# Supplementary material for: Penisimplicins A and B: Novel Polyketide–Peptide Hybrid Alkaloids from the Fungus Penicillium simplicissimum JXCC5
Source: MDPI journal article supplement (doi:10.3390/molecules29030613), 2024-01-27
Supplement: s1 [file s1]

Supporting Information for “**Penisimplicins A and B: Novel  
Polyketide–Peptide Hybrid Alkaloids from the Fungus  
*Penicillium simplicissimum* JXCC5**”

Qing-Yuan Wang <sup>1</sup>, Yang Gao <sup>2</sup>, Jian-Neng Yao <sup>3</sup>, Li Zhou <sup>2,\*</sup>, He-Ping Chen <sup>2,\*</sup> and Ji-Kai Liu <sup>2,\*</sup>

<sup>1</sup> School of Chemistry and Materials Science, South-Central Minzu University, Wuhan 430074, China

<sup>2</sup> School of Pharmaceutical Sciences, South-Central Minzu University, Wuhan 430074, China

<sup>3</sup> Yunnan Key Laboratory of Pharmacology for Natural Products & School of Pharmaceutical Science, Kunming Medical University, Kunming 650500, China; yaojianneng@kmmu.edu.cn

\* Correspondence: zhou2018@scuec.edu.cn (L.Z.); chenhp@mail.scuec.edu.cn (H.-P.C.); liujikai@mail.scuec.edu.cn (J.-K.L.)

## Contents

|                                                                                          |    |
|------------------------------------------------------------------------------------------|----|
| 1. Supplementary Figures .....                                                           | 2  |
| Figure S1. $^1\text{H}$ NMR spectrum of 1 (600 MHz, $\text{DMSO-}d_6$ ).....             | 2  |
| Figure S2. $^{13}\text{C}$ and DEPT NMR spectra of 1 (150 MHz, $\text{DMSO-}d_6$ ). .... | 3  |
| Figure S3. HSQC spectrum of 1. ....                                                      | 4  |
| Figure S4. $^1\text{H}$ - $^1\text{H}$ COSY spectrum of 1.....                           | 5  |
| Figure S5. HMBC spectrum of 1. ....                                                      | 6  |
| Figure S6. ROESY spectrum of 1.....                                                      | 7  |
| Figure S7. Entire and partly (+)-HRESIMS spectrum of 1.....                              | 8  |
| Figure S8. CD and UV spectra of compound 1.....                                          | 9  |
| Figure S9. $^1\text{H}$ NMR spectrum of 2 (600 MHz, $\text{DMSO-}d_6$ ).....             | 10 |
| Figure S10. $^{13}\text{C}$ NMR spectrum of 2 (150 MHz, $\text{DMSO-}d_6$ ).....         | 11 |
| Figure S11. HSQC spectrum of 2.....                                                      | 12 |
| Figure S12. $^1\text{H}$ - $^1\text{H}$ COSY spectrum of 2.....                          | 13 |
| Figure S13. HMBC spectrum of 2. ....                                                     | 14 |
| Figure S14. ROESY spectrum of 2. ....                                                    | 15 |
| Figure S15. Enlarged ROESY spectrum of 2.....                                            | 16 |
| Figure S16. Entire and partly (+)-HRESIMS spectrum of 2.....                             | 17 |
| Figure S17. CD and UV spectra of compound 2.....                                         | 18 |
| Figure S18. Acetylcholinesterase Inhibitory activity of 1.....                           | 19 |
| Figure S19. LC-MS analysis of crude extract (TIC).....                                   | 19 |
| 2. Computational Details.....                                                            | 20 |
| 2.1 ECD calculation details of compound 1.....                                           | 20 |
| 2.2 NMR calculation details of compound 1.....                                           | 21 |
| 2.2 NMR calculation details of compound 2.....                                           | 25 |
| 2.3 Standard orientations.....                                                           | 29 |

## S1. Supplementary Figures

**Figure S1.**  $^1\text{H}$  NMR spectrum of **1** (600 MHz,  $\text{DMSO-}d_6$ ).

LCJF-19c. 1. fid

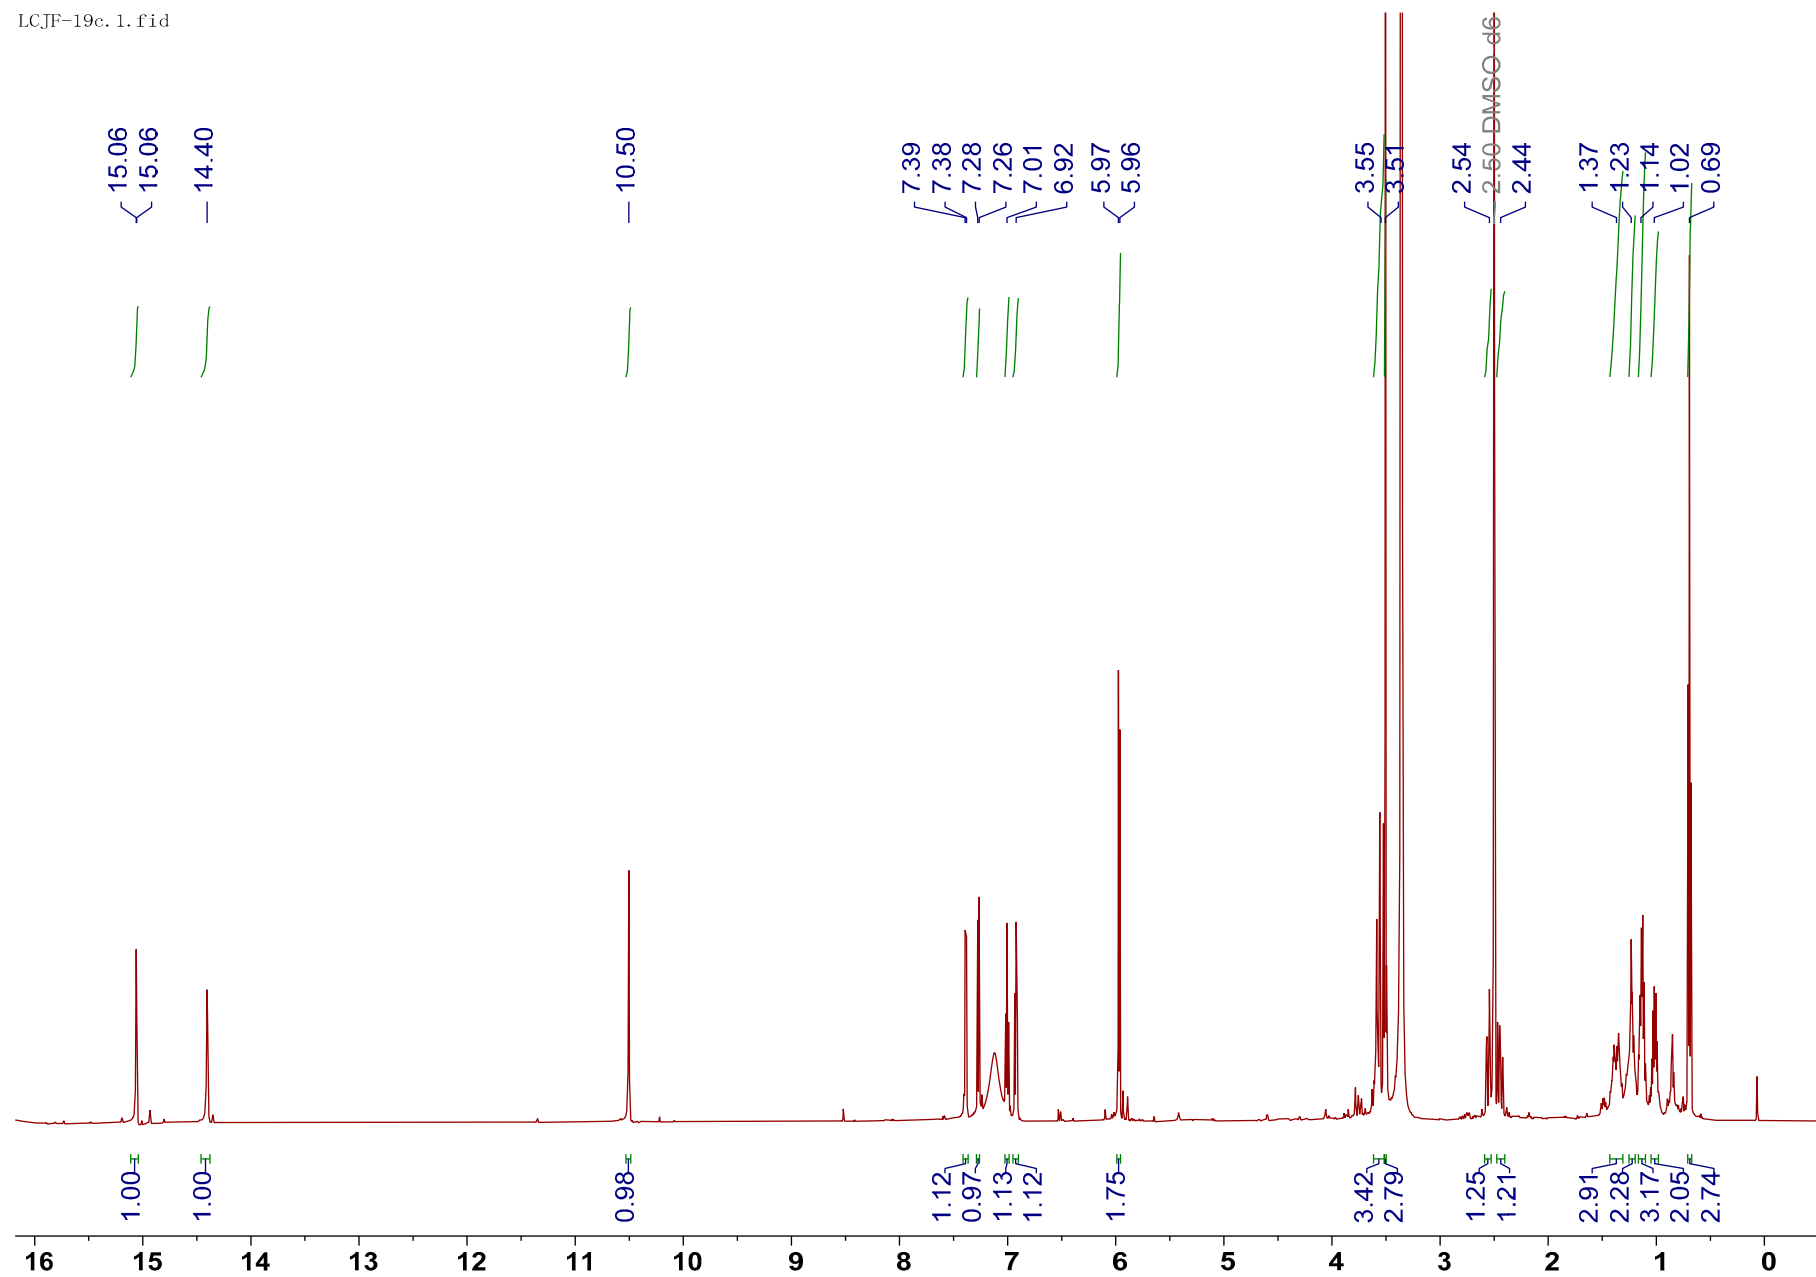

**Figure S2.**  $^{13}\text{C}$  and DEPT NMR spectra of **1** (150 MHz,  $\text{DMSO-}d_6$ ).

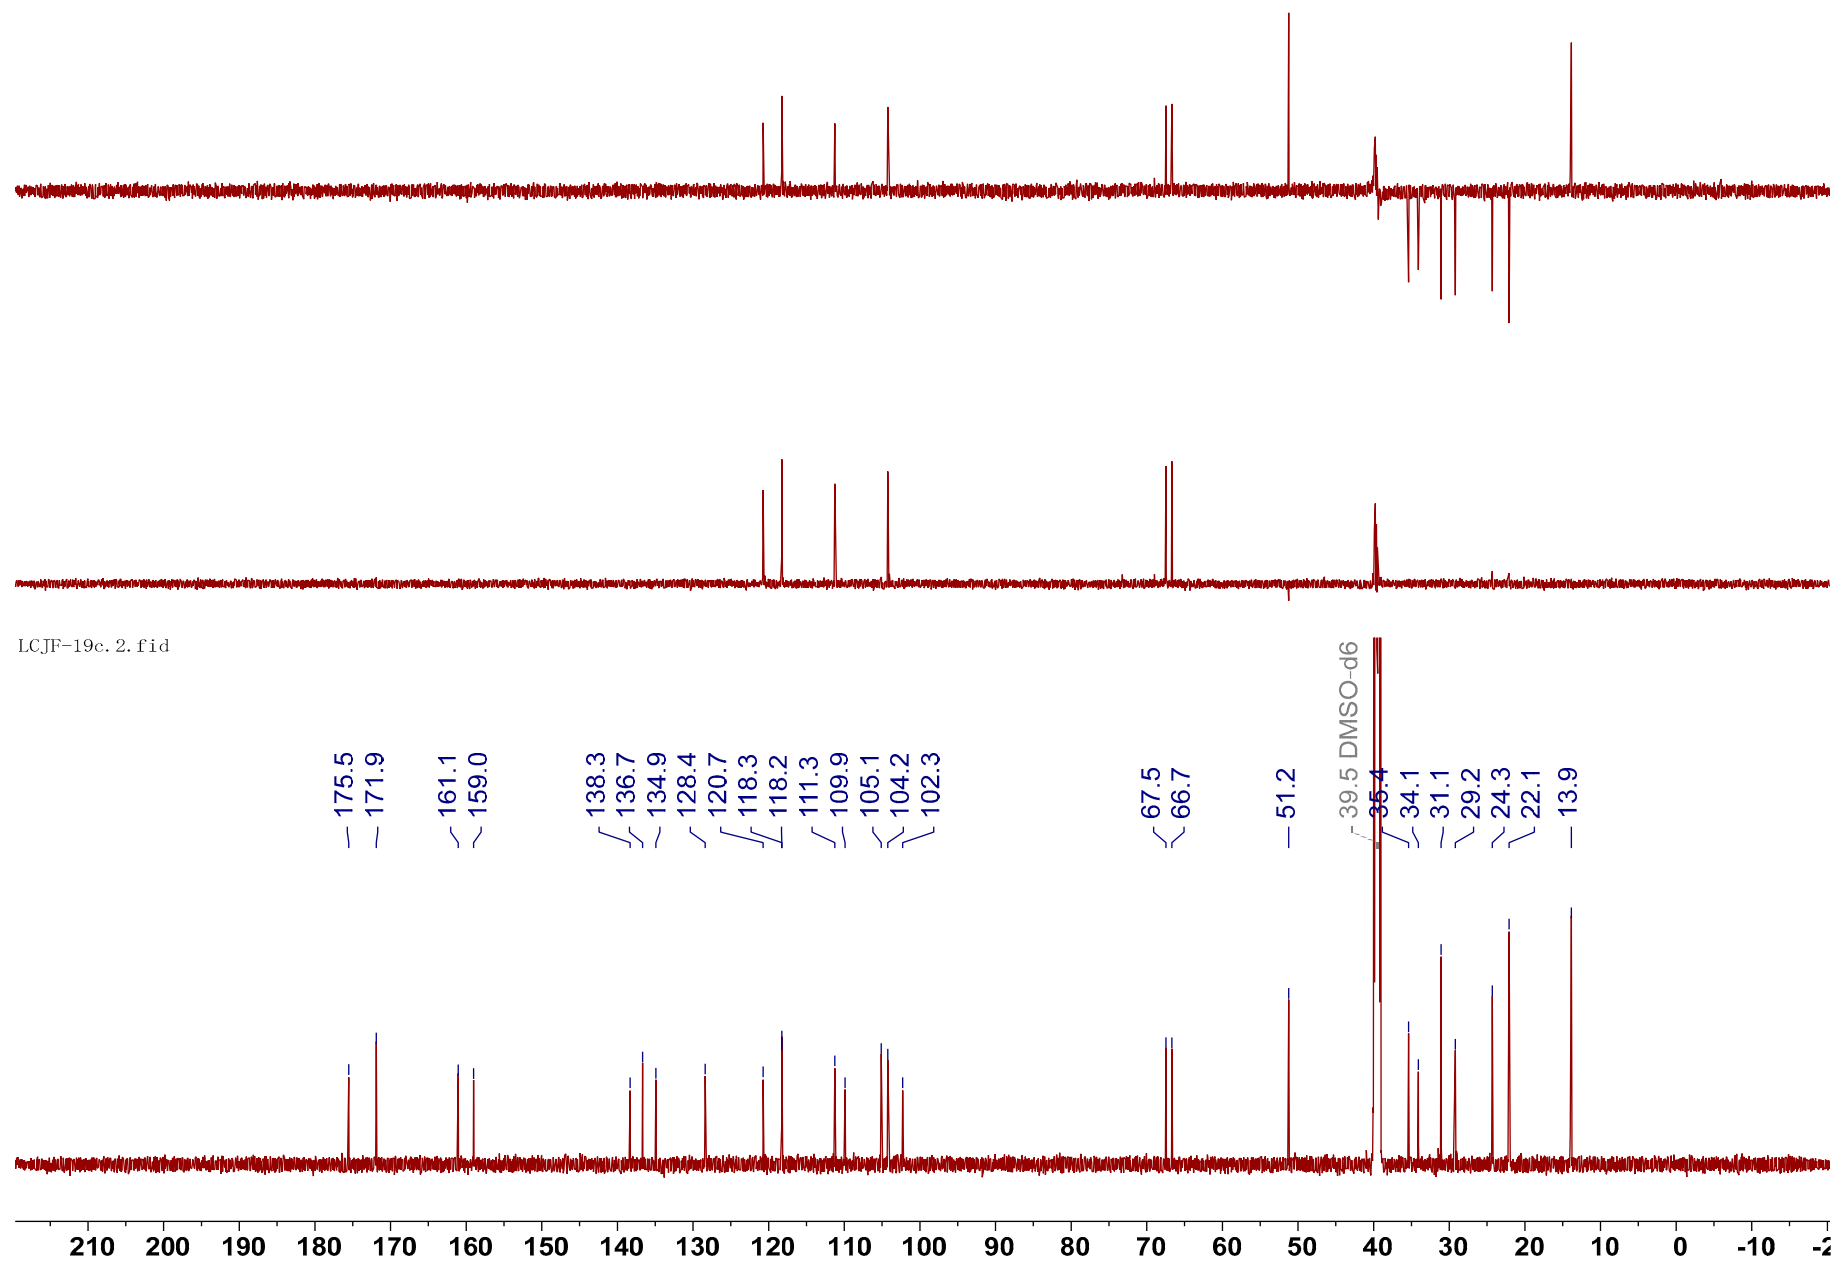

**Figure S3.** HSQC spectrum of **1**.

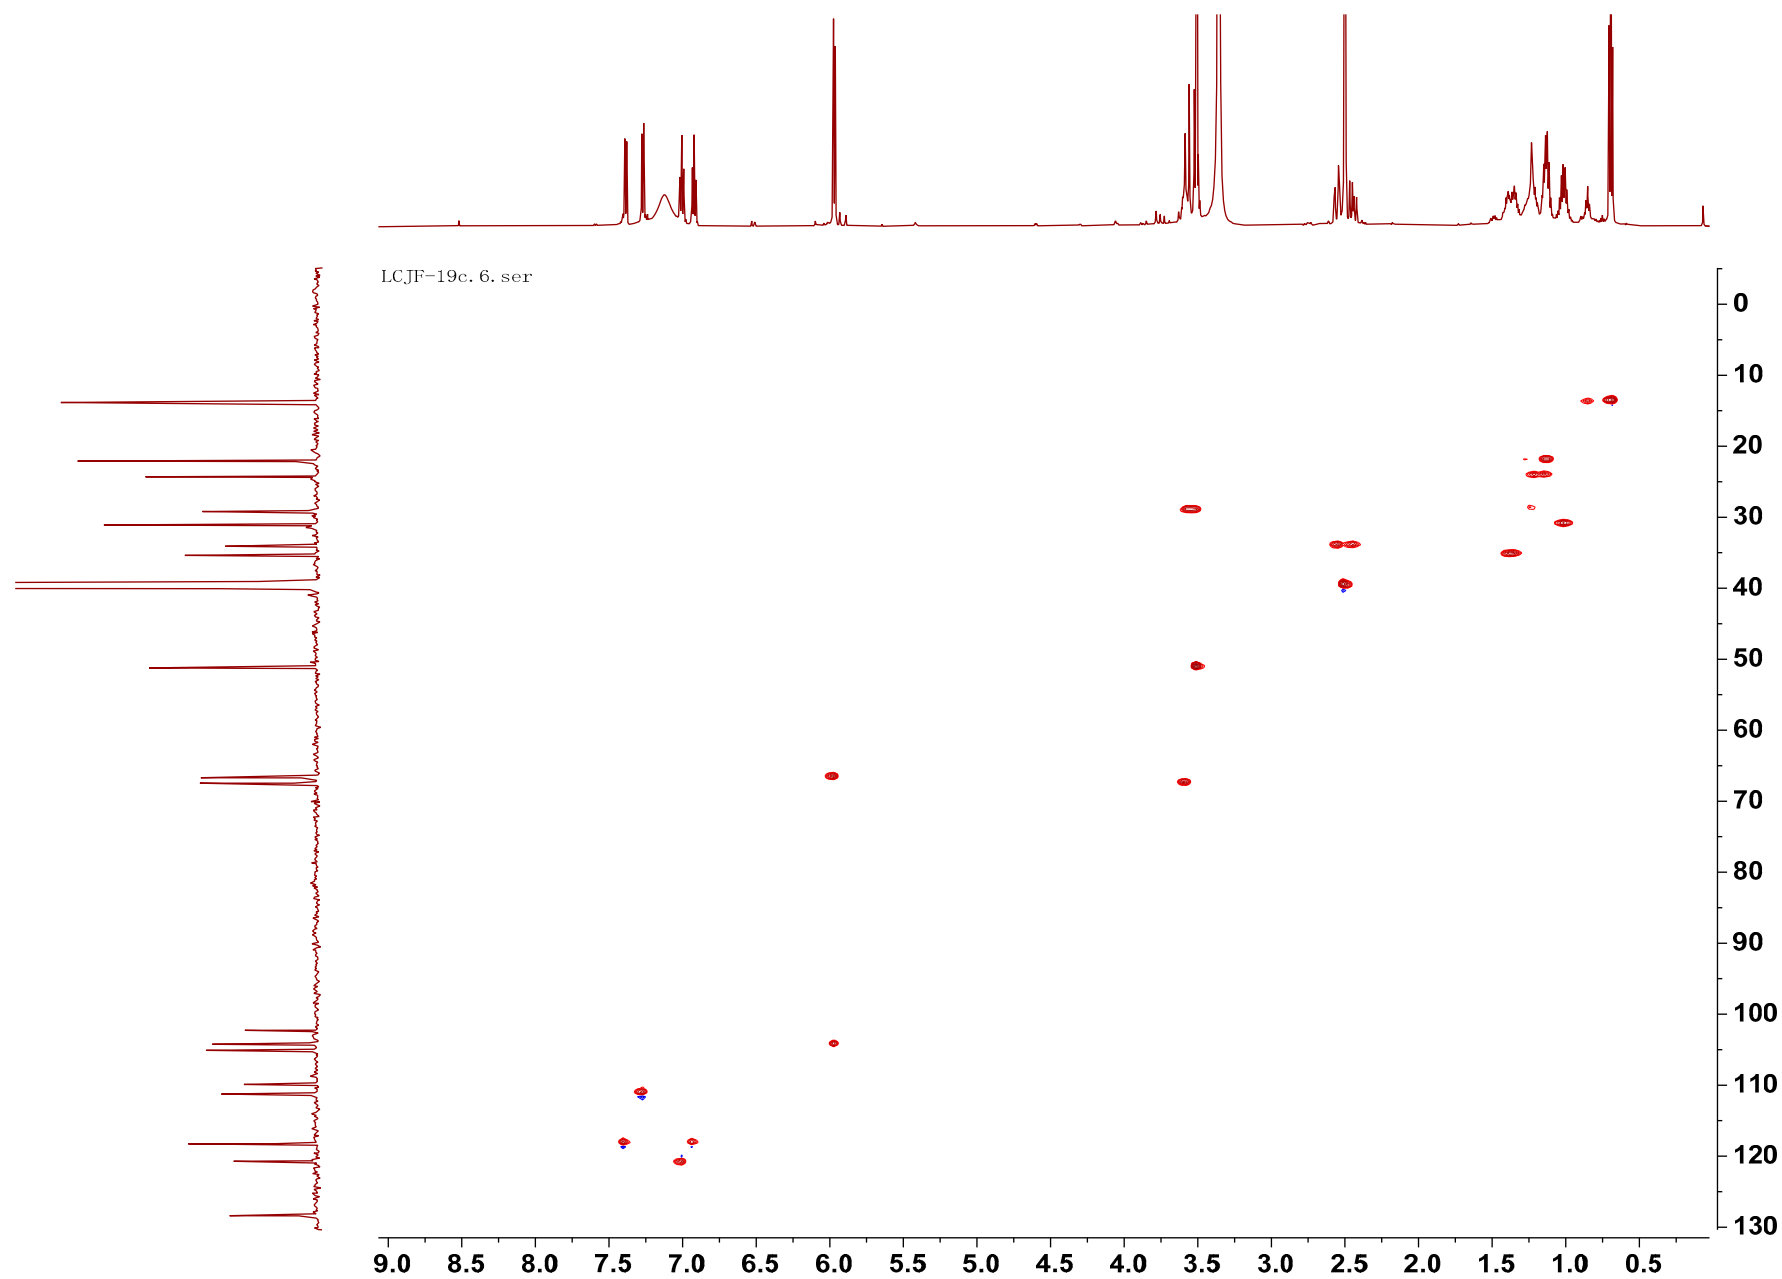

**Figure S4.**  $^1\text{H}$ - $^1\text{H}$  COSY spectrum of **1**.

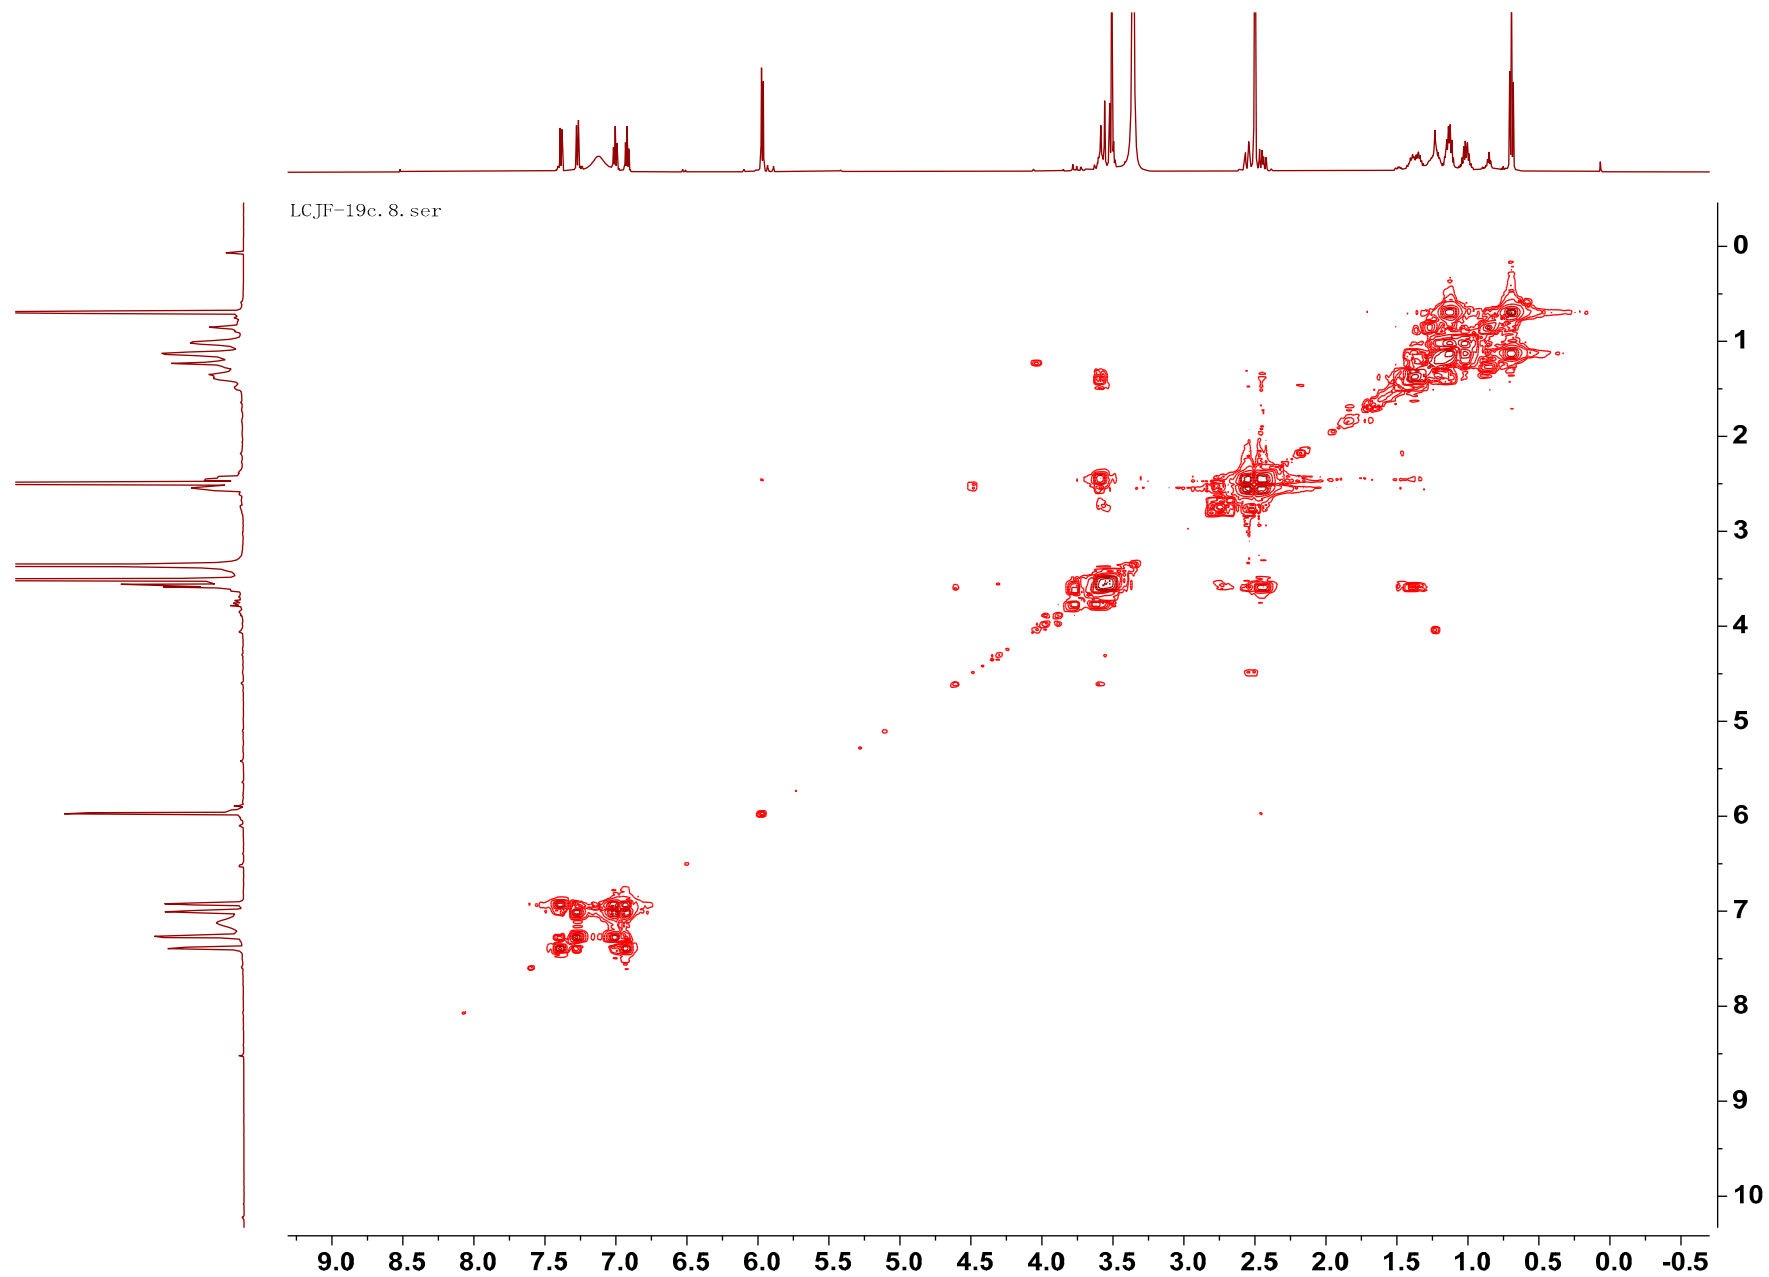

**Figure S5.** HMBC spectrum of **1**.

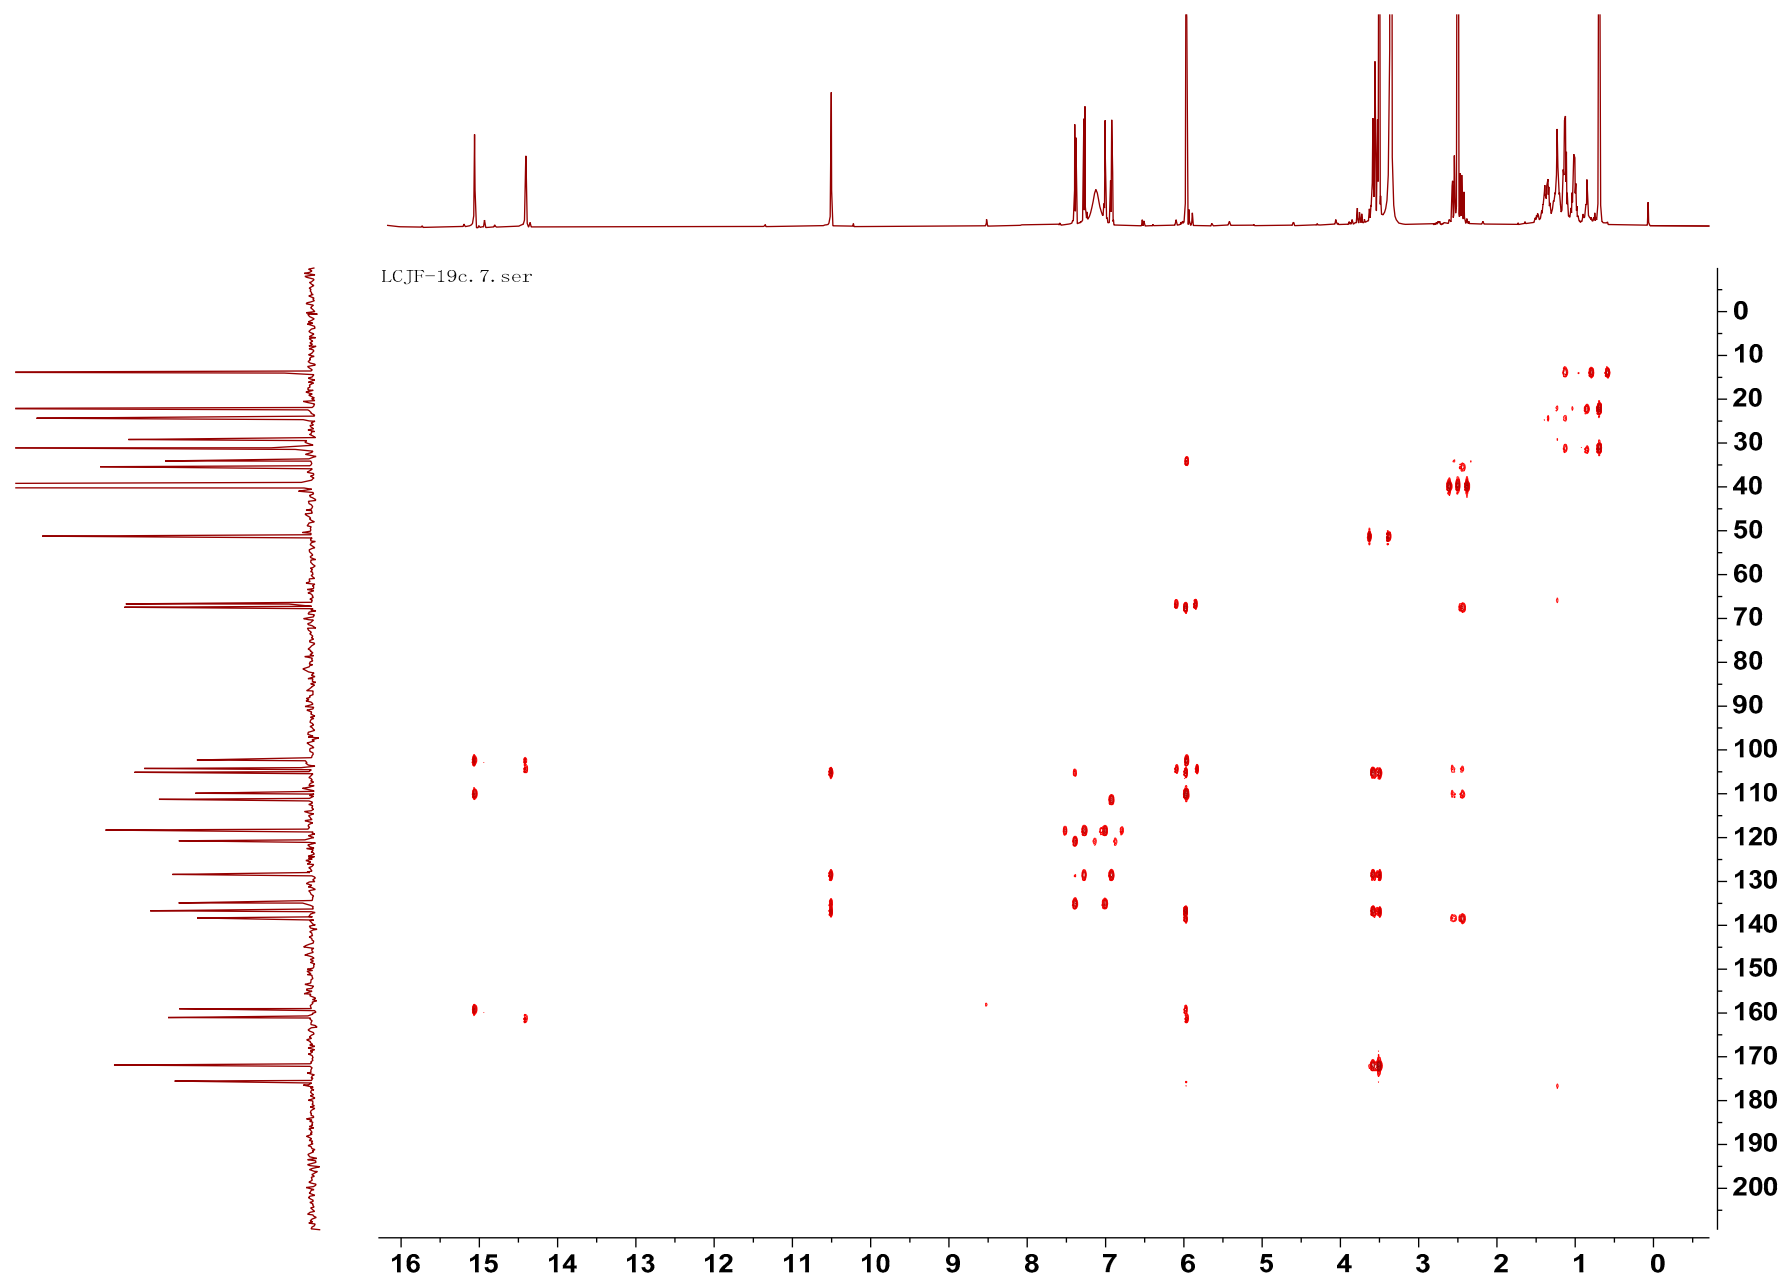

**Figure S6.** ROESY spectrum of **1**.

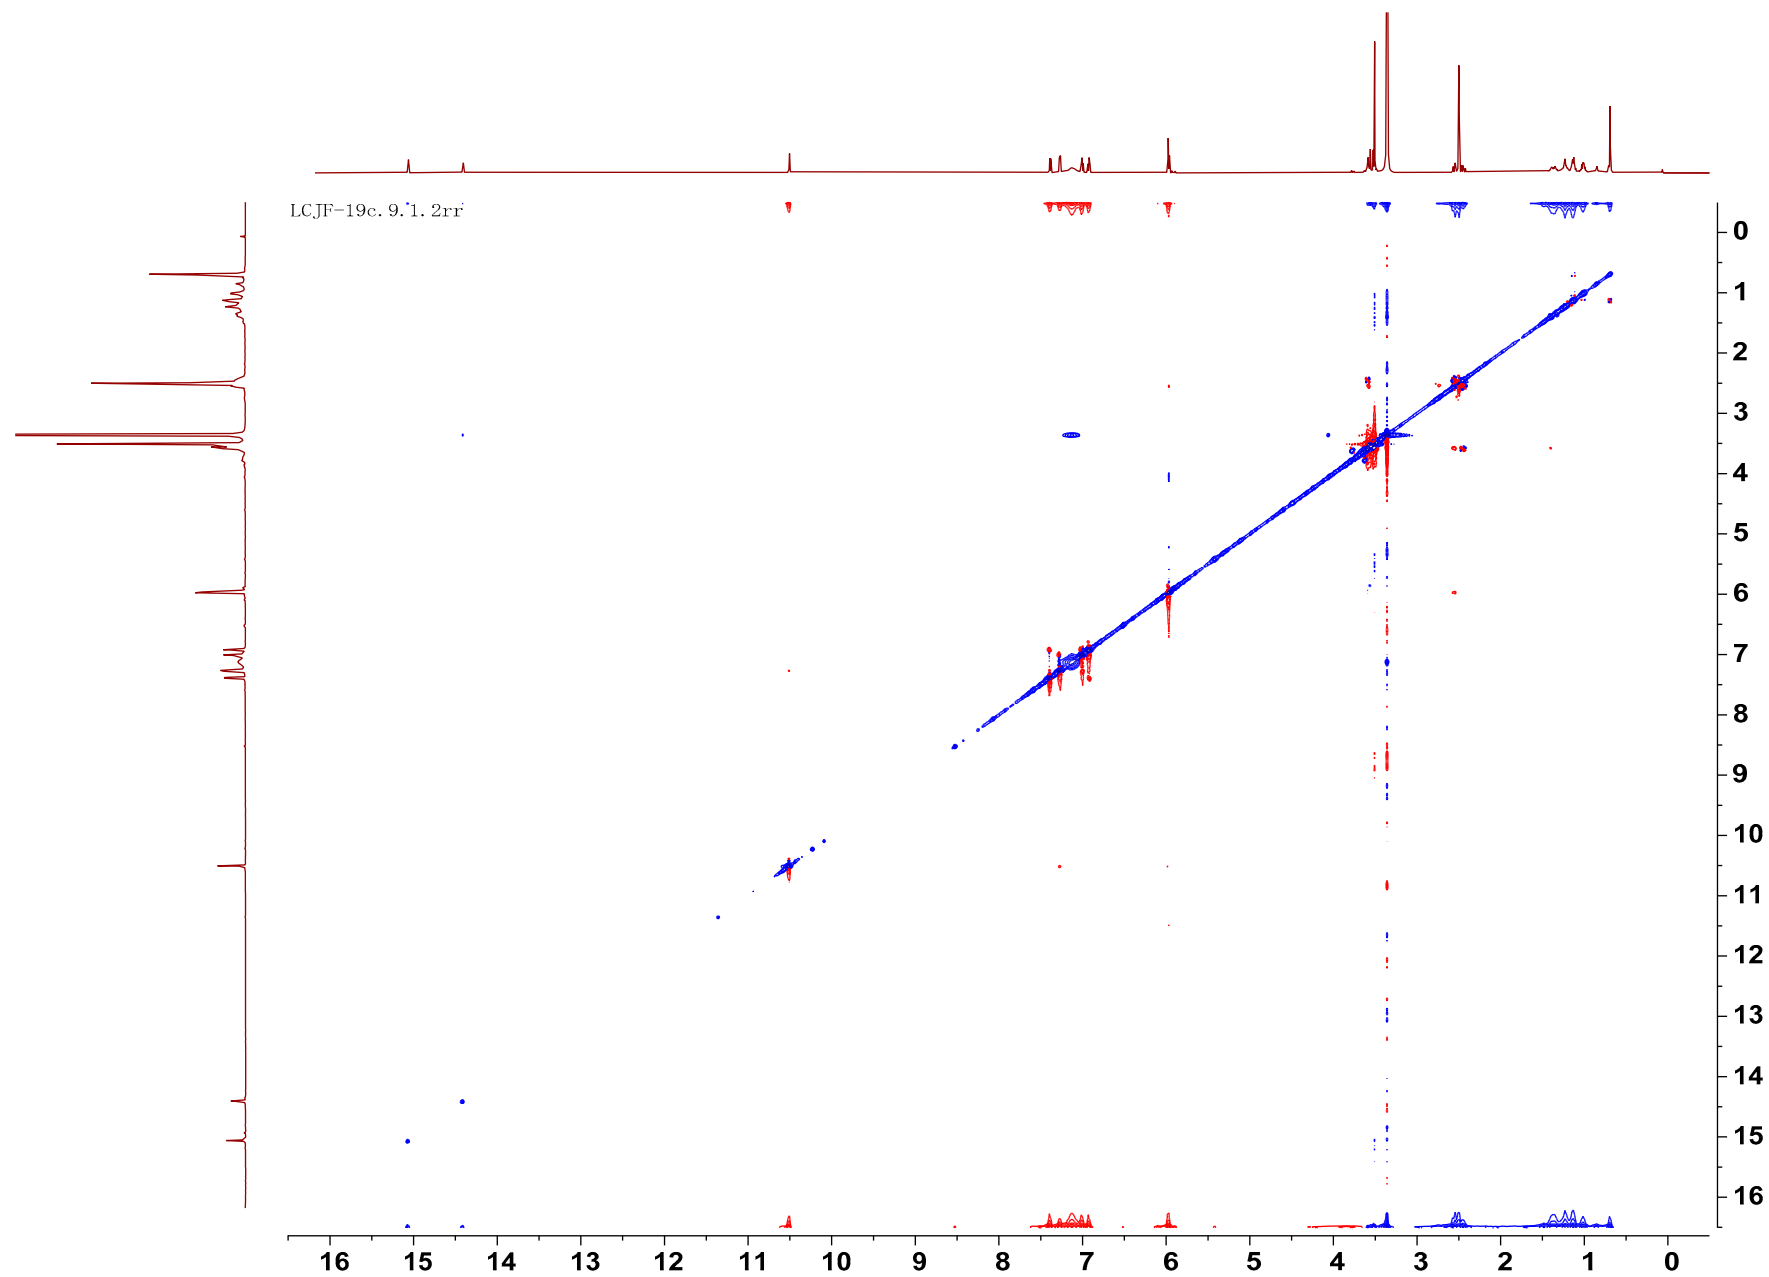

**Figure S7.** Entire and partly (+)-HRESIMS spectrum of **1**.

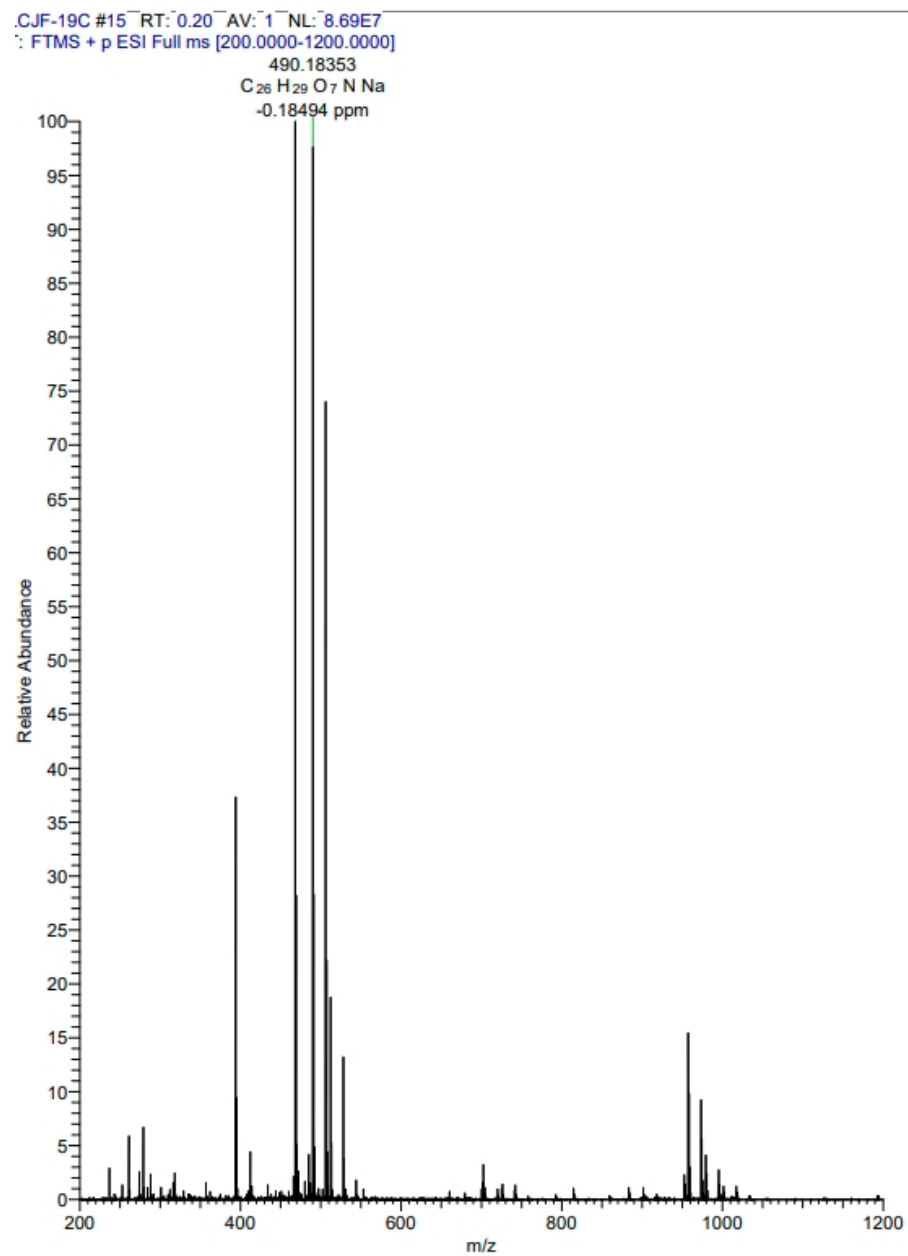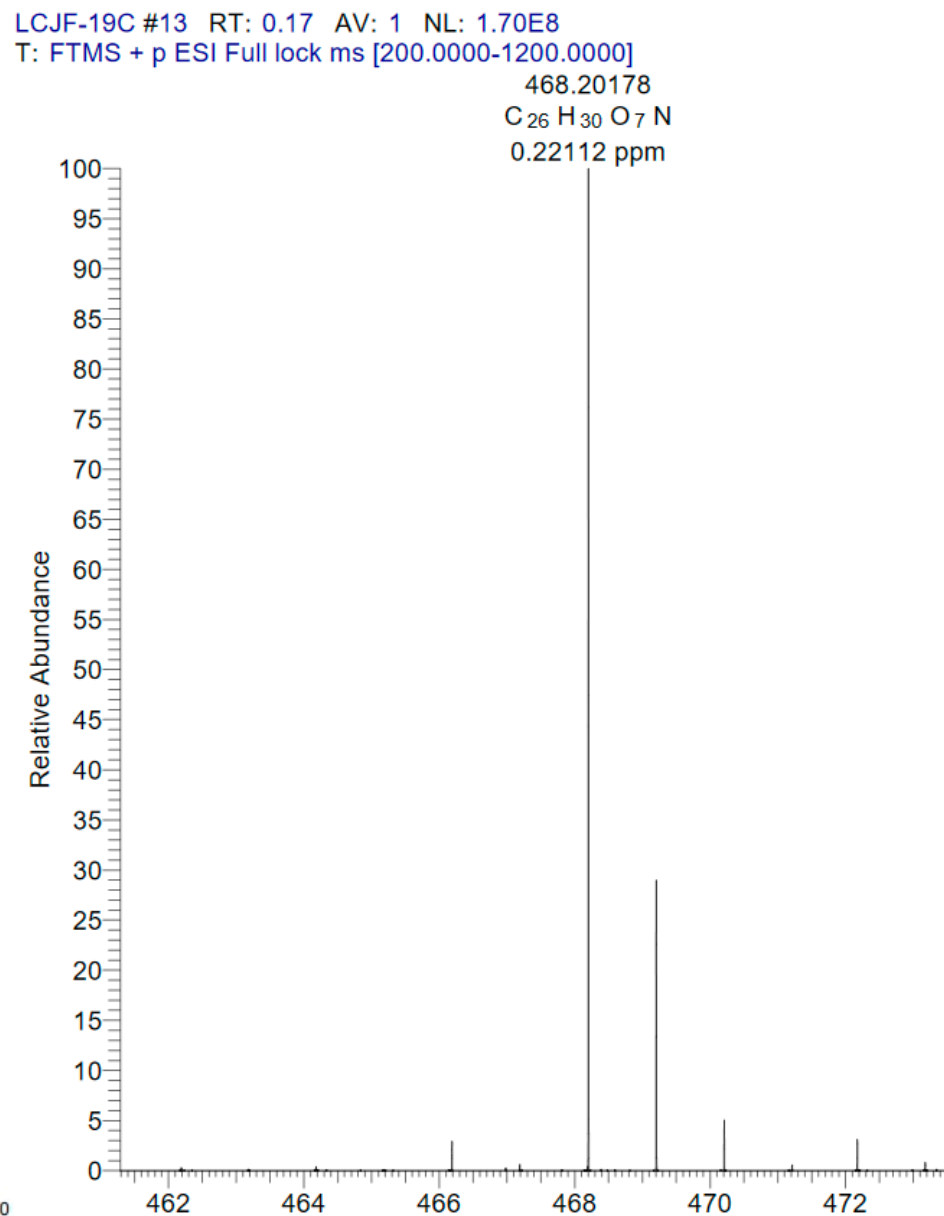

**Figure S8.** CD and UV spectra of compound **1**.

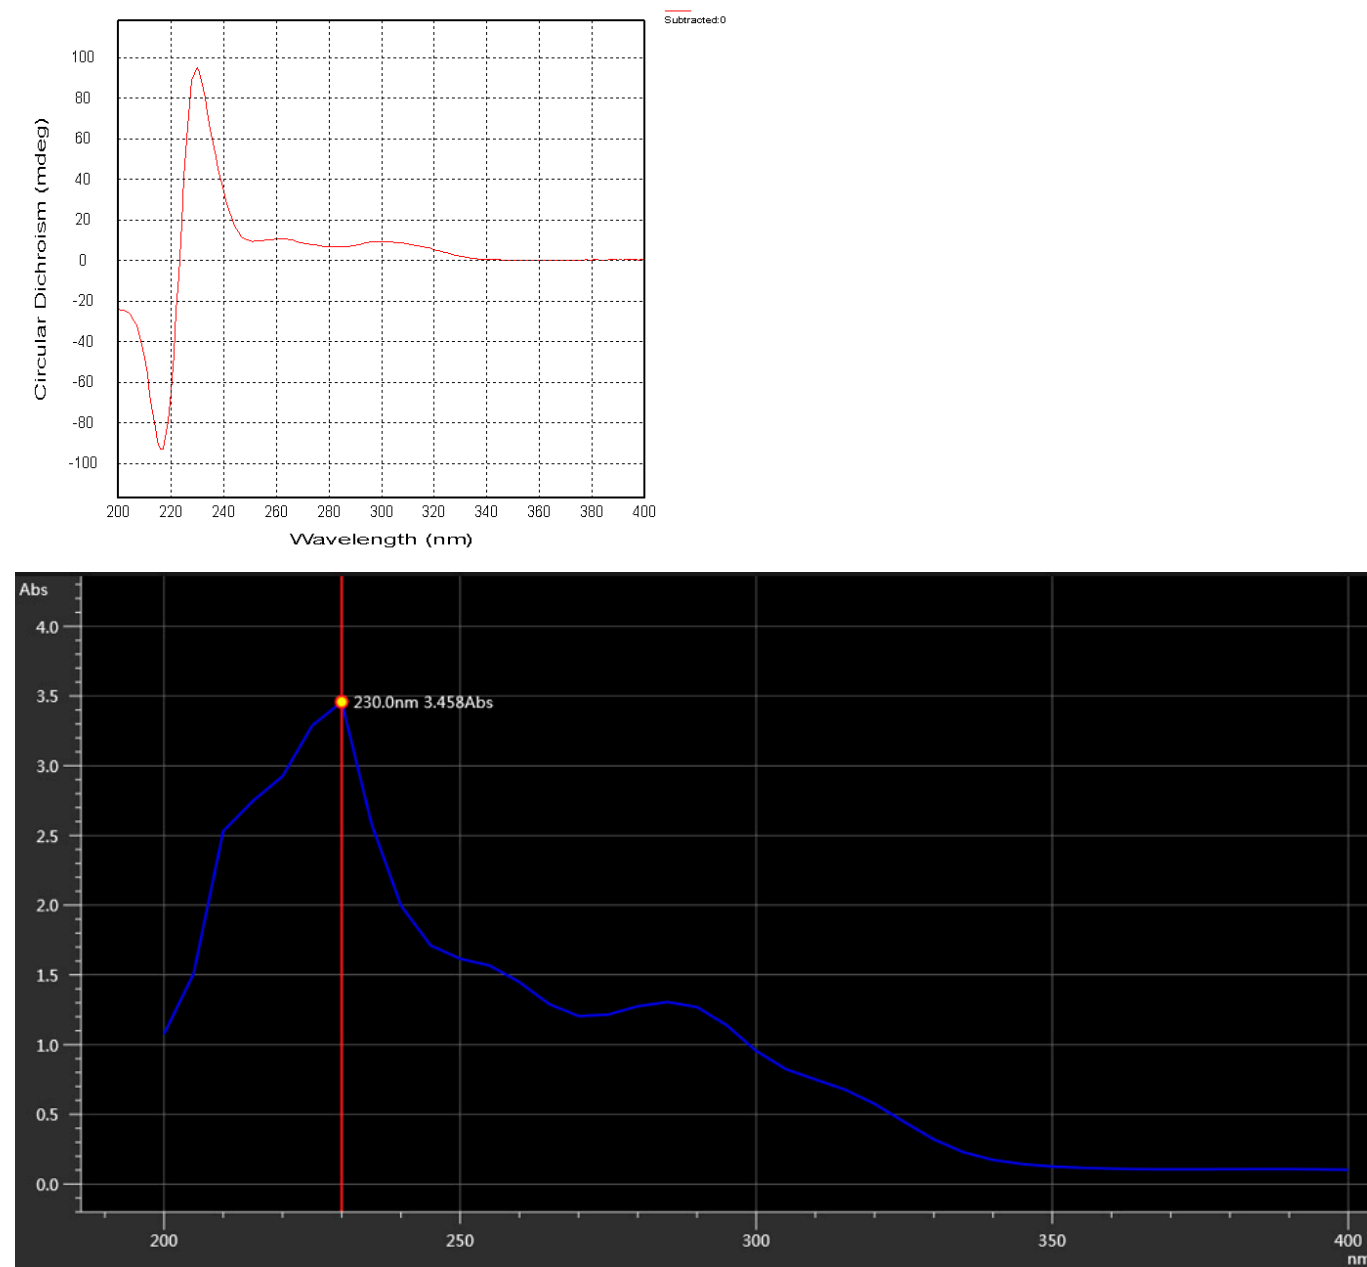

**Figure S9.**  $^1\text{H}$  NMR spectrum of **2** (600 MHz,  $\text{DMSO-}d_6$ ).

LCJF-27a. 1. fid

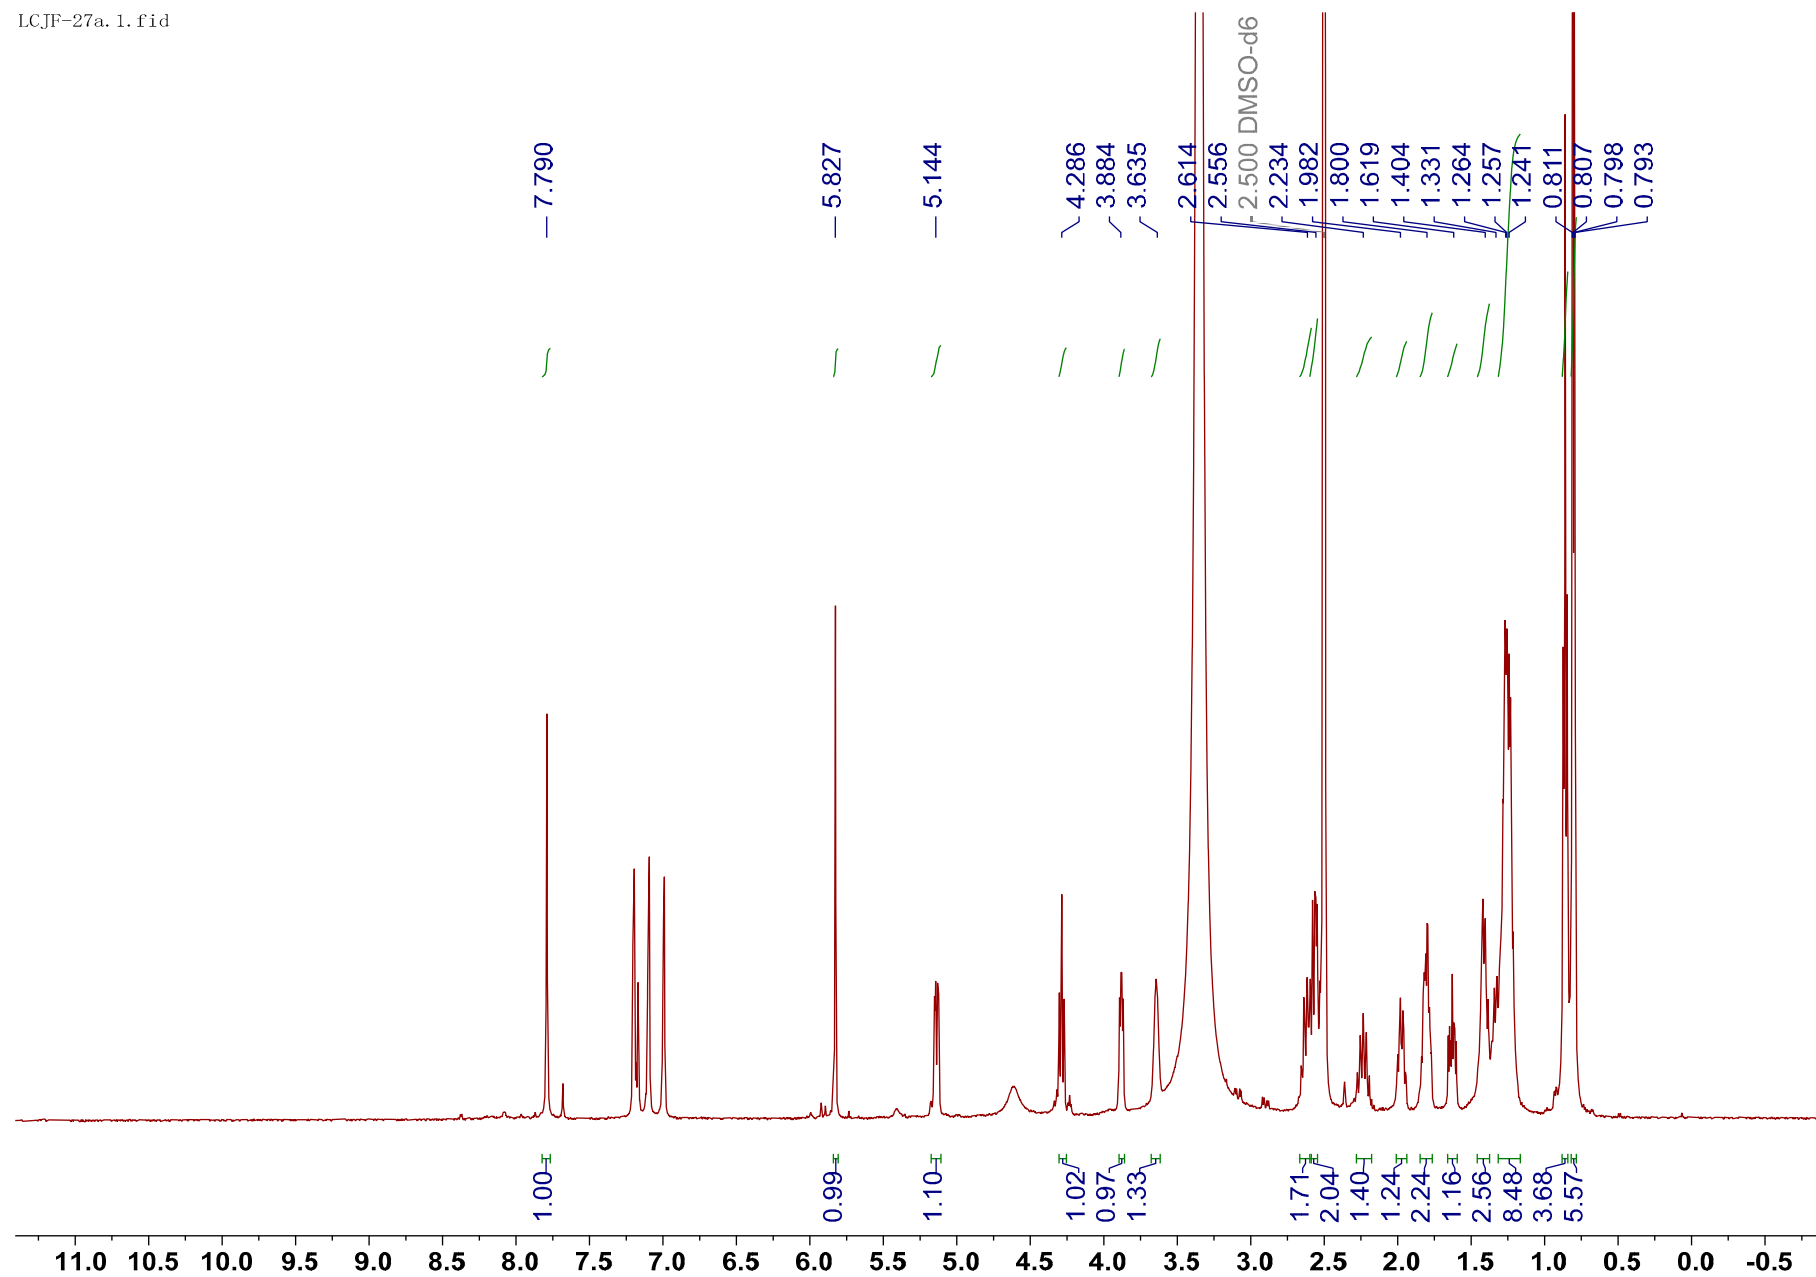

**Figure S10.**  $^{13}\text{C}$  NMR spectrum of **2** (150 MHz,  $\text{DMSO-}d_6$ ).

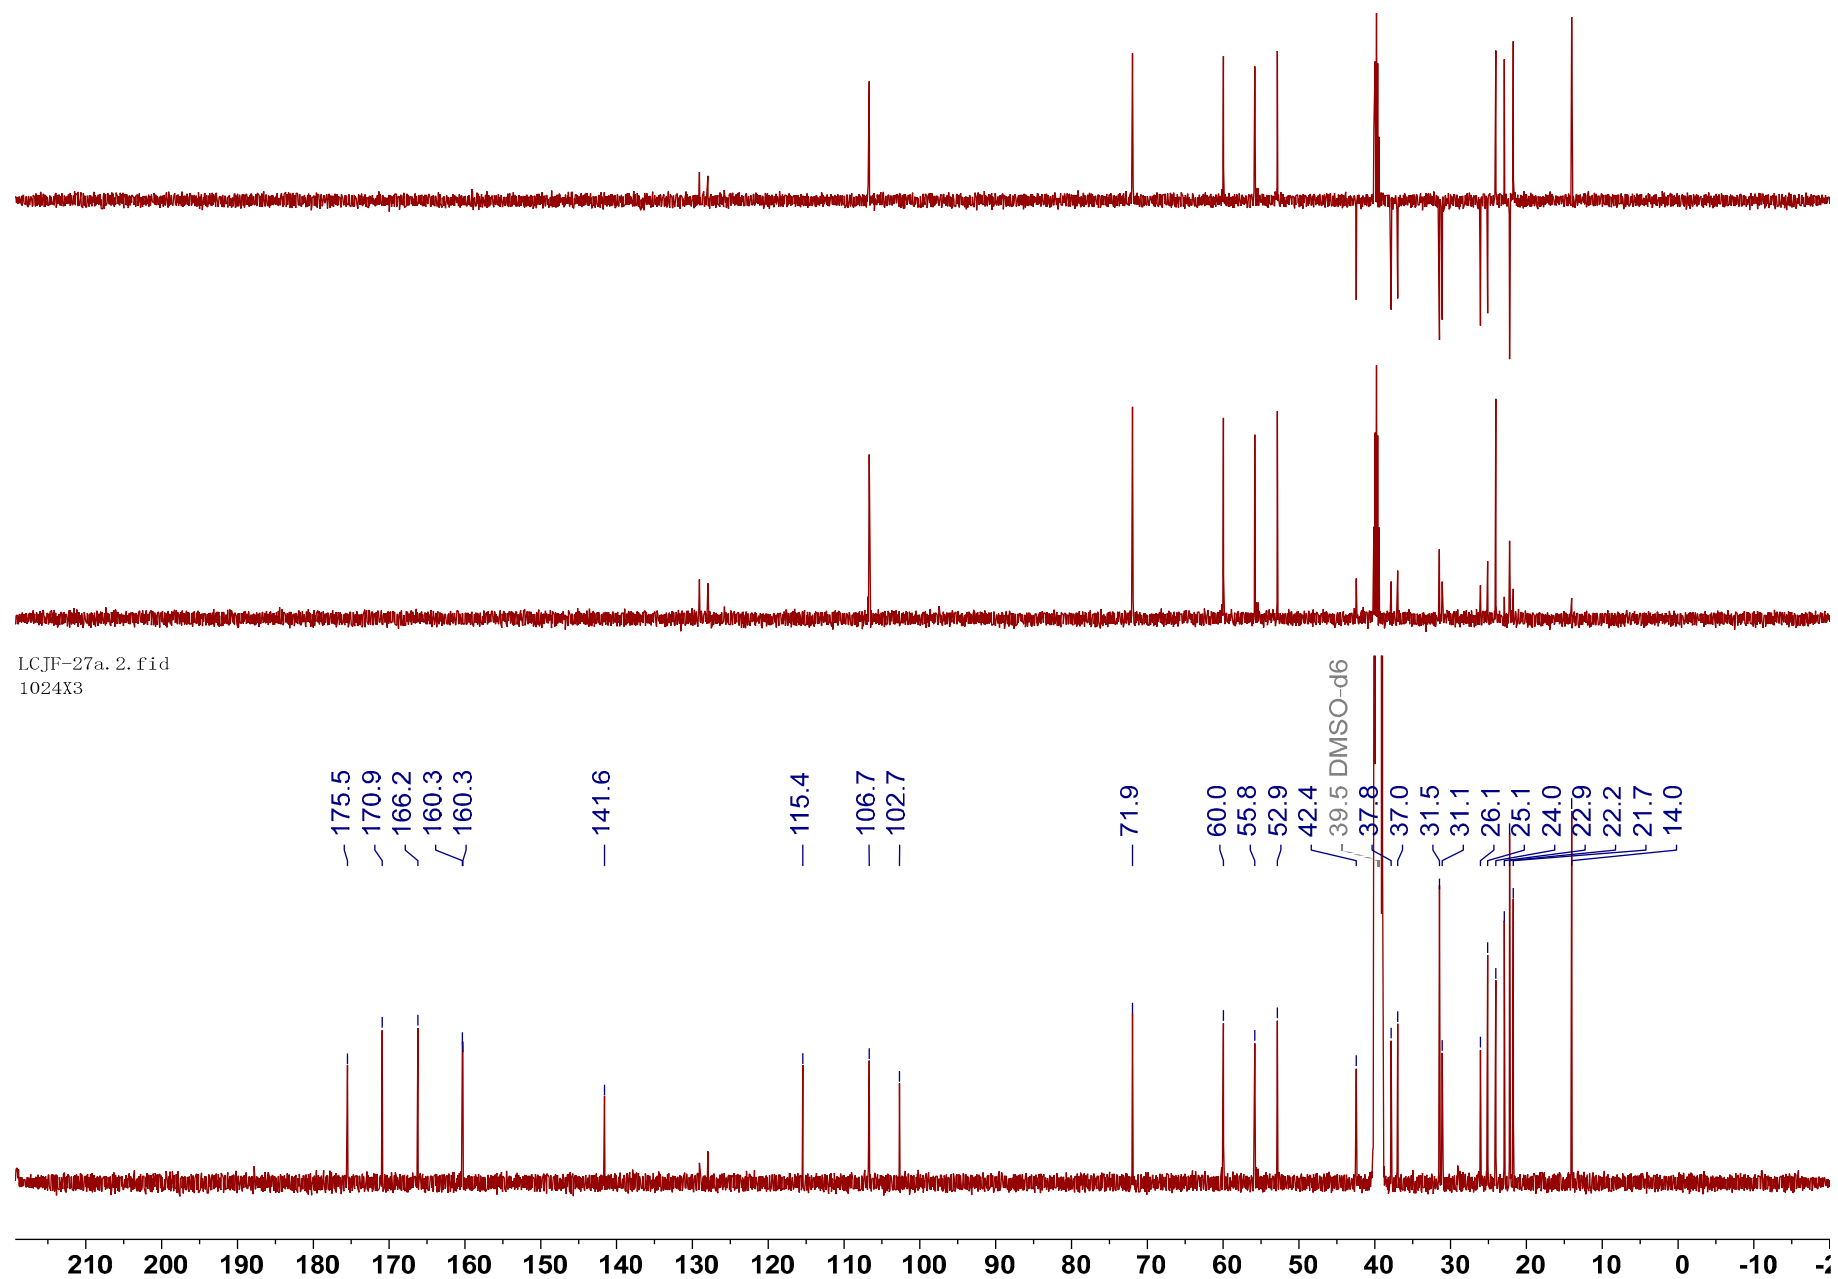

Figure S11. HSQC spectrum of 2.

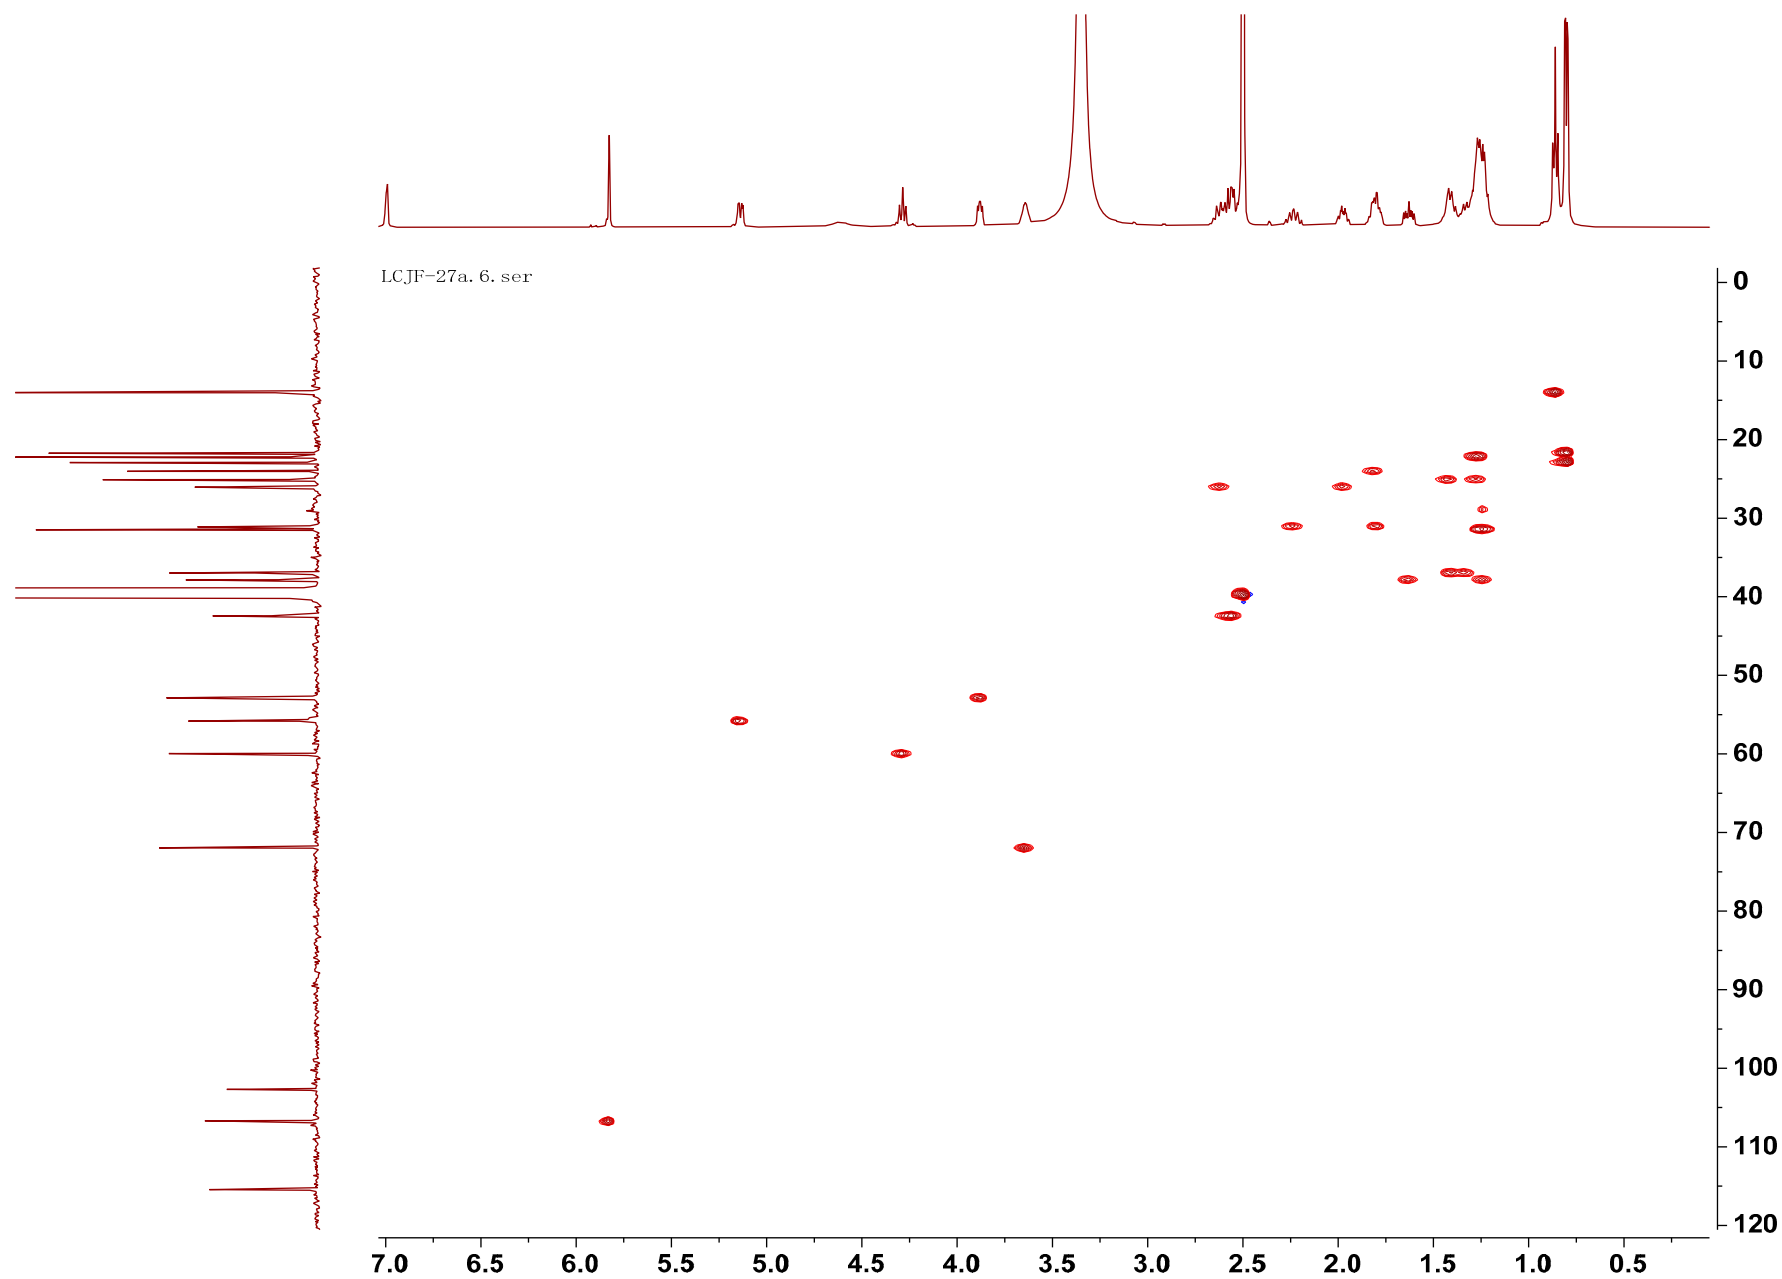

Figure S12.  $^1\text{H}$ - $^1\text{H}$  COSY spectrum of 2.

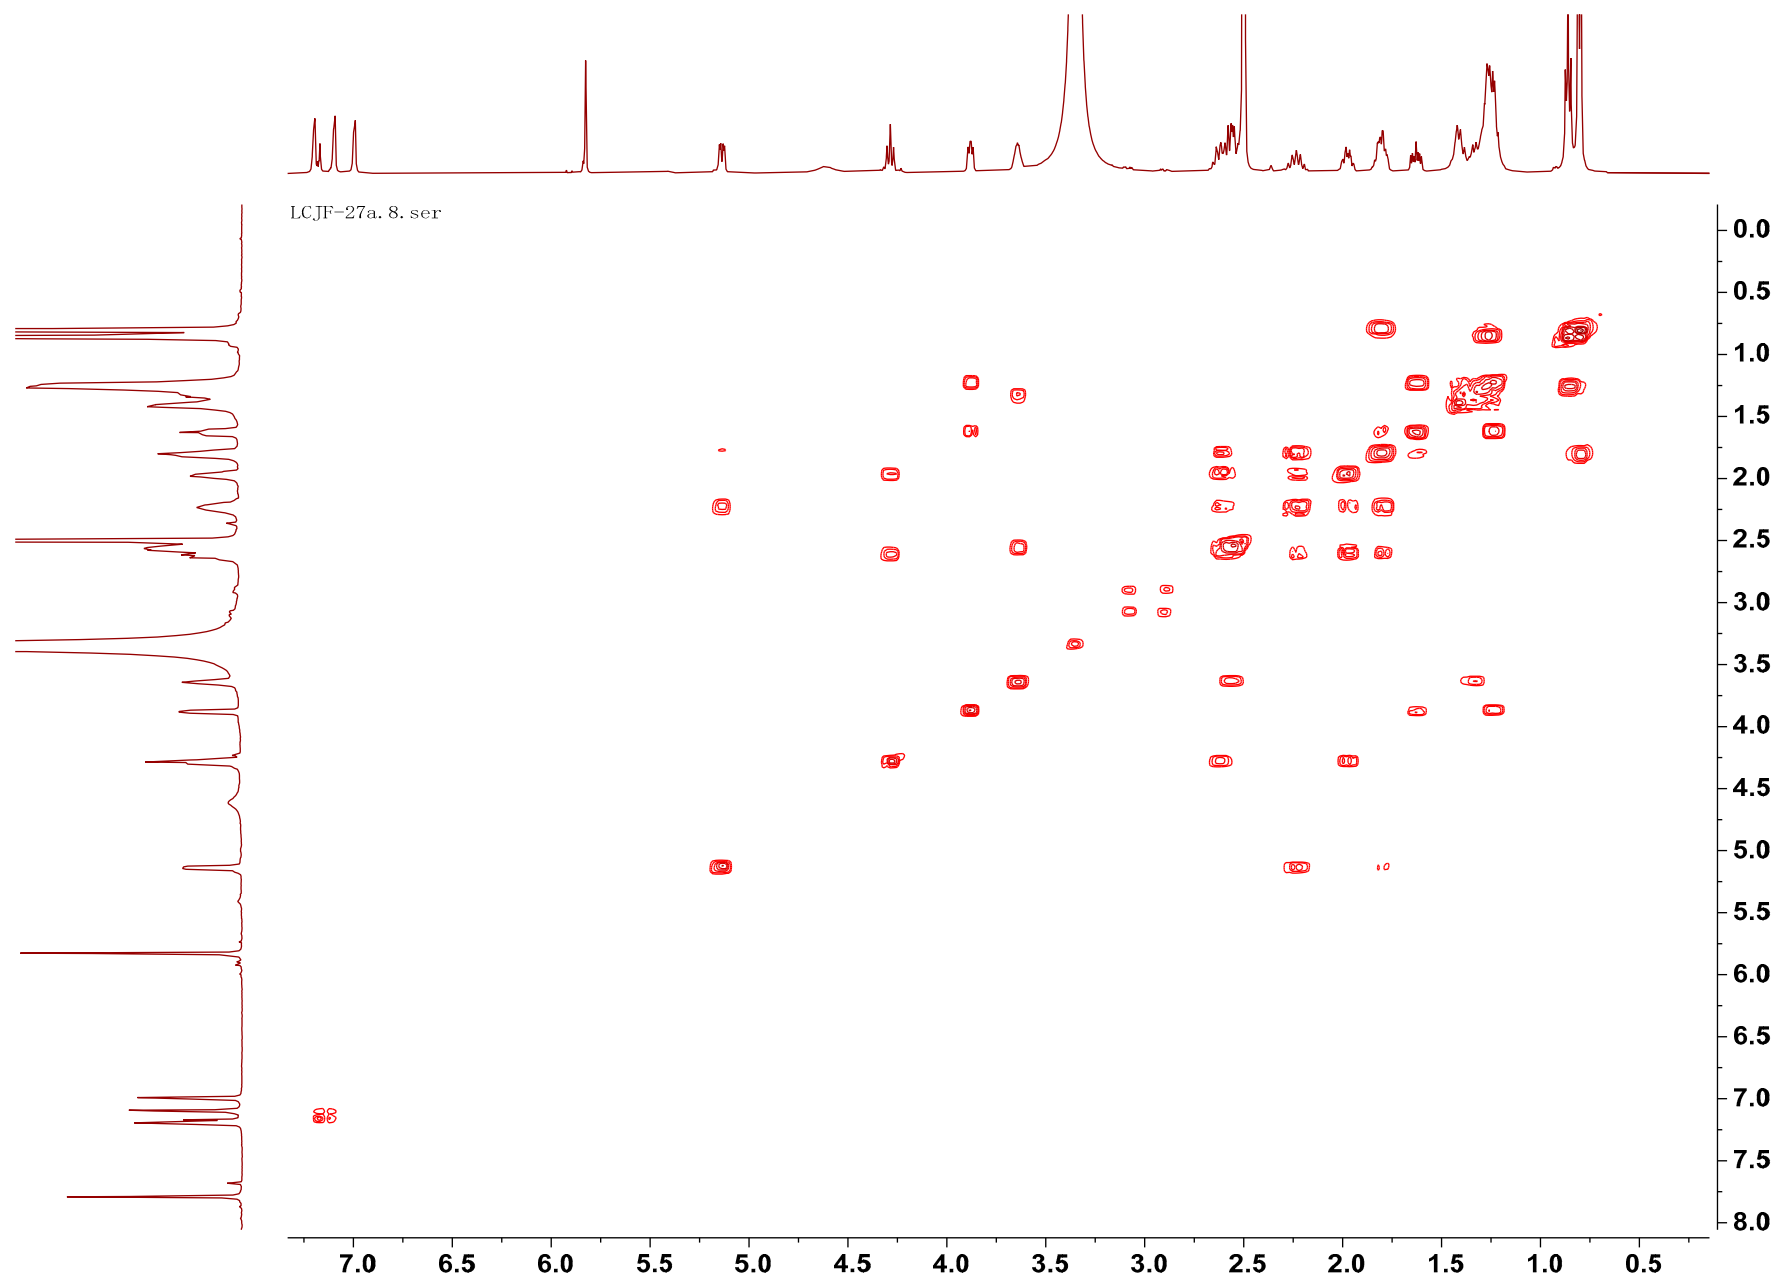

**Figure S13.** HMBC spectrum of **2**.

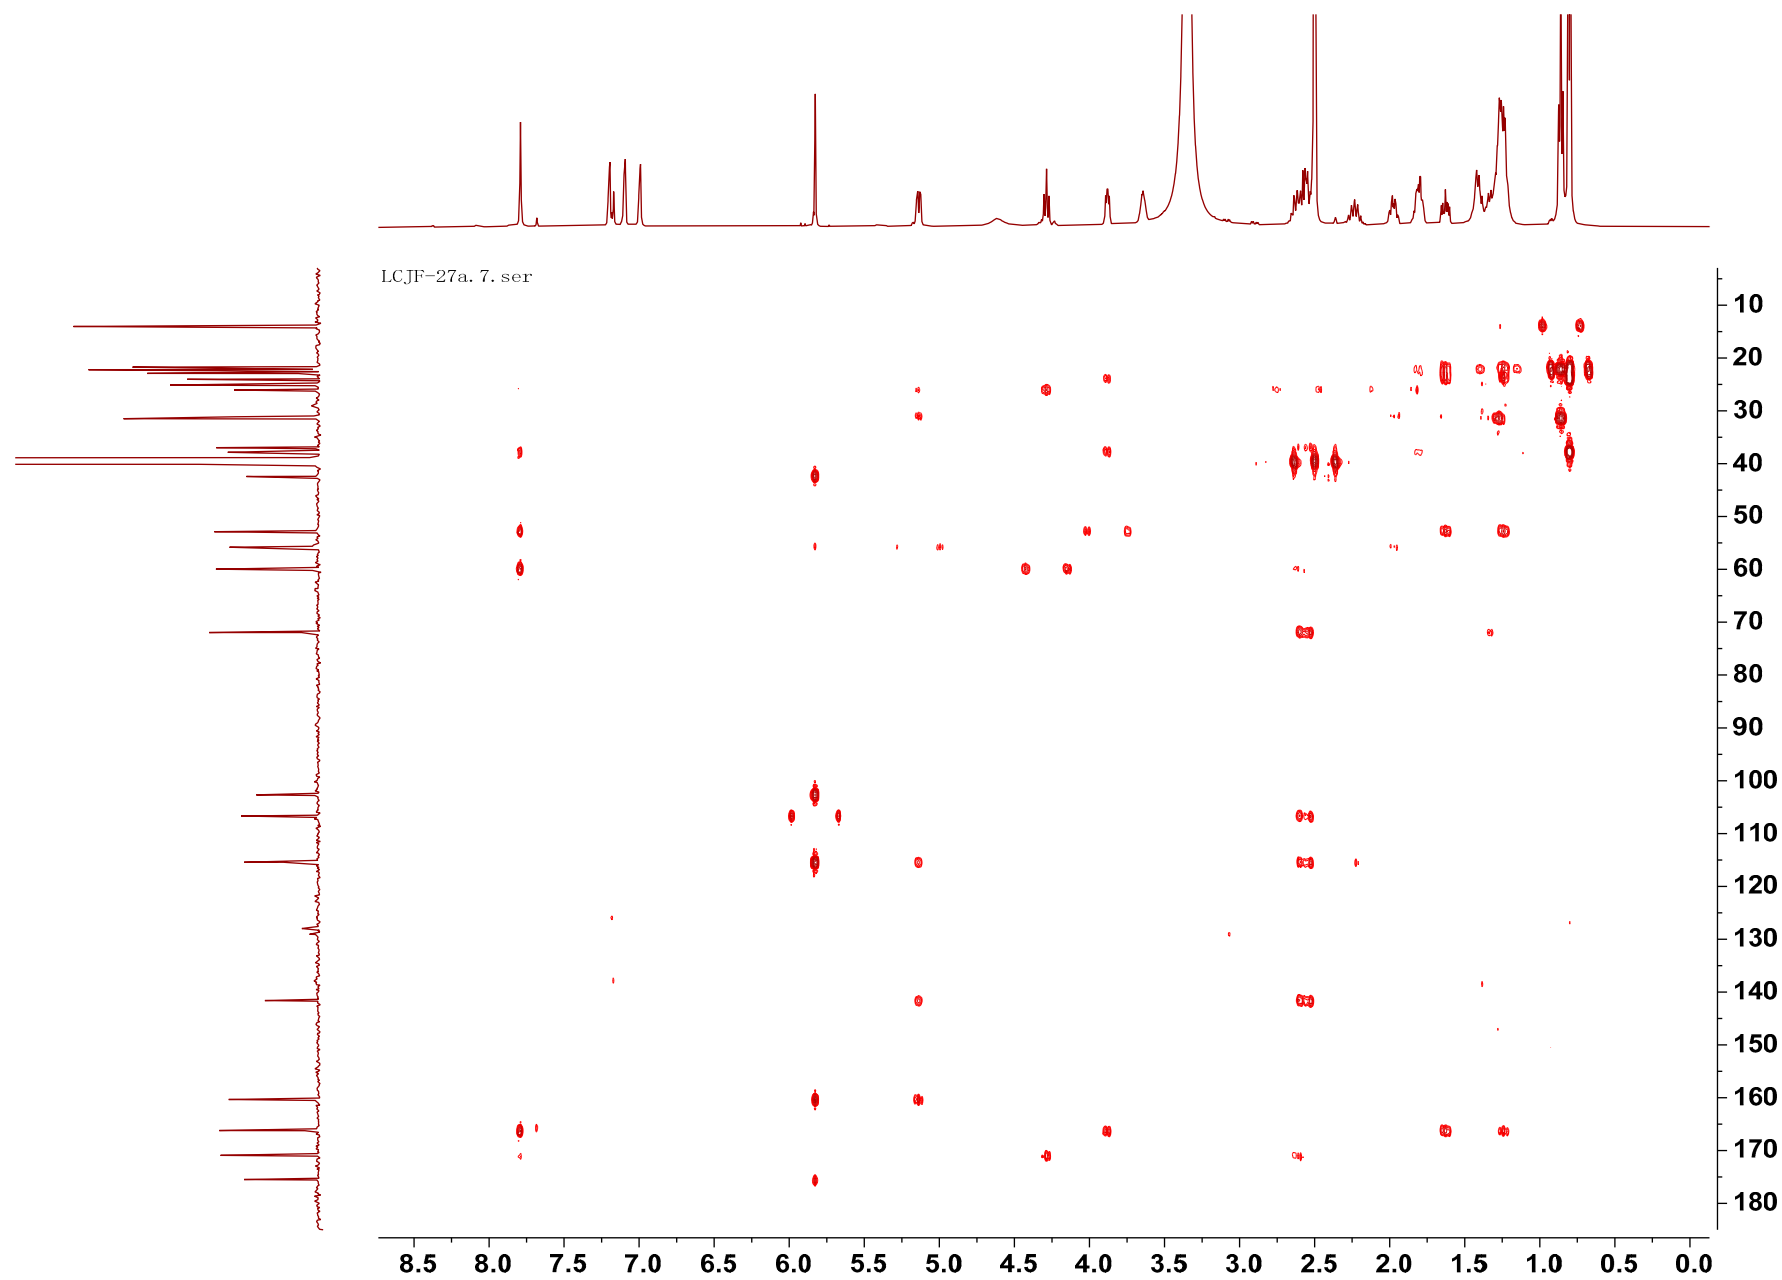

**Figure S14.** ROESY spectrum of **2**.

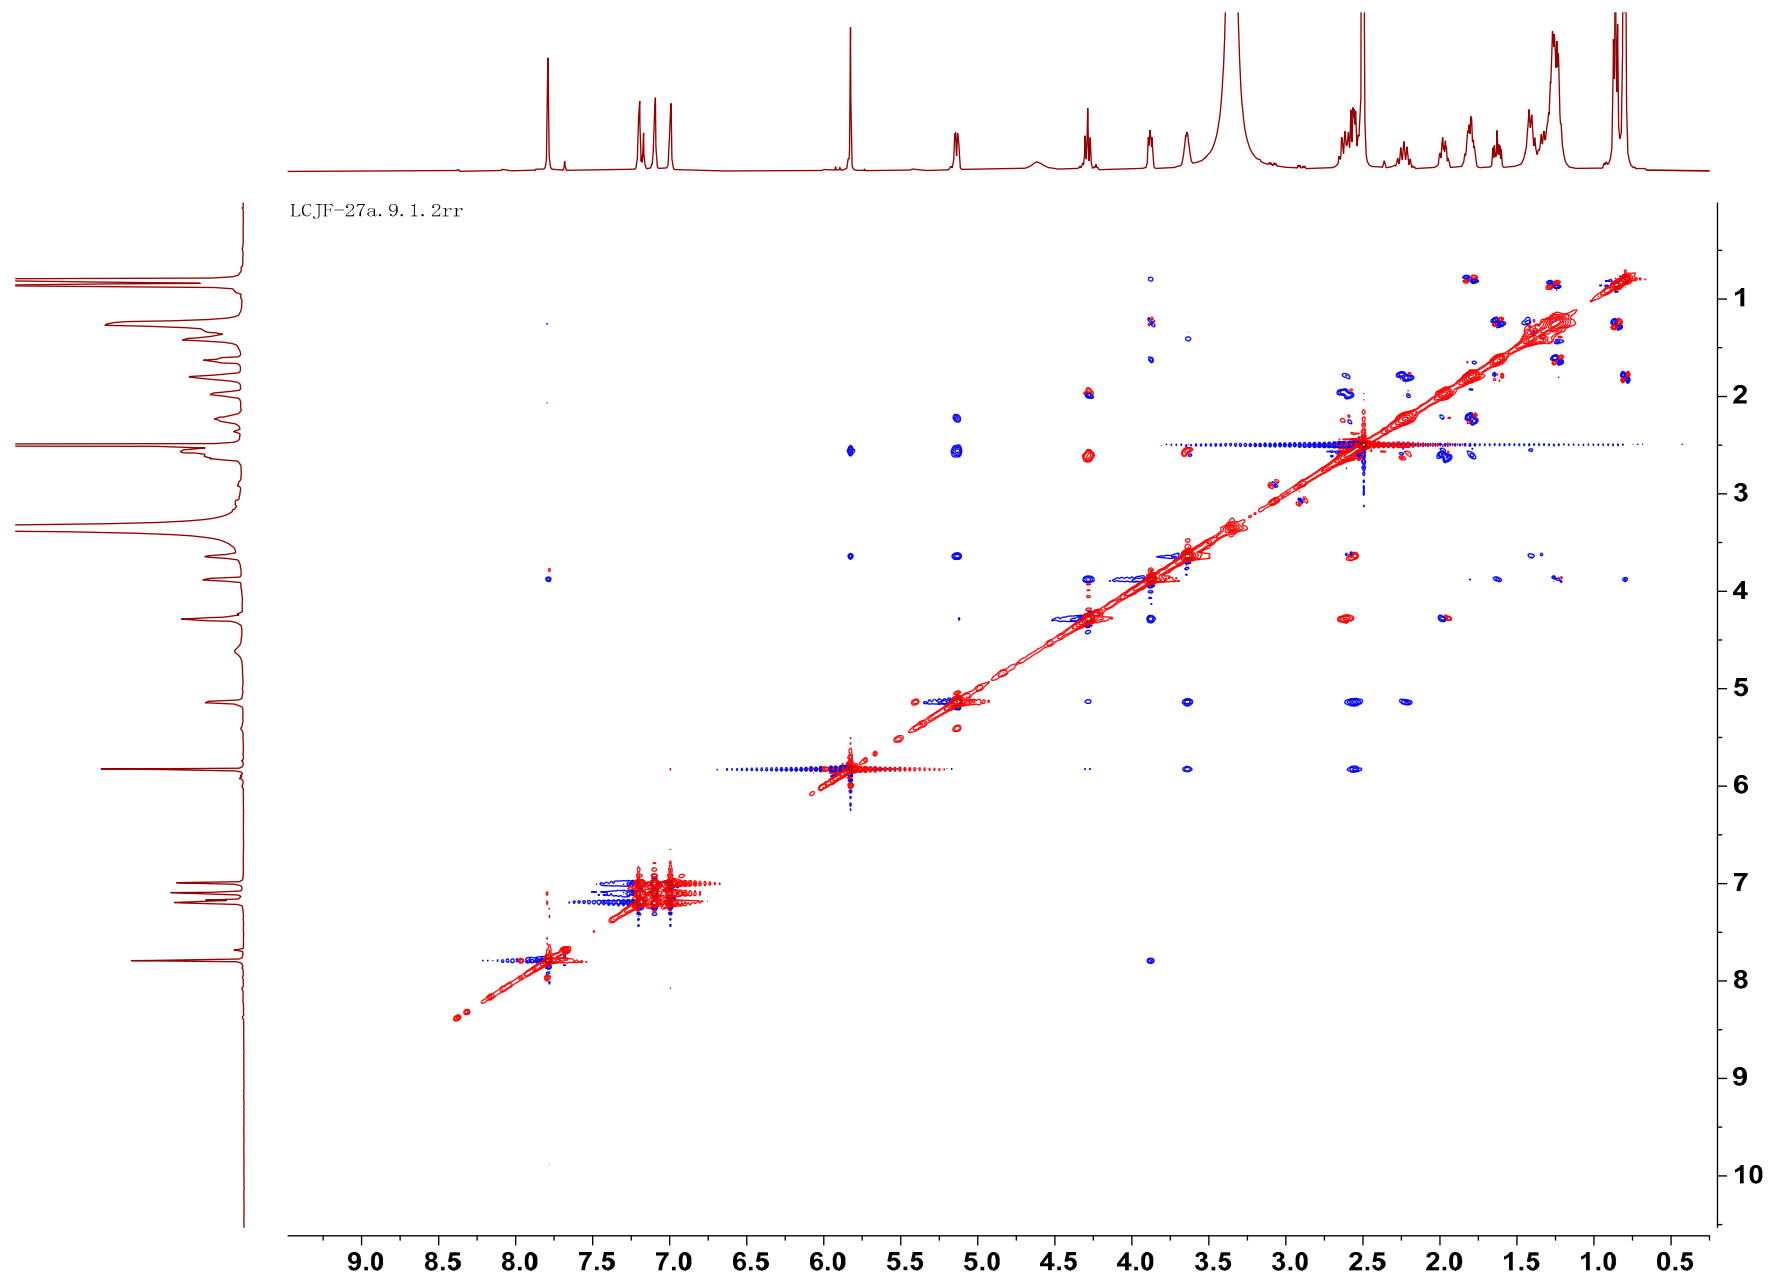

**Figure S15.** Enlarged ROESY spectrum of **2**.

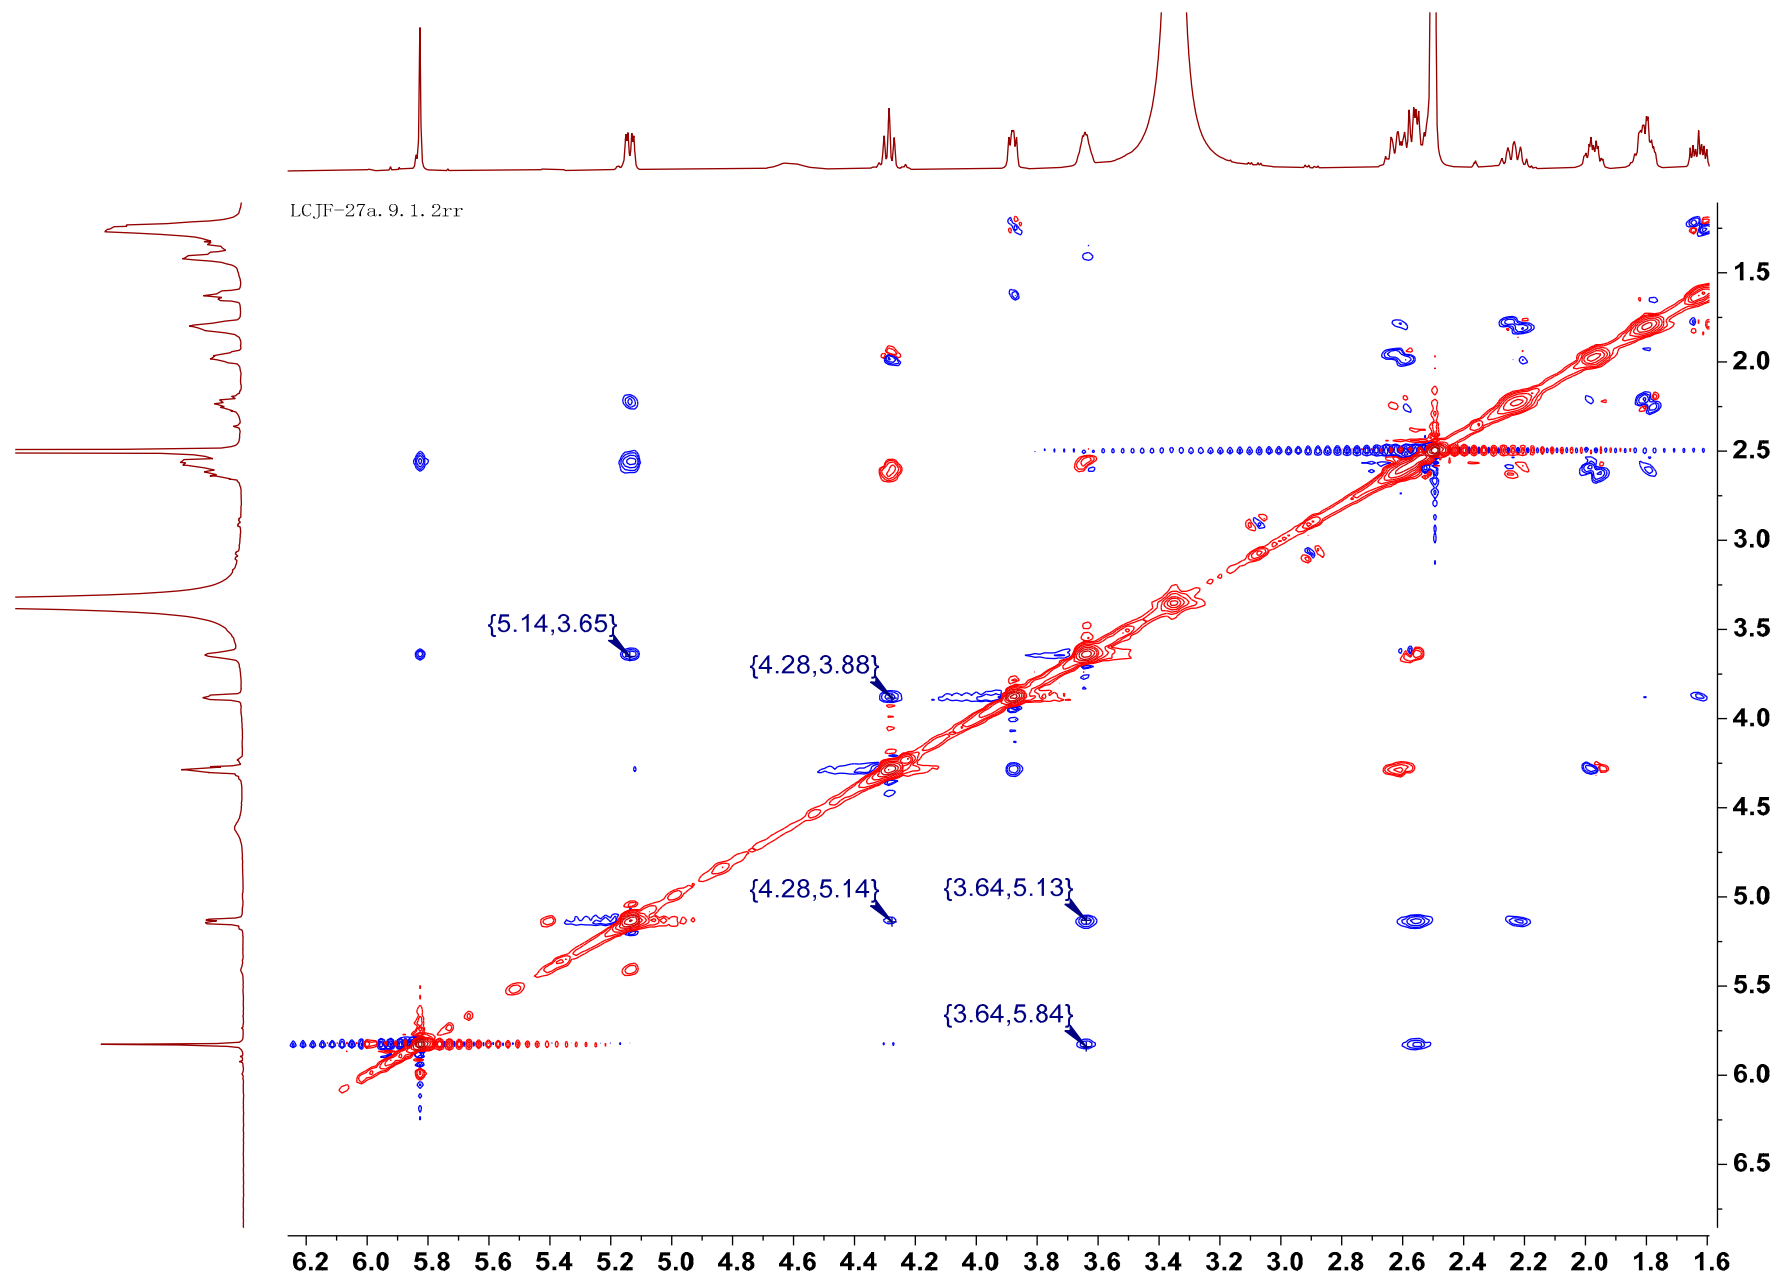

**Figure S16.** Entire and partly (+)-HRESIMS spectrum of **2**.

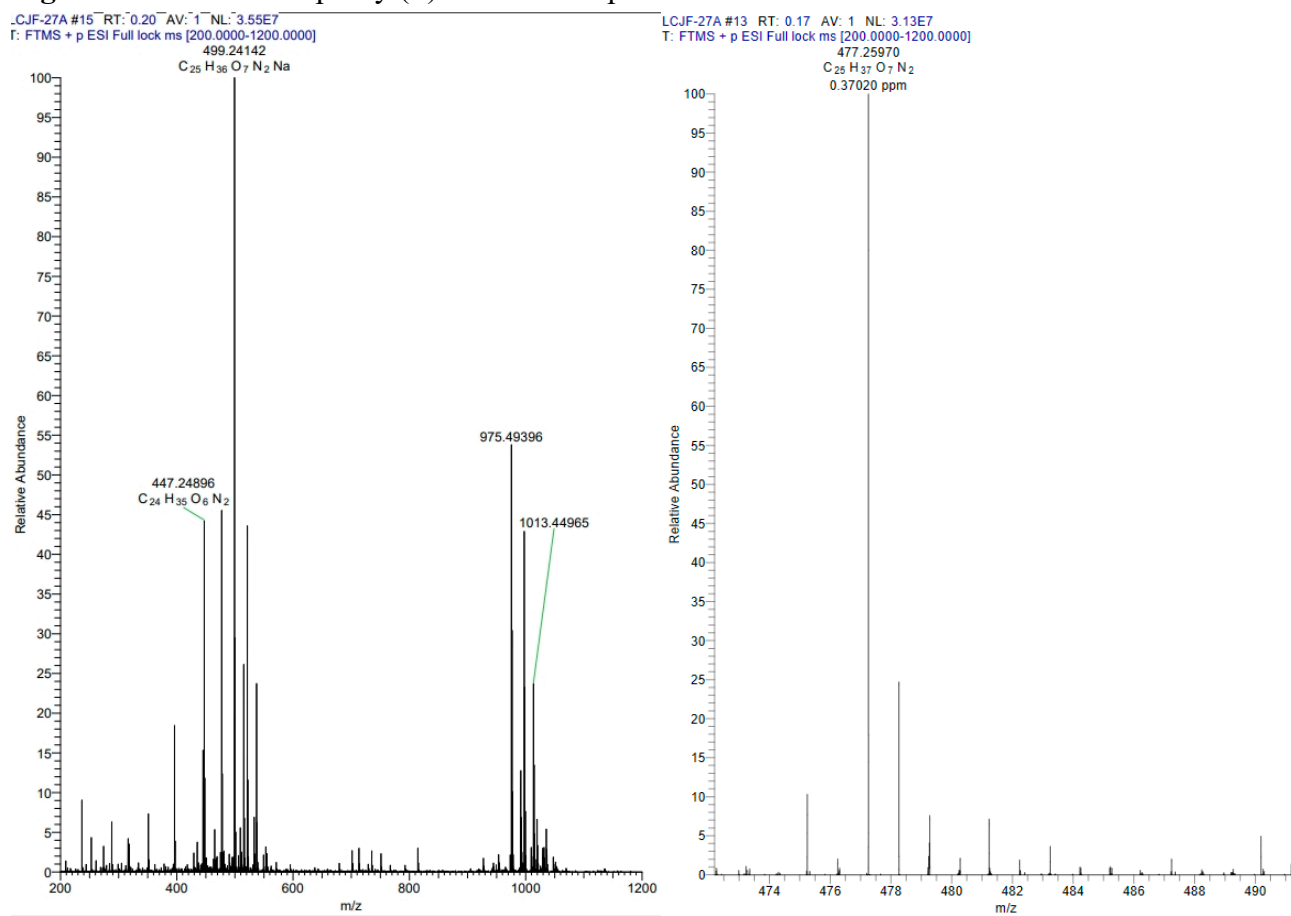

**Figure S17.** CD and UV spectra of compound **2**.

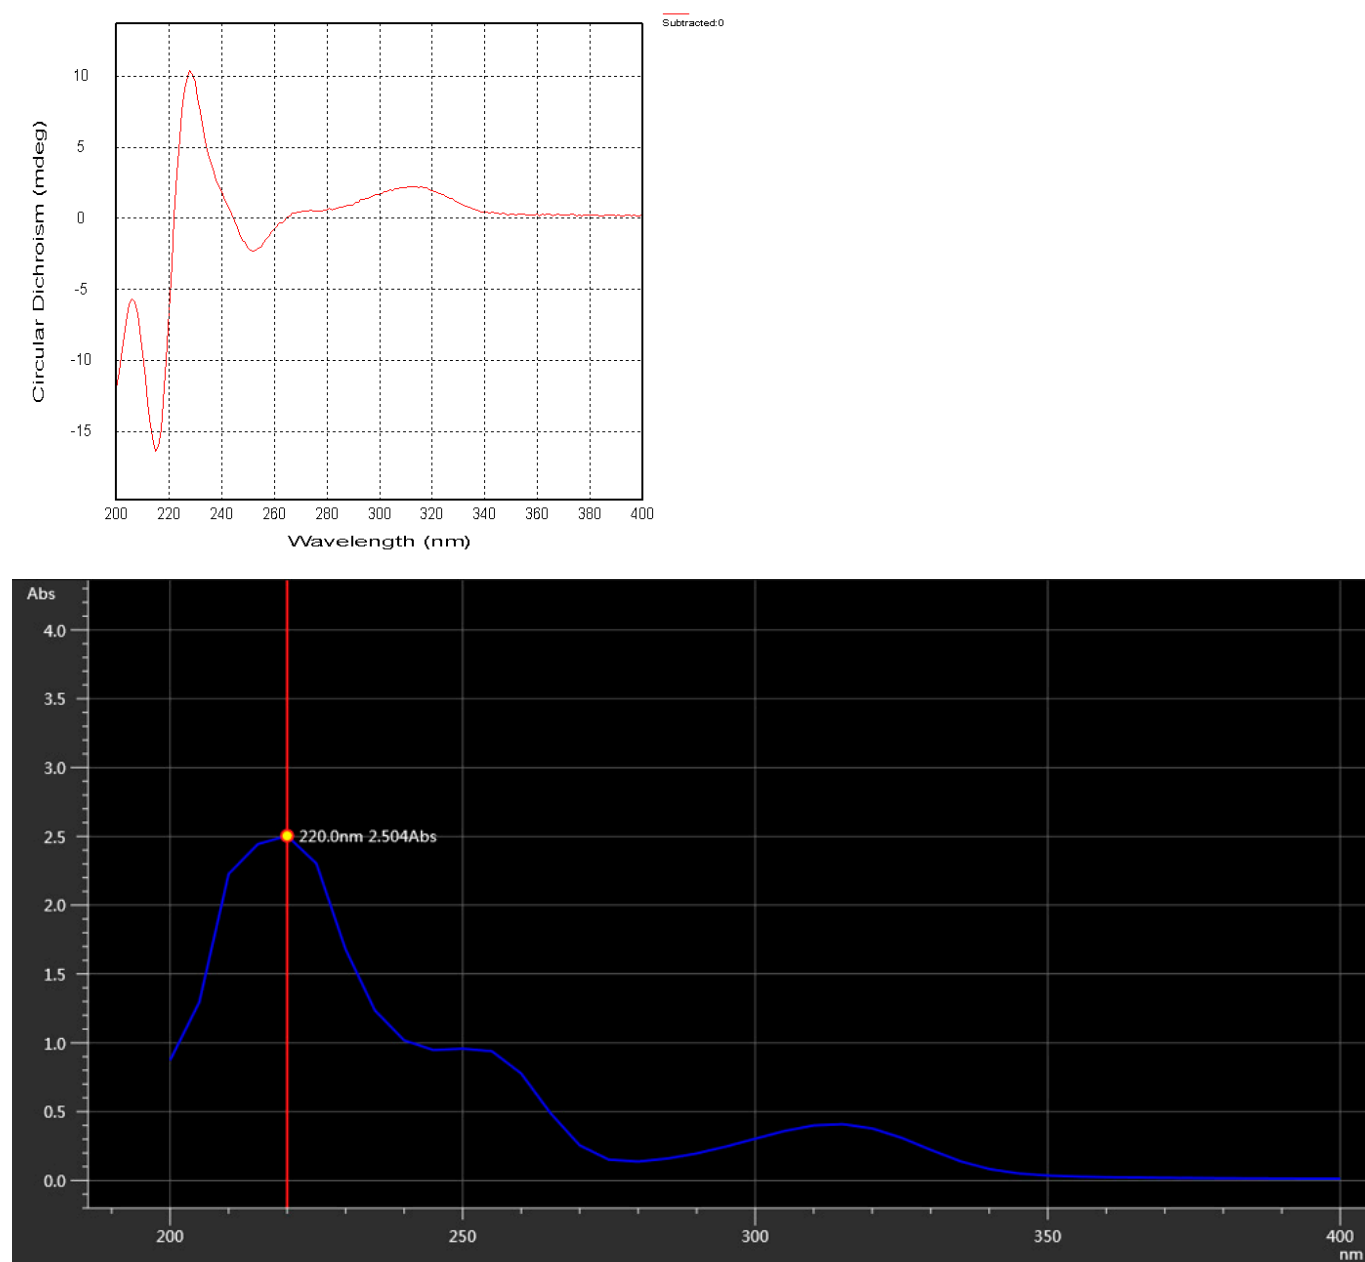

**Figure S18. Acetylcholinesterase Inhibitory activity of 1.**

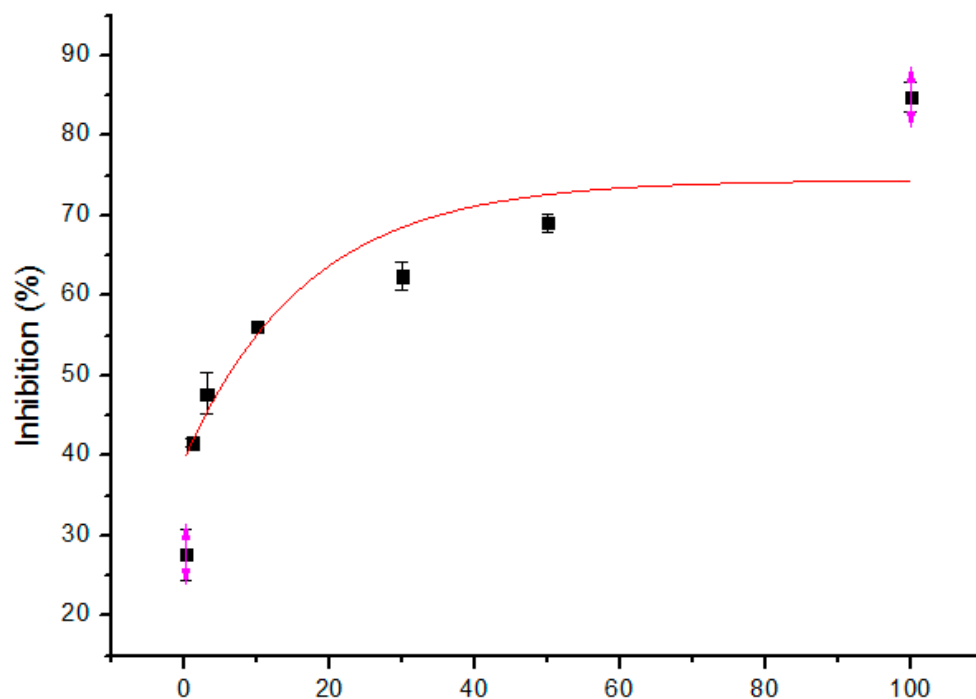

**Figure S19. LC-MS analysis of crude extract (TIC).**

RT: 0.00 - 55.02

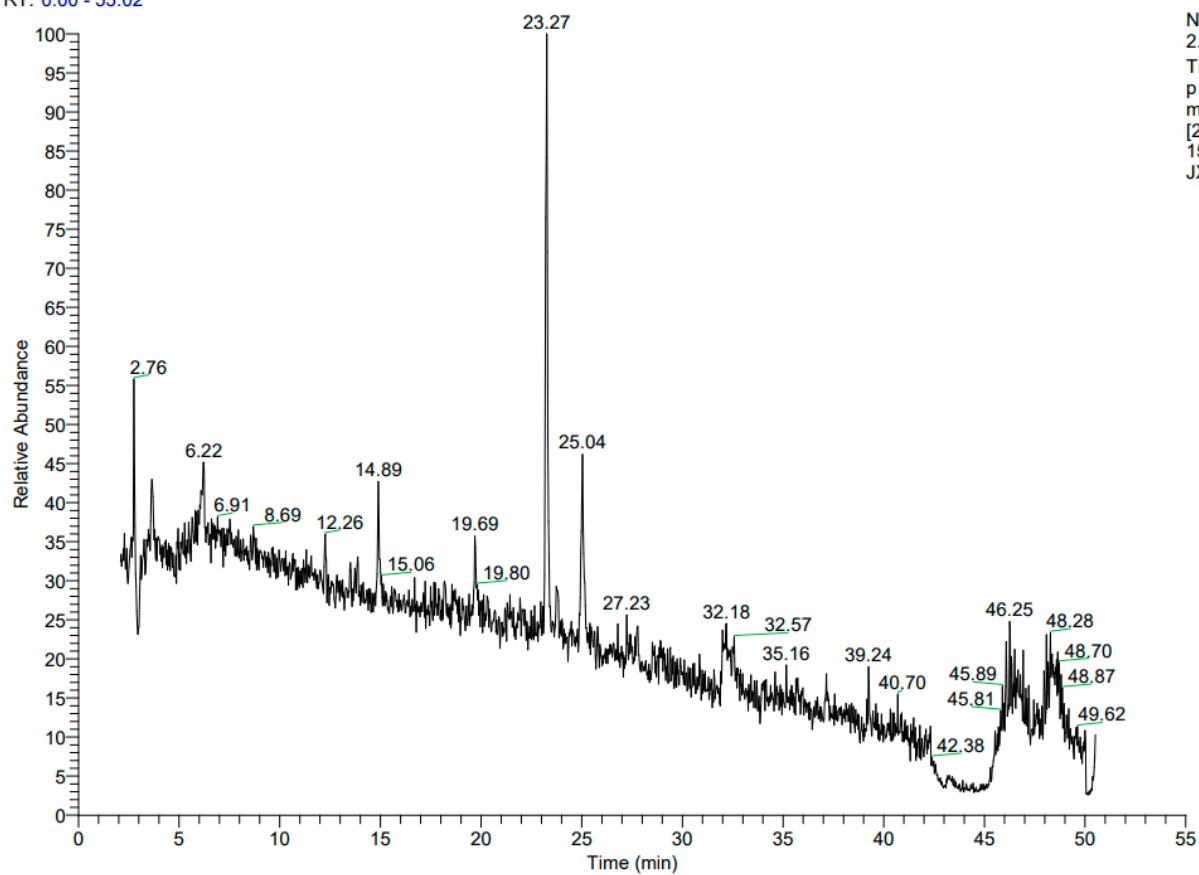

NL:  
2.13E9  
TIC F: FTMS +  
p ESI Full lock  
ms  
[200.0000-  
1500.0000] MS  
JX05

## S2. Computational Details

### S2.1 ECD calculation details of compound 1.

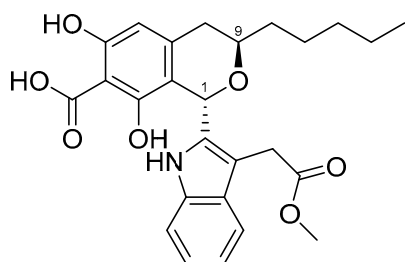

1*S*,9*R*-**1a**

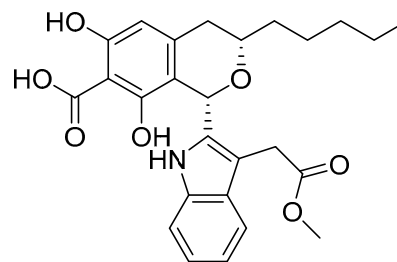

1*S*,9*S*-**1b**

Conformation searches based on molecular mechanics with MMFF94s force field were performed for **1a** and **1b** gave 17 and 23 conformers with populations higher than 1%, respectively. All these conformers were further optimized by the density functional theory method at the B3LYP/6-31G(d) level in Gaussian 16 program package, led to both 14 [**1aa–1an**] and 14 [**1ba–1bn**] conformers within a 3 kcal/mol energy threshold from global minimum, respectively. These predominant conformers were subjected to theoretical calculation of ECD using time-dependent density functional theory (TDDFT) at b3lyp/6-31g(d,p) level in MeOH with IEFPCM model. The calculated ECD curves for (1*S*,9*R*)-**1a** and (1*S*,9*S*)-**1b** were generated using SpecDis 1.71 with  $\sigma = 0.22$  eV, and UV shift +12 nm, and  $\sigma = 0.16$  eV, and UV shift -30 nm respectively

**Table S1.** Energy analysis for conformers of **1aa-1aq** and **1ba-1bw** at B3LYP/6-31G(d) level.

| Species    | Gibbs free energy | $\Delta E$ (kcal/mol) | $P_E\%$ |
|------------|-------------------|-----------------------|---------|
| <b>1aa</b> | -1589.152166      | 0.00                  | 21.4    |
| <b>1ab</b> | -1589.150637      | 0.96                  | 4.2     |
| <b>1ac</b> | -1589.150446      | 1.08                  | 3.5     |
| <b>1ad</b> | -1589.15021       | 1.23                  | 2.7     |
| <b>1ae</b> | -1589.150203      | 1.23                  | 2.7     |
| <b>1af</b> | -1589.152086      | 0.05                  | 19.7    |
| <b>1ag</b> | -1589.151944      | 0.14                  | 16.9    |
| <b>1ah</b> | -1589.150308      | 1.17                  | 3.0     |
| <b>1ai</b> | -1589.151409      | 0.48                  | 9.6     |
| <b>1aj</b> | -1589.150234      | 1.21                  | 2.8     |
| <b>1ak</b> | -1589.149687      | 1.56                  | 1.6     |
| <b>1al</b> | -1589.150492      | 1.05                  | 3.6     |
| <b>1am</b> | -1589.149301      | 1.80                  | 1.0     |
| <b>1an</b> | -1589.151141      | 0.64                  | 7.2     |
| <b>1ba</b> | -1589.15104       | 0.00                  | 21.1    |
| <b>1bb</b> | -1589.150214      | 0.52                  | 8.8     |
| <b>1bc</b> | -1589.150027      | 0.64                  | 7.2     |
| <b>1bd</b> | -1589.149058      | 1.24                  | 2.6     |
| <b>1be</b> | -1589.149475      | 0.98                  | 4.0     |
| <b>1bf</b> | -1589.149416      | 1.02                  | 3.8     |
| <b>1bg</b> | -1589.148629      | 1.51                  | 1.6     |
| <b>1bh</b> | -1589.149791      | 0.78                  | 5.6     |
| <b>1bi</b> | -1589.150866      | 0.11                  | 17.5    |
| <b>1bj</b> | -1589.149236      | 1.13                  | 3.1     |
| <b>1bk</b> | -1589.150865      | 0.11                  | 17.5    |
| <b>1bl</b> | -1589.149296      | 1.09                  | 3.3     |
| <b>1bm</b> | -1589.148803      | 1.40                  | 2.0     |
| <b>1bn</b> | -1589.1487        | 1.47                  | 1.8     |

## S2.2 NMR calculation details of compound 1.

The optimized conformers **1aa-1an** and **1ba-1bn** were further subjected to NMR calculation by using the Gauge-Independent Atomic Orbital (GIAO) method at mPW1PW91/6-31G+(d,p) level with PCM model in methanol in Gaussian 16 software package. The calculated NMR data of these conformers were averaged according to the Boltzmann distribution theory and their relative Gibbs free energy. The DP4+ analysis of the results were conducted on the EXCEL file provided by the publication on *J. Org. Chem.*, 2015, 80 (24), pp 12526–12534.

**Table S2. NMR calculation results of 1a at mPW1PW91/6-31+G(d,p)// B3LYP/6-31G(d) level of theory.**

| Shielding tensors   |          |          |          |          |          |          |          |          |          |          |          |          |          |          |        |
|---------------------|----------|----------|----------|----------|----------|----------|----------|----------|----------|----------|----------|----------|----------|----------|--------|
| No.                 | 1aa      | 1ab      | 1ac      | 1ad      | 1ae      | 1af      | 1ag      | 1ah      | 1ai      | 1aj      | 1ak      | 1al      | 1am      | 1an      | Scaled |
| 1                   | 126.8832 | 125.6641 | 125.5616 | 125.1037 | 125.1034 | 127.416  | 126.9796 | 125.6641 | 125.5091 | 127.8778 | 125.6624 | 125.442  | 128.2819 | 125.2923 | 127.0  |
| 2                   | 85.8437  | 83.7736  | 84.2939  | 85.0639  | 85.0655  | 85.2703  | 84.3965  | 83.7736  | 84.323   | 85.03    | 84.7401  | 85.2143  | 85.5254  | 84.5924  | 85.0   |
| 3                   | 41.5878  | 38.6002  | 42.5245  | 41.735   | 41.7312  | 37.8475  | 38.5567  | 38.6002  | 42.5198  | 42.3497  | 42.6511  | 38.124   | 38.077   | 38.5626  | 40.2   |
| 4                   | 100.8429 | 101.4803 | 101.3118 | 99.3837  | 99.3855  | 100.9141 | 100.6697 | 101.4803 | 101.1982 | 100.913  | 101.1871 | 99.3515  | 101.0388 | 99.002   | 100.8  |
| 5                   | 35.5625  | 40.0503  | 35.9916  | 36.4099  | 36.4122  | 39.2109  | 39.9053  | 40.0503  | 36.1897  | 35.426   | 35.6739  | 40.7549  | 39.3518  | 40.6898  | 37.5   |
| 6                   | 90.0637  | 90.6177  | 90.1763  | 90.5391  | 90.5392  | 90.4417  | 89.9201  | 90.6177  | 90.0931  | 90.0667  | 90.1881  | 90.5107  | 90.924   | 90.4496  | 90.2   |
| 7                   | 47.7452  | 46.6752  | 46.8439  | 48.6913  | 48.6956  | 47.4621  | 47.3043  | 46.6752  | 46.4674  | 48.3132  | 48.3355  | 49.6048  | 48.591   | 49.2864  | 47.8   |
| 8                   | 158.4028 | 158.3308 | 158.3812 | 158.5528 | 158.5512 | 158.4022 | 159.5229 | 158.3308 | 158.4169 | 158.5219 | 158.3703 | 158.7345 | 158.1191 | 158.5338 | 158.6  |
| 9                   | 130.2806 | 129.972  | 129.9696 | 130.3747 | 130.3768 | 130.1763 | 125.8333 | 129.972  | 130.2871 | 126.4287 | 130.5999 | 130.3613 | 130.1317 | 130.1351 | 128.9  |
| 10                  | 159.1235 | 158.1614 | 158.1446 | 158.897  | 158.8997 | 159.203  | 158.4128 | 158.1614 | 158.6435 | 158.0671 | 158.07   | 158.816  | 158.7545 | 158.8482 | 158.6  |
| 11                  | 168.741  | 168.2591 | 168.2857 | 168.5279 | 168.5285 | 168.7321 | 167.5742 | 168.2591 | 171.2273 | 166.4324 | 170.993  | 168.3661 | 168.985  | 171.5841 | 168.3  |
| 12                  | 164.6634 | 164.4296 | 164.4382 | 164.8395 | 164.8417 | 164.6729 | 160.9156 | 164.4296 | 166.447  | 161.0961 | 165.9025 | 164.7864 | 163.9576 | 166.6094 | 163.5  |
| 13                  | 169.5043 | 169.373  | 169.375  | 169.4623 | 169.4624 | 169.3719 | 169.4494 | 169.373  | 171.1886 | 168.9739 | 170.6789 | 169.4761 | 170.2092 | 171.4652 | 169.5  |
| 14                  | 180.7573 | 180.6365 | 180.6404 | 180.8513 | 180.8517 | 180.6854 | 180.3012 | 180.6365 | 182.5062 | 180.3098 | 182.6606 | 180.8036 | 180.6613 | 182.5786 | 180.7  |
| 15                  | 29.0499  | 28.7211  | 29.4581  | 28.2177  | 28.2211  | 28.6431  | 28.8098  | 28.7211  | 29.3427  | 29.1556  | 29.4413  | 28.8916  | 29.0168  | 28.9314  | 28.9   |
| 16                  | 60.5053  | 60.587   | 60.5688  | 61.3847  | 61.384   | 60.8578  | 60.9247  | 60.587   | 60.3184  | 60.6786  | 61.9252  | 61.9629  | 61.4624  | 61.3751  | 60.8   |
| 17                  | 89.1964  | 89.652   | 89.5808  | 89.1518  | 89.1511  | 89.0445  | 89.0952  | 89.652   | 89.7274  | 89.4889  | 88.4026  | 87.7411  | 88.756   | 87.8416  | 89.1   |
| 18                  | 69.5019  | 69.0177  | 68.9442  | 69.9911  | 69.9904  | 69.4608  | 69.7335  | 69.0177  | 68.8772  | 69.0299  | 69.9008  | 68.5285  | 69.392   | 69.1756  | 69.5   |
| 19                  | 79.6348  | 81.2082  | 81.1949  | 78.6836  | 78.6831  | 78.9531  | 79.6406  | 81.2082  | 81.2145  | 79.0489  | 79.2804  | 79.3292  | 77.1329  | 78.9074  | 79.4   |
| 20                  | 79.223   | 79.7448  | 79.7362  | 79.9313  | 79.9326  | 79.2653  | 79.3488  | 79.7448  | 79.917   | 79.9627  | 79.5875  | 79.8844  | 79.845   | 79.9915  | 79.5   |
| 21                  | 76.9442  | 76.565   | 76.5764  | 76.3437  | 76.3445  | 76.8823  | 77.2364  | 76.565   | 76.8339  | 77.28    | 75.7939  | 76.2702  | 76.9439  | 76.0559  | 76.9   |
| 22                  | 87.6083  | 87.3903  | 87.3789  | 87.4235  | 87.4254  | 87.6267  | 87.7311  | 87.3903  | 87.6044  | 87.4778  | 87.4424  | 87.5858  | 87.8053  | 88.1825  | 87.6   |
| 23                  | 65.3871  | 64.225   | 64.2121  | 64.27    | 64.2715  | 65.2444  | 64.6918  | 64.225   | 64.5271  | 65.451   | 63.8351  | 64.025   | 64.6967  | 63.5577  | 64.9   |
| 24                  | 163.0564 | 165.4942 | 165.493  | 164.2044 | 164.2006 | 161.9363 | 162.4256 | 165.4942 | 165.5909 | 163.805  | 163.6215 | 163.8661 | 162.6103 | 163.4048 | 163.0  |
| 25                  | 24.0321  | 23.9962  | 24.0333  | 25.1279  | 25.1296  | 24.7705  | 22.8905  | 23.9962  | 23.9719  | 24.9704  | 23.4537  | 25.4571  | 24.0437  | 25.351   | 24.1   |
| 25-OCH <sub>3</sub> | 143.6005 | 143.7833 | 143.7367 | 143.858  | 143.859  | 143.6293 | 143.4325 | 143.7833 | 143.6888 | 143.3343 | 143.4974 | 143.8565 | 143.1794 | 143.8744 | 143.6  |
| P                   | 0.21434  | 0.04244  | 0.03467  | 0.027    | 0.0268   | 0.19693  | 0.16943  | 0.02995  | 0.09614  | 0.02770  | 0.01552  | 0.03640  | 0.01031  | 0.07238  |        |

**Table S3. NMR calculation results of 1b at mPW1PW91/6-31+G(d,p)// B3LYP/6-31G(d) level of theory.**

| Shielding tensors   |          |          |          |          |          |          |          |          |          |          |          |          |          |          |        |
|---------------------|----------|----------|----------|----------|----------|----------|----------|----------|----------|----------|----------|----------|----------|----------|--------|
| No.                 | 1ba      | 1bb      | 1bc      | 1bd      | 1be      | 1bf      | 1bg      | 1bh      | 1bi      | 1bj      | 1bk      | 1bl      | 1bm      | 1bn      | Scaled |
| 1                   | 124.5793 | 121.8837 | 121.939  | 122.0249 | 121.9604 | 122.5838 | 122.499  | 123.0789 | 123.9558 | 122.4635 | 123.9707 | 122.4781 | 123.1236 | 122.444  | 123.4  |
| 2                   | 82.0708  | 82.4004  | 82.3966  | 82.2552  | 82.6088  | 82.2299  | 82.7486  | 82.4153  | 81.1381  | 81.8559  | 81.455   | 82.5063  | 82.1031  | 82.9452  | 81.9   |
| 3                   | 42.1014  | 40.556   | 41.1884  | 40.5479  | 38.0068  | 37.7205  | 41.8071  | 42.7619  | 42.6968  | 42.8224  | 42.1996  | 37.4814  | 38.4254  | 41.2154  | 41.5   |
| 4                   | 100.3869 | 99.884   | 99.5479  | 99.9843  | 100.5981 | 101.0042 | 100.834  | 100.8622 | 99.0836  | 100.463  | 100.2793 | 100.9164 | 101.2674 | 100.8081 | 100.1  |
| 5                   | 36.4578  | 36.5339  | 36.3774  | 36.4888  | 40.908   | 39.7694  | 35.8021  | 35.994   | 36.9731  | 35.9323  | 36.1451  | 40.1423  | 39.7533  | 36.2317  | 36.9   |
| 6                   | 90.6436  | 90.9763  | 91.2593  | 91.2177  | 90.9397  | 91.1711  | 90.7711  | 90.6176  | 91.0876  | 90.5625  | 90.8879  | 91.1951  | 91.1737  | 90.7887  | 90.9   |
| 7                   | 48.1158  | 50.2429  | 50.7253  | 50.3448  | 49.75    | 49.5733  | 49.2492  | 47.2516  | 49.6833  | 48.393   | 50.3972  | 47.9485  | 47.2948  | 47.8011  | 49.3   |
| 8                   | 157.0111 | 158.4597 | 158.6704 | 158.4687 | 157.9403 | 158.3842 | 158.4913 | 158.3381 | 157.5335 | 158.0489 | 158.2973 | 158.289  | 158.2063 | 158.2854 | 157.9  |
| 9                   | 120.9826 | 120.7899 | 120.9165 | 125.8065 | 121.0489 | 120.524  | 120.4037 | 120.2668 | 120.7788 | 120.5839 | 121.1956 | 124.0846 | 120.1719 | 124.1918 | 121.2  |
| 10                  | 157.5777 | 157.5369 | 157.3425 | 162.9894 | 157.5864 | 157.7449 | 157.7213 | 160.7788 | 159.7828 | 157.5568 | 159.571  | 160.0277 | 162.1991 | 159.8697 | 158.8  |
| 11                  | 168.8821 | 169.0632 | 169.0036 | 169.9791 | 169.0143 | 169.1946 | 169.1655 | 168.0191 | 167.2657 | 169.1182 | 167.8051 | 171.1528 | 172.8576 | 171.1708 | 168.6  |
| 12                  | 163.2178 | 163.2405 | 163.1946 | 166.5228 | 163.209  | 163.1556 | 163.1722 | 162.4109 | 162.431  | 163.1724 | 162.5917 | 165.3223 | 164.6027 | 165.324  | 163.1  |
| 13                  | 170.5612 | 170.5982 | 170.6263 | 172.6154 | 170.6243 | 170.6005 | 170.6284 | 171.7726 | 171.778  | 170.6918 | 171.7853 | 170.3342 | 174.9053 | 170.337  | 171.2  |
| 14                  | 182.22   | 182.3759 | 182.2385 | 180.1897 | 182.3465 | 182.4123 | 182.4016 | 180.0635 | 180.086  | 182.2232 | 180.1369 | 182.2626 | 183.6234 | 182.2488 | 181.4  |
| 15                  | 29.4731  | 29.0586  | 29.2123  | 29.4047  | 28.7909  | 28.8233  | 29.5103  | 29.4892  | 29.06    | 29.3808  | 28.7332  | 28.609   | 28.8507  | 29.2193  | 29.1   |
| 16                  | 60.9314  | 58.1437  | 58.3376  | 58.1641  | 59.4389  | 59.1707  | 58.9482  | 58.8334  | 60.2288  | 59.0859  | 60.2255  | 59.4971  | 58.6682  | 59.7389  | 59.7   |
| 17                  | 88.1554  | 92.435   | 92.2827  | 92.1086  | 90.3191  | 90.4434  | 90.6271  | 91.5149  | 89.6507  | 90.5428  | 89.74    | 91.0164  | 90.8642  | 91.7794  | 90.2   |
| 18                  | 70.051   | 69.0722  | 69.0246  | 68.4387  | 67.8541  | 68.2745  | 68.6489  | 69.254   | 69.7346  | 68.6459  | 69.9014  | 68.7749  | 69.1343  | 68.6491  | 69.4   |
| 19                  | 78.8712  | 80.5856  | 80.7754  | 80.7981  | 80.7249  | 79.4722  | 78.7527  | 80.0471  | 79.3911  | 78.4737  | 79.5304  | 80.1992  | 80.1387  | 80.0736  | 79.7   |
| 20                  | 79.3549  | 79.8041  | 79.6084  | 79.7629  | 79.5654  | 79.4968  | 79.521   | 79.7719  | 79.2809  | 79.4963  | 79.7701  | 79.6366  | 79.6602  | 79.8533  | 79.6   |
| 21                  | 76.6469  | 77.4091  | 77.429   | 77.5714  | 77.4825  | 77.0348  | 76.946   | 77.4744  | 76.7059  | 76.9133  | 77.0463  | 77.2734  | 77.3448  | 77.4255  | 77.0   |
| 22                  | 87.7223  | 87.5273  | 87.3488  | 87.3474  | 87.2644  | 87.6081  | 87.7863  | 87.7286  | 87.8091  | 87.5953  | 87.6998  | 87.5116  | 87.6759  | 87.443   | 87.6   |
| 23                  | 63.5515  | 64.921   | 64.9208  | 64.9937  | 64.5736  | 64.4378  | 64.6048  | 64.4807  | 63.8218  | 64.5968  | 64.0294  | 64.4103  | 64.3057  | 64.8886  | 64.2   |
| 24                  | 161.1868 | 165.3498 | 165.2293 | 164.984  | 164.9954 | 163.6836 | 163.4805 | 162.5846 | 161.5419 | 163.2013 | 161.4656 | 162.5525 | 162.5404 | 162.6755 | 162.6  |
| 25                  | 24.808   | 25.2453  | 25.3802  | 25.2342  | 24.0949  | 23.7632  | 23.8046  | 24.9691  | 21.9752  | 23.7472  | 21.9174  | 24.7287  | 24.8249  | 24.8401  | 23.8   |
| 25-OCH <sub>3</sub> | 143.5155 | 143.8133 | 143.8645 | 143.876  | 143.5254 | 143.7177 | 143.7324 | 143.9548 | 143.2372 | 143.7074 | 143.22   | 143.9413 | 143.917  | 143.9693 | 143.5  |
| P                   | 0.21093  | 0.08794  | 0.07214  | 0.02585  | 0.0402   | 0.03777  | 0.01641  | 0.05618  | 0.17543  | 0.03121  | 0.17524  | 0.03326  | 0.01973  | 0.01769  |        |

**Table S4. DP4+ analysis details of 1.**

| PCM-mPW1PW91/6-31G+(d,p)/ Shielding Tensors |      |              |        |        |
|---------------------------------------------|------|--------------|--------|--------|
| Nuclei                                      | Sp2? | experimental | 1a     | 1b     |
| 1C                                          | x    | 104.2        | 90.2   | 90.9   |
| 2C                                          | x    | 161.1        | 37.5   | 36.9   |
| 3C                                          | x    | 102.3        | 100.8  | 100.1  |
| 4C                                          | x    | 159          | 40.2   | 41.5   |
| 5C                                          | x    | 109.9        | 85.0   | 81.9   |
| 6C                                          | x    | 138.3        | 47.8   | 49.3   |
| 9C                                          | x    | 175.5        | 28.9   | 29.1   |
| 10C                                         |      | 34.1         | 158.6  | 157.9  |
| 11C                                         |      | 67.5         | 128.9  | 121.2  |
| 13C                                         | x    | 128.4        | 69.5   | 69.4   |
| 14C                                         | x    | 134.9        | 64.9   | 64.2   |
| 15C                                         | x    | 111.3        | 87.58  | 87.64  |
| 16C                                         | x    | 120.7        | 76.87  | 77.03  |
| 17C                                         | x    | 118.2        | 79.45  | 79.55  |
| 18C                                         | x    | 118.3        | 79.41  | 79.65  |
| 19C                                         |      | 13.9         | 180.70 | 181.36 |
| 20C                                         |      | 22.1         | 169.49 | 171.20 |
| 21C                                         |      | 31.1         | 163.50 | 163.14 |
| 22C                                         |      | 24.3         | 168.31 | 168.63 |
| 23C                                         |      | 35.4         | 158.63 | 158.83 |
| 24C                                         |      | 66.7         | 126.99 | 123.37 |
| 27C                                         | x    | 136.7        | 60.85  | 59.73  |
| 28C                                         | x    | 105.1        | 89.14  | 90.16  |
| 29C                                         |      | 29.2         | 162.98 | 162.58 |
| 30C                                         | x    | 171.9        | 24.13  | 23.78  |
| 33C                                         |      | 51.2         | 143.56 | 143.55 |
| 35H                                         | x    | 5.96         | 24.79  | 24.91  |
| 38H                                         |      | 2.56         | 28.88  | 28.94  |
| 39H                                         |      | 2.44         | 28.92  | 28.48  |
| 40H                                         |      | 3.58         | 27.74  | 27.78  |
| 41H                                         | x    | 7.27         | 23.94  | 23.86  |
| 42H                                         | x    | 7            | 24.02  | 24.02  |
| 43H                                         | x    | 6.92         | 24.06  | 24.07  |
| 44H                                         | x    | 7.38         | 23.45  | 23.49  |
| 45H                                         |      | 0.69         | 30.98  | 30.70  |
| 48H                                         |      | 1.14         | 30.41  | 30.19  |
| 50H                                         |      | 1            | 30.84  | 30.24  |
| 52H                                         |      | 1.16         | 30.39  | 30.31  |
| 53H                                         |      | 1.22         | 30.09  | 29.74  |
| 54H                                         |      | 1.39         | 30.18  | 30.03  |
| 55H                                         |      | 1.35         | 29.84  | 29.95  |
| 56H                                         |      | 5.97         | 24.98  | 25.33  |
| 58H                                         |      | 3.51         | 27.65  | 27.63  |
| 59H                                         |      | 3.56         | 27.59  | 27.63  |
| 60H                                         |      | 3.5          | 27.84  | 27.86  |

## S2.2 NMR calculation details of compound 2.

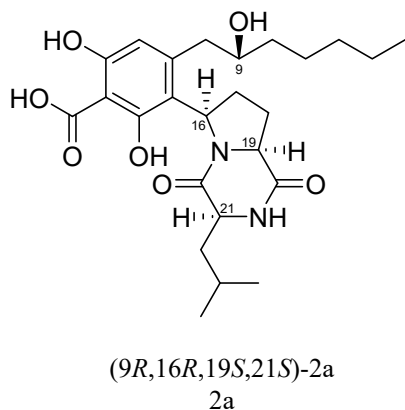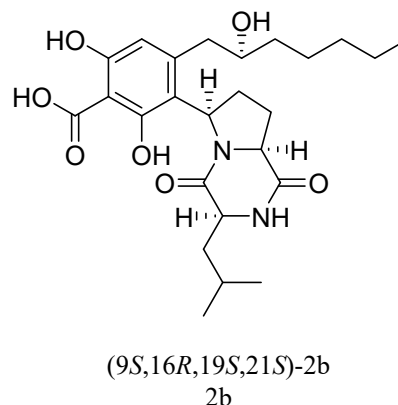

Conformation searches based on molecular mechanics with MMFF94s force field were performed for **2a** and **2b** gave 14 and 24 conformers with populations higher than 1%, respectively. All these conformers were further optimized by the density functional theory method at the B3LYP/6-31G(d) level in Gaussian 16 program package, led to both 8 [**1aa–1ah**] and 9 [**1ba–1bi**] conformers within a 3 kcal/mol energy threshold from global minimum, respectively. These predominant conformers were subjected to NMR calculation by using the Gauge-Independent Atomic Orbital (GIAO) method at mPW1PW91/6-31G+(d,p) level with PCM model in methanol in Gaussian 16 software package. The calculated NMR data of these conformers were averaged according to the Boltzmann distribution theory and their relative Gibbs free energy. The DP4+ analysis of the results were conducted on the EXCEL file provided by the publication on *J. Org. Chem.*, 2015, 80 (24), pp 12526–12534.

**Table S5. Energy analysis for conformers of 2aa-2ah and 2ba-2bi at B3LYP/6-31G(d) level.**

| Species    | Gibbs free energy | $\Delta E$ (kcal/mol) | $P_E\%$ |
|------------|-------------------|-----------------------|---------|
| <b>2aa</b> | -1609.958315      | 0.00                  | 54.0    |
| <b>2ab</b> | -1609.957518      | 0.50                  | 23.2    |
| <b>2ac</b> | -1609.955114      | 2.01                  | 1.8     |
| <b>2ad</b> | -1609.954712      | 2.26                  | 1.2     |
| <b>2ae</b> | -1609.955493      | 1.77                  | 2.7     |
| <b>2af</b> | -1609.955557      | 1.72                  | 3.0     |
| <b>2ag</b> | -1609.95618       | 1.34                  | 5.6     |
| <b>2ah</b> | -1609.956557      | 1.10                  | 8.4     |
| <b>2ba</b> | -1609.956439      | 0.00                  | 41.1    |
| <b>2bb</b> | -1609.953328      | 1.95                  | 1.5     |
| <b>2bc</b> | -1609.955839      | 0.38                  | 21.8    |
| <b>2bd</b> | -1609.952984      | 2.17                  | 1.1     |
| <b>2be</b> | -1609.953925      | 1.58                  | 2.9     |
| <b>2bf</b> | -1609.954359      | 1.31                  | 4.5     |
| <b>2bg</b> | -1609.954664      | 1.11                  | 6.3     |
| <b>2bh</b> | -1609.955006      | 0.90                  | 9.0     |
| <b>2bi</b> | -1609.955266      | 0.74                  | 11.9    |

**Table S6. NMR calculation results of 2a at mPW1PW91/6-31+G(d,p)// B3LYP/6-31G(d) level of theory.**

| Shielding tensors |          |          |          |          |          |          |          |          |        |
|-------------------|----------|----------|----------|----------|----------|----------|----------|----------|--------|
| GV No.            | 2aa      | 2ab      | 2ac      | 2ad      | 2ae      | 2af      | 2ag      | 2ah      | Scaled |
| 2                 | 77.1758  | 77.4183  | 77.331   | 77.4032  | 76.942   | 78.0212  | 77.6376  | 77.5305  | 77.3   |
| 3                 | 37.019   | 41.0831  | 36.4036  | 40.4143  | 36.6025  | 40.7613  | 36.7618  | 40.9981  | 38.4   |
| 4                 | 100.7545 | 100.5636 | 101.1082 | 101.0527 | 101.1914 | 100.8267 | 100.9868 | 100.5745 | 100.7  |
| 5                 | 40.4777  | 36.4491  | 39.1302  | 34.9923  | 39.0351  | 36.0755  | 39.9698  | 35.9965  | 38.9   |
| 6                 | 88.1784  | 87.6688  | 88.2365  | 87.7602  | 88.3412  | 87.8613  | 88.3284  | 88.1258  | 88.1   |
| 7                 | 44.1422  | 43.8848  | 44.4065  | 43.828   | 43.9454  | 43.3788  | 43.6218  | 44.0683  | 44.0   |
| 8                 | 148.3905 | 148.3752 | 148.5696 | 148.6312 | 148.58   | 151.4786 | 151.4997 | 148.2681 | 148.7  |
| 9                 | 119.8014 | 119.7658 | 120.1777 | 119.8916 | 119.9445 | 121.1178 | 121.1336 | 123.6569 | 120.2  |
| 10                | 154.9655 | 154.9362 | 155.0995 | 155.0861 | 155.0922 | 155.125  | 155.2189 | 156.2098 | 155.1  |
| 11                | 165.485  | 165.4832 | 165.4912 | 165.4902 | 165.4723 | 171.4382 | 171.4223 | 168.0566 | 166.2  |
| 12                | 161.1703 | 161.1734 | 161.1919 | 161.1863 | 161.1835 | 160.6436 | 160.6373 | 163.9444 | 161.4  |
| 13                | 169.4015 | 169.4026 | 169.4189 | 169.4158 | 169.4093 | 169.304  | 169.3083 | 169.095  | 169.4  |
| 14                | 180.1615 | 180.1612 | 180.1212 | 180.1632 | 180.1695 | 180.2143 | 180.2208 | 180.1591 | 180.2  |
| 15                | 28.6911  | 29.3744  | 28.588   | 29.2961  | 28.5515  | 29.3655  | 28.6395  | 29.4183  | 28.9   |
| 16                | 135.1853 | 134.9985 | 135.2369 | 134.8745 | 135.1423 | 134.8112 | 135.0499 | 134.8724 | 135.1  |
| 17                | 162.8766 | 162.7231 | 162.8261 | 162.8615 | 162.8545 | 162.6386 | 162.7123 | 162.7806 | 162.8  |
| 18                | 164.6464 | 164.897  | 165.1412 | 165.026  | 164.8571 | 165.0434 | 164.7425 | 164.914  | 164.8  |
| 19                | 133.1285 | 133.1477 | 132.9392 | 133.0004 | 132.8588 | 133.3529 | 133.387  | 133.2314 | 133.2  |
| 20                | 29.4191  | 29.1778  | 29.5808  | 30.3279  | 30.4909  | 29.1275  | 29.3896  | 29.1093  | 29.4   |
| 21                | 140.257  | 140.2582 | 138.8161 | 137.598  | 137.6612 | 140.3169 | 140.3008 | 140.1804 | 140.1  |
| 22                | 32.4471  | 32.2724  | 32.1643  | 32.7244  | 32.7724  | 32.3405  | 32.4429  | 32.2861  | 32.4   |
| 23                | 156.8889 | 157.1218 | 160.3054 | 156.8912 | 156.8145 | 156.9013 | 156.5927 | 157.1432 | 157.0  |
| 24                | 168.8416 | 168.7594 | 168.6596 | 168.5962 | 168.5358 | 168.8253 | 168.837  | 168.6665 | 168.8  |
| 25                | 171.9618 | 171.9879 | 175.8089 | 171.3682 | 171.3187 | 171.9124 | 171.9315 | 171.9766 | 172.0  |
| 26                | 176.7114 | 176.7028 | 171.8577 | 174.0963 | 174.2192 | 176.6251 | 176.6726 | 176.6568 | 176.5  |
| P                 | 0.23237  | 0.01821  | 0.54049  | 0.01190  | 0.02721  | 0.02952  | 0.05633  | 0.08397  |        |

**Table S7. NMR calculation results of 2d at mPW1PW91/6-31+G(d,p)// B3LYP/6-31G(d) level of theory.**

| Isotropic values |          |          |          |          |          |          |          |          |          |        |
|------------------|----------|----------|----------|----------|----------|----------|----------|----------|----------|--------|
| GV No.           | 2ba      | 2bb      | 2bc      | 2bd      | 2be      | 2bf      | 2bg      | 2bh      | 2bi      | Scaled |
| 1C               | 76.7888  | 76.2285  | 77.0974  | 76.6676  | 76.437   | 77.1596  | 77.288   | 76.8312  | 76.9918  | 76.9   |
| 2C               | 36.651   | 36.6589  | 40.6834  | 40.4325  | 36.5046  | 40.5239  | 40.4039  | 36.6036  | 36.4099  | 37.9   |
| 3C               | 100.5601 | 100.7644 | 100.2802 | 100.5113 | 100.8163 | 100.3871 | 100.3887 | 100.6549 | 100.5927 | 100.5  |
| 4C               | 41.1697  | 40.8138  | 37.1581  | 36.85    | 40.7931  | 36.8453  | 37.2766  | 40.9804  | 41.2819  | 39.8   |
| 5C               | 87.0343  | 86.6974  | 86.5424  | 86.0817  | 86.7334  | 86.2437  | 85.6259  | 86.7845  | 86.0086  | 86.6   |
| 6C               | 45.7227  | 45.6154  | 45.4826  | 45.4478  | 45.5963  | 45.9422  | 46.4758  | 46.1489  | 46.7186  | 45.9   |
| 7C               | 150.169  | 150.3265 | 150.0996 | 150.4217 | 150.3904 | 149.9559 | 150.3045 | 149.9977 | 150.386  | 150.2  |
| 12C              | 121.1018 | 121.2968 | 121.1481 | 121.0951 | 121.1197 | 120.8659 | 120.8352 | 120.8438 | 120.8339 | 121.0  |
| 13C              | 158.14   | 158.1513 | 158.2103 | 158.0885 | 158.0761 | 160.1935 | 158.1748 | 160.1519 | 158.087  | 158.4  |
| 15C              | 165.5703 | 165.6243 | 165.5711 | 165.5871 | 165.5948 | 166.4383 | 165.5152 | 166.4431 | 165.5323 | 165.7  |
| 16C              | 161.3047 | 161.346  | 161.3205 | 161.3171 | 161.2925 | 162.2403 | 161.2782 | 162.2325 | 161.2881 | 161.4  |
| 17C              | 169.3296 | 169.3499 | 169.3216 | 169.3921 | 169.4054 | 171.6386 | 169.381  | 171.6542 | 169.3793 | 169.7  |
| 18C              | 180.2736 | 180.1152 | 180.2791 | 180.098  | 180.1036 | 180.0725 | 180.1942 | 180.0666 | 180.1813 | 180.2  |
| 19C              | 28.6543  | 28.8022  | 29.2927  | 29.3728  | 28.675   | 29.2977  | 29.3027  | 28.7197  | 28.7624  | 28.9   |
| 21C              | 134.4557 | 134.7626 | 134.3005 | 134.5379 | 134.6662 | 134.4951 | 134.5983 | 134.6343 | 134.7207 | 134.5  |
| 22C              | 162.8232 | 162.687  | 162.7091 | 162.7244 | 162.7073 | 162.6425 | 162.2257 | 162.733  | 162.2637 | 162.7  |
| 23C              | 164.8773 | 165.0938 | 165.1369 | 164.9103 | 164.7737 | 165.216  | 165.3966 | 164.8881 | 165.0286 | 165.0  |
| 24C              | 133.2295 | 132.8999 | 133.3109 | 133.0931 | 132.9764 | 133.0764 | 132.9154 | 133.0996 | 132.9055 | 133.2  |
| 26C              | 29.411   | 29.6071  | 29.187   | 30.299   | 30.454   | 29.0837  | 28.4365  | 29.3707  | 28.5165  | 29.2   |
| 27C              | 140.3386 | 138.7934 | 140.3659 | 137.7337 | 137.6528 | 140.2083 | 140.842  | 140.1048 | 140.9438 | 140.3  |
| 29C              | 32.0649  | 31.8592  | 31.9194  | 32.3409  | 32.3546  | 31.9417  | 30.7791  | 32.1595  | 30.9157  | 31.8   |
| 30C              | 156.6592 | 160.3024 | 156.9708 | 156.8678 | 156.7844 | 156.8445 | 154.5452 | 156.6168 | 154.3337 | 156.4  |
| 31C              | 168.7348 | 168.6447 | 168.6477 | 168.5224 | 168.4223 | 168.8496 | 167.1341 | 168.8988 | 167.1563 | 168.4  |
| 33C              | 171.9805 | 175.7285 | 171.9628 | 171.4404 | 171.3139 | 171.9487 | 176.1043 | 171.8952 | 176.0932 | 172.7  |
| 34C              | 176.7004 | 171.8514 | 176.6591 | 174.1066 | 174.2177 | 176.5403 | 172.4188 | 176.5647 | 172.4591 | 175.7  |
| P                | 0.41098  | 0.01523  | 0.21769  | 0.01058  | 0.02867  | 0.04540  | 0.06271  | 0.09009  | 0.11865  |        |

**Table S8. DP4+ analysis details of 2.**

| PCM-mPW1PW91/6-31G+(d,p)/ Shielding Tensors |      |              |       |       |
|---------------------------------------------|------|--------------|-------|-------|
| Nuclei                                      | Sp2? | experimental | 2a    | 2b    |
| 1C                                          | x    | 106.7        | 88.1  | 86.6  |
| 2C                                          | x    | 160.3        | 38.9  | 39.8  |
| 3C                                          | x    | 102.7        | 100.7 | 100.5 |
| 4C                                          | x    | 160.3        | 38.4  | 37.9  |
| 5C                                          | x    | 115.4        | 77.3  | 76.9  |
| 6C                                          | x    | 141.6        | 44.0  | 45.9  |
| 7C                                          | x    | 175.5        | 28.9  | 28.9  |
| 12C                                         |      | 42.4         | 148.7 | 150.2 |
| 13C                                         |      | 71.9         | 120.2 | 121.0 |
| 15C                                         |      | 37.0         | 155.1 | 158.4 |
| 16C                                         |      | 25.1         | 166.2 | 165.7 |
| 17C                                         |      | 31.5         | 161.4 | 161.4 |
| 18C                                         |      | 22.2         | 169.4 | 169.7 |
| 19C                                         |      | 14.0         | 180.2 | 180.2 |
| 21C                                         |      | 21.7         | 176.5 | 175.7 |
| 22C                                         |      | 22.9         | 172.0 | 172.7 |
| 23C                                         | x    | 170.9        | 29.4  | 29.2  |
| 24C                                         |      | 60.0         | 133.2 | 133.2 |
| 26C                                         | x    | 166.2        | 32.4  | 31.8  |
| 27C                                         |      | 52.9         | 140.1 | 140.3 |
| 29C                                         |      | 26.1         | 164.8 | 165.0 |
| 30C                                         |      | 31.1         | 162.8 | 162.7 |
| 31C                                         |      | 55.8         | 135.1 | 134.5 |
| 33C                                         |      | 37.8         | 157.0 | 156.4 |
| 34C                                         |      | 24.0         | 168.8 | 168.4 |
| 35H                                         | x    | 5.82         | 24.99 | 25.05 |
| 39H                                         |      | 2.55         | 28.90 | 28.61 |
| 41H                                         |      | 3.63         | 27.66 | 27.67 |
| 43H                                         |      | 1.32         | 30.10 | 30.39 |
| 44H                                         |      | 1.40         | 30.04 | 30.06 |
| 45H                                         |      | 1.28         | 29.85 | 30.32 |
| 46H                                         |      | 1.41         | 30.28 | 29.89 |
| 47H                                         |      | 1.25         | 30.33 | 30.37 |
| 49H                                         |      | 1.27         | 30.23 | 30.26 |
| 51H                                         |      | 0.86         | 30.63 | 30.67 |
| 54H                                         |      | 0.81         | 30.68 | 30.68 |
| 57H                                         |      | 0.80         | 30.66 | 30.66 |
| 60H                                         |      | 4.29         | 27.05 | 27.07 |
| 61H                                         |      | 3.88         | 27.38 | 27.38 |
| 63H                                         |      | 1.98         | 29.40 | 29.41 |
| 64H                                         |      | 2.63         | 28.76 | 28.74 |
| 65H                                         |      | 2.24         | 28.93 | 28.91 |
| 66H                                         |      | 1.79         | 29.68 | 29.70 |
| 67H                                         |      | 5.14         | 25.39 | 25.31 |
| 68H                                         |      | 1.63         | 29.77 | 29.75 |
| 69H                                         |      | 1.24         | 30.23 | 30.31 |
| 70H                                         |      | 1.81         | 29.90 | 29.78 |

### S2.3 Standard orientations.

#### Standard orientations of 1aa

|   |          |          |          |
|---|----------|----------|----------|
| C | 3.65897  | 2.16753  | 0.25562  |
| C | 4.54475  | 1.10285  | 0.40183  |
| C | 4.12161  | -0.23063 | 0.09652  |
| C | 2.78005  | -0.42347 | -0.34940 |
| C | 1.90031  | 0.65981  | -0.48538 |
| C | 2.35438  | 1.95531  | -0.19150 |
| O | 2.26549  | -1.63079 | -0.66536 |
| O | 5.78477  | 1.38178  | 0.83408  |
| C | 5.09177  | -1.30237 | 0.25499  |
| C | 1.43160  | 3.13727  | -0.40301 |
| C | -0.03324 | 2.71603  | -0.54899 |
| O | -0.10216 | 1.63322  | -1.48249 |
| C | -2.12800 | -1.26247 | 1.12061  |
| C | -1.12138 | -0.93266 | 2.07048  |
| C | -1.24789 | -1.23732 | 3.42996  |
| C | -2.40913 | -1.88366 | 3.83734  |
| C | -3.42001 | -2.22151 | 2.91293  |
| C | -3.29016 | -1.92006 | 1.56334  |
| C | -5.34090 | 2.41972  | 1.15622  |
| C | -4.62933 | 2.85146  | -0.13019 |
| C | -3.12890 | 3.10628  | 0.06686  |
| C | -2.40686 | 3.48401  | -1.23386 |
| C | -0.92156 | 3.84493  | -1.07039 |
| C | 0.48291  | 0.42040  | -0.98845 |
| O | 4.64071  | -2.55357 | -0.06104 |
| O | 6.25290  | -1.17331 | 0.64091  |
| C | -0.42231 | -0.23523 | 0.03606  |
| C | -1.66455 | -0.80066 | -0.16102 |
| C | -2.38248 | -0.91959 | -1.48152 |
| C | -2.04028 | -2.23069 | -2.17127 |
| O | -1.07595 | -2.41220 | -2.88378 |
| O | -2.93235 | -3.19943 | -1.86154 |
| C | -2.64454 | -4.49682 | -2.40706 |
| N | -0.10745 | -0.30067 | 1.38299  |
| H | 4.01545  | 3.16585  | 0.48802  |
| H | 2.94589  | -2.32271 | -0.57083 |
| H | 6.29020  | 0.53473  | 0.87990  |
| H | 1.54681  | 3.85440  | 0.41966  |
| H | 1.74224  | 3.65868  | -1.31989 |
| H | -0.40828 | 2.37280  | 0.42710  |
| H | -0.46865 | -0.97781 | 4.14216  |
| H | -2.53954 | -2.13441 | 4.88655  |
| H | -4.31271 | -2.73070 | 3.26610  |
| H | -4.06482 | -2.20213 | 0.85549  |

|   |          |          |          |
|---|----------|----------|----------|
| H | -5.24504 | 3.18371  | 1.93790  |
| H | -6.41068 | 2.25231  | 0.98513  |
| H | -4.91495 | 1.48866  | 1.54944  |
| H | -4.76424 | 2.07707  | -0.89900 |
| H | -5.10385 | 3.75986  | -0.52853 |
| H | -2.67421 | 2.20429  | 0.49753  |
| H | -2.99285 | 3.90716  | 0.81017  |
| H | -2.91723 | 4.34422  | -1.68957 |
| H | -2.49290 | 2.65912  | -1.95152 |
| H | -0.81954 | 4.69755  | -0.38354 |
| H | -0.52076 | 4.17141  | -2.03957 |
| H | 0.51740  | -0.23855 | -1.86109 |
| H | 5.38702  | -3.16494 | 0.08513  |
| H | -3.46517 | -0.85829 | -1.33225 |
| H | -2.07803 | -0.10912 | -2.14839 |
| H | -2.62255 | -4.45844 | -3.49952 |
| H | -3.45023 | -5.14561 | -2.06196 |
| H | -1.67824 | -4.85870 | -2.04556 |
| H | 0.77532  | -0.00198 | 1.76934  |

Standard orientations of **1ab**

|   |          |          |          |
|---|----------|----------|----------|
| C | 3.01106  | 1.91330  | 0.67167  |
| C | 4.06222  | 1.08978  | 0.28431  |
| C | 3.84830  | 0.08023  | -0.70405 |
| C | 2.53419  | -0.05047 | -1.25329 |
| C | 1.48400  | 0.77567  | -0.83636 |
| C | 1.73666  | 1.77181  | 0.11419  |
| O | 2.24283  | -0.97966 | -2.18306 |
| O | 5.25179  | 1.31218  | 0.88629  |
| C | 4.87916  | -0.81766 | -1.19419 |
| C | 0.64247  | 2.73967  | 0.50802  |
| C | -0.73613 | 2.34110  | -0.02799 |
| O | -0.59951 | 1.89547  | -1.39052 |
| C | -1.93182 | -2.21533 | -0.14835 |
| C | -2.75488 | -1.56992 | -1.10894 |
| C | -4.05845 | -1.99552 | -1.38627 |
| C | -4.53706 | -3.09669 | -0.68438 |
| C | -3.73512 | -3.75967 | 0.26713  |
| C | -2.44215 | -3.33008 | 0.53933  |
| C | -6.12360 | 0.98385  | 0.84677  |
| C | -5.36167 | 1.97887  | -0.03452 |
| C | -3.91647 | 2.21350  | 0.42572  |
| C | -3.14474 | 3.17645  | -0.48728 |
| C | -1.71868 | 3.51106  | -0.02187 |
| C | 0.12094  | 0.65870  | -1.49116 |
| O | 6.11433  | -0.65462 | -0.63095 |

|   |          |          |          |
|---|----------|----------|----------|
| O | 4.73386  | -1.68947 | -2.05194 |
| C | -0.77048 | -0.47713 | -1.02476 |
| C | -0.67515 | -1.50539 | -0.10844 |
| C | 0.46353  | -1.88676 | 0.78851  |
| C | 0.59288  | -1.05859 | 2.06173  |
| O | 0.02076  | -0.02130 | 2.31812  |
| O | 1.48330  | -1.63752 | 2.90009  |
| C | 1.74224  | -0.91877 | 4.11651  |
| N | -2.01471 | -0.53806 | -1.63848 |
| H | 3.21107  | 2.68138  | 1.41197  |
| H | 3.07370  | -1.47369 | -2.39351 |
| H | 5.91794  | 0.69129  | 0.53968  |
| H | 0.60354  | 2.82132  | 1.60065  |
| H | 0.91281  | 3.73347  | 0.12175  |
| H | -1.11856 | 1.51216  | 0.58000  |
| H | -4.67311 | -1.48793 | -2.12515 |
| H | -5.54503 | -3.45431 | -0.87613 |
| H | -4.13888 | -4.61848 | 0.79645  |
| H | -1.83949 | -3.84842 | 1.28133  |
| H | -7.15821 | 0.85931  | 0.50607  |
| H | -5.64514 | -0.00251 | 0.83114  |
| H | -6.15555 | 1.32264  | 1.88979  |
| H | -5.89599 | 2.93972  | -0.05570 |
| H | -5.35583 | 1.61439  | -1.07243 |
| H | -3.39883 | 1.24677  | 0.47968  |
| H | -3.92476 | 2.61179  | 1.45163  |
| H | -3.70779 | 4.11707  | -0.56741 |
| H | -3.09792 | 2.76445  | -1.50401 |
| H | -1.75000 | 3.91824  | 0.99887  |
| H | -1.30567 | 4.30168  | -0.66337 |
| H | 0.27601  | 0.53004  | -2.56975 |
| H | 6.69922  | -1.31341 | -1.05038 |
| H | 0.36776  | -2.93543 | 1.09319  |
| H | 1.42799  | -1.83007 | 0.27374  |
| H | 2.46149  | -1.52550 | 4.66783  |
| H | 2.16144  | 0.06692  | 3.89637  |
| H | 0.82239  | -0.79385 | 4.69392  |
| H | -2.36811 | 0.20483  | -2.22322 |

Standard orientations of **1ac**

|   |         |          |          |
|---|---------|----------|----------|
| C | 3.00886 | 1.92152  | 0.67584  |
| C | 4.05978 | 1.09329  | 0.29233  |
| C | 3.85076 | 0.07999  | -0.69821 |
| C | 2.54307 | -0.05117 | -1.25339 |
| C | 1.49441 | 0.77717  | -0.84034 |
| C | 1.74061 | 1.77776  | 0.11158  |

|   |          |          |          |
|---|----------|----------|----------|
| O | 2.22276  | -0.97786 | -2.18847 |
| O | 5.25242  | 1.28921  | 0.87831  |
| C | 4.98683  | -0.74361 | -1.07485 |
| C | 0.64287  | 2.74637  | 0.49508  |
| C | -0.73381 | 2.34297  | -0.04104 |
| O | -0.59289 | 1.89086  | -1.40116 |
| C | -1.91583 | -2.21519 | -0.13512 |
| C | -2.73625 | -1.58373 | -1.10711 |
| C | -4.03599 | -2.01867 | -1.38782 |
| C | -4.51329 | -3.11510 | -0.67763 |
| C | -3.71378 | -3.76440 | 0.28526  |
| C | -2.42463 | -3.32550 | 0.56085  |
| C | -6.12119 | 0.97763  | 0.81907  |
| C | -5.35800 | 1.97046  | -0.06360 |
| C | -3.91527 | 2.21072  | 0.40148  |
| C | -3.14220 | 3.17147  | -0.51270 |
| C | -1.71854 | 3.51109  | -0.04352 |
| C | 0.13063  | 0.65595  | -1.49480 |
| O | 4.73710  | -1.68657 | -2.03505 |
| O | 6.12421  | -0.66285 | -0.61222 |
| C | -0.75762 | -0.48021 | -1.02243 |
| C | -0.66283 | -1.49857 | -0.09491 |
| C | 0.47051  | -1.86443 | 0.81528  |
| C | 0.57762  | -1.03052 | 2.08728  |
| O | 0.00100  | 0.00806  | 2.32781  |
| O | 1.45422  | -1.60493 | 2.94207  |
| C | 1.69845  | -0.87812 | 4.15717  |
| N | -1.99770 | -0.55403 | -1.64343 |
| H | 3.20695  | 2.69066  | 1.41548  |
| H | 3.01515  | -1.49117 | -2.43285 |
| H | 5.88925  | 0.63673  | 0.49980  |
| H | 0.60151  | 2.83666  | 1.58683  |
| H | 0.91268  | 3.73736  | 0.10141  |
| H | -1.11648 | 1.51658  | 0.57012  |
| H | -4.64893 | -1.52143 | -2.13511 |
| H | -5.51844 | -3.47948 | -0.87145 |
| H | -4.11657 | -4.61959 | 0.82112  |
| H | -1.82409 | -3.83279 | 1.31215  |
| H | -7.15402 | 0.84883  | 0.47456  |
| H | -5.64016 | -0.00758 | 0.81024  |
| H | -6.15846 | 1.32122  | 1.86032  |
| H | -5.89455 | 2.92989  | -0.09129 |
| H | -5.34706 | 1.60138  | -1.09986 |
| H | -3.39546 | 1.24552  | 0.46202  |
| H | -3.92870 | 2.61354  | 1.42553  |
| H | -3.70697 | 4.11050  | -0.59888 |

|   |          |          |          |
|---|----------|----------|----------|
| H | -3.09076 | 2.75521  | -1.52750 |
| H | -1.75432 | 3.92248  | 0.97535  |
| H | -1.30487 | 4.29985  | -0.68686 |
| H | 0.28443  | 0.52239  | -2.57283 |
| H | 5.57751  | -2.15874 | -2.18586 |
| H | 0.38414  | -2.91331 | 1.12190  |
| H | 1.44035  | -1.79530 | 0.31237  |
| H | 2.41054  | -1.48154 | 4.72109  |
| H | 2.12115  | 0.10561  | 3.93539  |
| H | 0.77134  | -0.74913 | 4.72189  |
| H | -2.35289 | 0.18359  | -2.23383 |

Standard orientations of **1ad**

|   |          |          |          |
|---|----------|----------|----------|
| C | 2.64622  | 2.63267  | 1.08681  |
| C | 3.76704  | 1.86304  | 0.77816  |
| C | 3.69134  | 0.85539  | -0.23419 |
| C | 2.44025  | 0.64781  | -0.88035 |
| C | 1.31392  | 1.39948  | -0.52336 |
| C | 1.43058  | 2.41104  | 0.43946  |
| O | 2.24272  | -0.26014 | -1.85725 |
| O | 4.89825  | 2.11411  | 1.45726  |
| C | 4.89274  | 0.08472  | -0.52063 |
| C | 0.23576  | 3.28744  | 0.75114  |
| C | -1.08029 | 2.69206  | 0.24235  |
| O | -0.89519 | 2.24859  | -1.10982 |
| C | -1.73049 | -2.00518 | 0.04858  |
| C | -2.57087 | -1.47145 | -0.96349 |
| C | -3.80005 | -2.04802 | -1.30146 |
| C | -4.18720 | -3.18661 | -0.60340 |
| C | -3.36744 | -3.73779 | 0.40251  |
| C | -2.14632 | -3.16226 | 0.73216  |
| C | -6.21904 | 0.56331  | 1.07721  |
| C | -5.60681 | 1.66820  | 0.21037  |
| C | -4.20739 | 2.09684  | 0.67242  |
| C | -3.58277 | 3.17332  | -0.22624 |
| C | -2.22168 | 3.70844  | 0.24643  |
| C | -0.00644 | 1.12407  | -1.21263 |
| O | 4.78461  | -0.81727 | -1.53463 |
| O | 5.96998  | 0.19512  | 0.06644  |
| C | -0.74822 | -0.13265 | -0.78379 |
| C | -0.57757 | -1.13708 | 0.15299  |
| C | 0.54011  | -1.33958 | 1.15049  |
| C | 1.48395  | -2.47587 | 0.77275  |
| O | 2.50598  | -2.37044 | 0.12558  |
| O | 1.04456  | -3.65963 | 1.25438  |
| C | 1.83829  | -4.80589 | 0.90599  |

|   |          |          |          |
|---|----------|----------|----------|
| N | -1.93663 | -0.35879 | -1.46549 |
| H | 2.74639  | 3.40306  | 1.84462  |
| H | 2.99545  | -0.87963 | -1.88738 |
| H | 5.58704  | 1.48023  | 1.13950  |
| H | 0.17576  | 3.47287  | 1.83096  |
| H | 0.38976  | 4.26581  | 0.27309  |
| H | -1.34646 | 1.82449  | 0.86513  |
| H | -4.42779 | -1.62315 | -2.08045 |
| H | -5.13585 | -3.66065 | -0.84030 |
| H | -3.69852 | -4.63026 | 0.92676  |
| H | -1.51767 | -3.60264 | 1.49924  |
| H | -7.22753 | 0.30175  | 0.73623  |
| H | -5.60895 | -0.34702 | 1.04415  |
| H | -6.29418 | 0.87801  | 2.12560  |
| H | -6.27020 | 2.54502  | 0.20450  |
| H | -5.55229 | 1.32333  | -0.83255 |
| H | -3.55939 | 1.21076  | 0.70715  |
| H | -4.26814 | 2.47303  | 1.70512  |
| H | -4.27652 | 4.02279  | -0.29630 |
| H | -3.47496 | 2.78415  | -1.24691 |
| H | -2.31476 | 4.10658  | 1.26698  |
| H | -1.92358 | 4.55021  | -0.39311 |
| H | 0.17752  | 1.03547  | -2.28996 |
| H | 5.63392  | -1.29584 | -1.56908 |
| H | 1.14377  | -0.43794 | 1.24985  |
| H | 0.10813  | -1.57191 | 2.13084  |
| H | 1.34104  | -5.65788 | 1.37010  |
| H | 1.87691  | -4.92869 | -0.17953 |
| H | 2.85617  | -4.69807 | 1.28988  |
| H | -2.35165 | 0.33226  | -2.07304 |

Standard orientations of **1ae**

|   |          |          |          |
|---|----------|----------|----------|
| C | 2.64696  | -2.63227 | -1.08649 |
| C | 3.76754  | -1.86234 | -0.77780 |
| C | 3.69153  | -0.85464 | 0.23446  |
| C | 2.44035  | -0.64730 | 0.88049  |
| C | 1.31422  | -1.39929 | 0.52349  |
| C | 1.43120  | -2.41088 | -0.43925 |
| O | 2.24252  | 0.26070  | 1.85730  |
| O | 4.89887  | -2.11319 | -1.45680 |
| C | 4.89269  | -0.08347 | 0.52076  |
| C | 0.23660  | -3.28754 | -0.75107 |
| C | -1.07960 | -2.69233 | -0.24250 |
| O | -0.89474 | -2.24895 | 1.10973  |
| C | -1.73109 | 2.00453  | -0.04839 |
| C | -2.57101 | 1.47099  | 0.96417  |

|   |          |          |          |
|---|----------|----------|----------|
| C | -3.80010 | 2.04754  | 1.30247  |
| C | -4.18765 | 3.18590  | 0.60425  |
| C | -3.36834 | 3.73690  | -0.40212 |
| C | -2.14730 | 3.16141  | -0.73210 |
| C | -6.21807 | -0.56333 | -1.07760 |
| C | -5.60595 | -1.66827 | -0.21073 |
| C | -4.20657 | -2.09704 | -0.67280 |
| C | -3.58208 | -3.17365 | 0.22578  |
| C | -2.22095 | -3.70875 | -0.24683 |
| C | -0.00622 | -1.12427 | 1.21275  |
| O | 4.78424  | 0.81853  | 1.53473  |
| O | 5.96993  | -0.19350 | -0.06633 |
| C | -0.74823 | 0.13239  | 0.78414  |
| C | -0.57811 | 1.13655  | -0.15302 |
| C | 0.53924  | 1.33905  | -1.15092 |
| C | 1.48300  | 2.47551  | -0.77350 |
| O | 2.50520  | 2.37024  | -0.12659 |
| O | 1.04328  | 3.65920  | -1.25509 |
| C | 1.83681  | 4.80561  | -0.90679 |
| N | -1.93643 | 0.35854  | 1.46621  |
| H | 2.74737  | -3.40268 | -1.84426 |
| H | 2.99529  | 0.88012  | 1.88766  |
| H | 5.58737  | -1.47899 | -1.13914 |
| H | 0.17680  | -3.47302 | -1.83089 |
| H | 0.39070  | -4.26587 | -0.27296 |
| H | -1.34570 | -1.82474 | -0.86527 |
| H | -4.42750 | 1.62283  | 2.08182  |
| H | -5.13626 | 3.65991  | 0.84139  |
| H | -3.69974 | 4.62921  | -0.92646 |
| H | -1.51899 | 3.60165  | -1.49955 |
| H | -7.22655 | -0.30170 | -0.73665 |
| H | -5.60792 | 0.34696  | -1.04451 |
| H | -6.29319 | -0.87803 | -2.12599 |
| H | -6.26943 | -2.54502 | -0.20485 |
| H | -5.55138 | -1.32336 | 0.83217  |
| H | -3.55848 | -1.21103 | -0.70744 |
| H | -4.26736 | -2.47314 | -1.70552 |
| H | -4.27587 | -4.02311 | 0.29566  |
| H | -3.47435 | -2.78463 | 1.24651  |
| H | -2.31394 | -4.10677 | -1.26743 |
| H | -1.92290 | -4.55059 | 0.39265  |
| H | 0.17768  | -1.03584 | 2.29011  |
| H | 5.63332  | 1.29750  | 1.56907  |
| H | 1.14304  | 0.43750  | -1.25029 |
| H | 0.10695  | 1.57118  | -2.13118 |
| H | 1.87681  | 4.92757  | 0.17878  |

|   |          |          |          |
|---|----------|----------|----------|
| H | 2.85425  | 4.69870  | -1.29212 |
| H | 1.33850  | 5.65770  | -1.36958 |
| H | -2.35108 | -0.33230 | 2.07423  |

Standard orientations of **1af**

|   |          |          |          |
|---|----------|----------|----------|
| C | 3.54780  | 2.26740  | 0.27717  |
| C | 4.47722  | 1.24354  | 0.43120  |
| C | 4.10918  | -0.10320 | 0.12916  |
| C | 2.77427  | -0.35029 | -0.32209 |
| C | 1.84828  | 0.69368  | -0.46292 |
| C | 2.25104  | 2.00428  | -0.17264 |
| O | 2.34543  | -1.58447 | -0.63316 |
| O | 5.70099  | 1.60847  | 0.87093  |
| C | 5.00607  | -1.24189 | 0.24196  |
| C | 1.28561  | 3.15038  | -0.39010 |
| C | -0.16075 | 2.67363  | -0.55420 |
| O | -0.17719 | 1.58372  | -1.48254 |
| C | -2.11763 | -1.34349 | 1.15530  |
| C | -1.10847 | -1.00069 | 2.09625  |
| C | -1.21619 | -1.31701 | 3.45485  |
| C | -2.36137 | -1.98849 | 3.86704  |
| C | -3.37318 | -2.34189 | 2.94924  |
| C | -3.26246 | -2.02949 | 1.60048  |
| C | -5.47131 | 2.20835  | 1.10526  |
| C | -4.76263 | 2.65009  | -0.17934 |
| C | -3.27453 | 2.96170  | 0.02952  |
| C | -2.55293 | 3.35050  | -1.26822 |
| C | -1.08326 | 3.76604  | -1.09334 |
| C | 0.44339  | 0.39734  | -0.96838 |
| O | 6.26705  | -0.95111 | 0.68166  |
| O | 4.72666  | -2.41190 | -0.01856 |
| C | -0.44309 | -0.27882 | 0.05822  |
| C | -1.67678 | -0.86524 | -0.12891 |
| C | -2.42797 | -0.98111 | -1.43002 |
| C | -2.37740 | -2.40039 | -1.97311 |
| O | -3.21104 | -3.25794 | -1.77551 |
| O | -1.24882 | -2.60610 | -2.69049 |
| C | -1.06512 | -3.94490 | -3.17704 |
| N | -0.11350 | -0.34503 | 1.40268  |
| H | 3.86230  | 3.28033  | 0.50711  |
| H | 3.09546  | -2.21469 | -0.49766 |
| H | 6.27641  | 0.82473  | 0.93703  |
| H | 1.36317  | 3.86796  | 0.43664  |
| H | 1.58742  | 3.68769  | -1.30083 |
| H | -0.53561 | 2.32063  | 0.41820  |
| H | -0.43540 | -1.04848 | 4.16202  |

|   |          |          |          |
|---|----------|----------|----------|
| H | -2.47703 | -2.24974 | 4.91549  |
| H | -4.25015 | -2.87493 | 3.30638  |
| H | -4.02936 | -2.33068 | 0.89260  |
| H | -5.01608 | 1.29824  | 1.51428  |
| H | -5.41153 | 2.98491  | 1.87813  |
| H | -6.53226 | 1.99970  | 0.92534  |
| H | -5.26556 | 3.53572  | -0.59385 |
| H | -4.86165 | 1.86200  | -0.93969 |
| H | -2.79187 | 2.08200  | 0.47562  |
| H | -3.17541 | 3.77566  | 0.76445  |
| H | -3.08866 | 4.18692  | -1.73881 |
| H | -2.60175 | 2.51515  | -1.97716 |
| H | -1.01883 | 4.62690  | -0.41220 |
| H | -0.68420 | 4.09947  | -2.06096 |
| H | 0.51146  | -0.26845 | -1.83414 |
| H | 6.75502  | -1.79580 | 0.70693  |
| H | -3.48437 | -0.73264 | -1.28367 |
| H | -2.01145 | -0.29002 | -2.16711 |
| H | -1.88661 | -4.22959 | -3.84012 |
| H | -0.11989 | -3.93207 | -3.72064 |
| H | -1.02008 | -4.65220 | -2.34454 |
| H | 0.76972  | -0.03895 | 1.78158  |

Standard orientations of **1ag**

|   |          |          |          |
|---|----------|----------|----------|
| C | -2.85464 | -2.61684 | 0.54843  |
| C | -4.13245 | -2.07628 | 0.44288  |
| C | -4.32240 | -0.81972 | -0.20927 |
| C | -3.16825 | -0.15250 | -0.72916 |
| C | -1.88754 | -0.70648 | -0.60060 |
| C | -1.74240 | -1.95176 | 0.02605  |
| O | -3.25574 | 1.03152  | -1.36191 |
| O | -5.13533 | -2.80294 | 0.98188  |
| C | -5.61382 | -0.17789 | -0.39063 |
| C | -0.37911 | -2.60825 | 0.09262  |
| C | 0.76438  | -1.65592 | -0.27508 |
| O | 0.38038  | -0.91663 | -1.44377 |
| C | 0.86278  | 3.02663  | 0.42666  |
| C | -0.22196 | 2.71570  | 1.29137  |
| C | -0.51772 | 3.47886  | 2.42580  |
| C | 0.29458  | 4.57512  | 2.69115  |
| C | 1.37633  | 4.90315  | 1.84745  |
| C | 1.66832  | 4.14175  | 0.72302  |
| C | 6.05559  | -5.11911 | 1.03652  |
| C | 4.68379  | -4.52966 | 1.38040  |
| C | 4.05894  | -3.73839 | 0.22440  |
| C | 2.68577  | -3.14232 | 0.56175  |

|   |          |          |          |
|---|----------|----------|----------|
| C | 2.07915  | -2.35587 | -0.60838 |
| C | -0.68127 | 0.00499  | -1.19837 |
| O | -6.68132 | -0.85509 | 0.12878  |
| O | -5.81518 | 0.89633  | -0.95717 |
| C | -0.20032 | 1.19384  | -0.38135 |
| C | 0.85761  | 2.04474  | -0.62743 |
| C | 1.82613  | 1.96911  | -1.77802 |
| C | 3.25757  | 1.74088  | -1.30808 |
| O | 3.67917  | 0.73289  | -0.78292 |
| O | 4.03344  | 2.82713  | -1.54152 |
| C | 5.39973  | 2.70881  | -1.11113 |
| N | -0.83629 | 1.59373  | 0.78177  |
| H | -2.74767 | -3.57907 | 1.03892  |
| H | -4.20900 | 1.29325  | -1.39463 |
| H | -5.98519 | -2.34569 | 0.84675  |
| H | -0.22300 | -3.03296 | 1.09165  |
| H | -0.37478 | -3.45489 | -0.60972 |
| H | 0.93599  | -0.94707 | 0.54963  |
| H | -1.35198 | 3.22579  | 3.07524  |
| H | 0.09184  | 5.19020  | 3.56375  |
| H | 1.99036  | 5.76794  | 2.08456  |
| H | 2.50510  | 4.40044  | 0.08037  |
| H | 6.76960  | -4.33019 | 0.76980  |
| H | 6.47591  | -5.67709 | 1.88122  |
| H | 5.98946  | -5.80586 | 0.18348  |
| H | 4.00164  | -5.33959 | 1.67689  |
| H | 4.77686  | -3.87449 | 2.25826  |
| H | 3.96494  | -4.39406 | -0.65434 |
| H | 4.73923  | -2.92733 | -0.07226 |
| H | 2.78700  | -2.47789 | 1.43254  |
| H | 2.01068  | -3.95396 | 0.87003  |
| H | 1.91225  | -3.02341 | -1.46595 |
| H | 2.78004  | -1.57858 | -0.93019 |
| H | -0.95768 | 0.36932  | -2.19407 |
| H | -7.47291 | -0.31887 | -0.06636 |
| H | 1.56984  | 1.11968  | -2.41714 |
| H | 1.79701  | 2.88391  | -2.38001 |
| H | 5.44823  | 2.54366  | -0.03158 |
| H | 5.87328  | 3.65438  | -1.37717 |
| H | 5.89130  | 1.87549  | -1.62011 |
| H | -1.67038 | 1.15952  | 1.14537  |

Standard orientations of **1ah**

|   |          |          |          |
|---|----------|----------|----------|
| C | -2.90597 | -2.06407 | 0.62033  |
| C | -4.00283 | -1.29711 | 0.23817  |
| C | -3.84720 | -0.25493 | -0.73208 |

|   |          |          |          |
|---|----------|----------|----------|
| C | -2.54411 | -0.03109 | -1.26829 |
| C | -1.44956 | -0.79832 | -0.85586 |
| C | -1.64301 | -1.83021 | 0.07475  |
| O | -2.27283 | 0.92956  | -2.18423 |
| O | -5.18727 | -1.57858 | 0.80569  |
| C | -5.02900 | 0.50133  | -1.10928 |
| C | -0.49017 | -2.73443 | 0.45419  |
| C | 0.86376  | -2.22457 | -0.04648 |
| O | 0.71536  | -1.76170 | -1.40237 |
| C | 1.74403  | 2.41040  | -0.07906 |
| C | 2.60618  | 1.85933  | -1.06379 |
| C | 3.86728  | 2.39710  | -1.34171 |
| C | 4.26228  | 3.51504  | -0.61559 |
| C | 3.42061  | 4.08484  | 0.36148  |
| C | 2.17015  | 3.54408  | 0.63455  |
| C | 6.47712  | -2.55328 | 0.10738  |
| C | 5.41990  | -1.44571 | 0.19250  |
| C | 4.01459  | -1.92752 | 0.59175  |
| C | 3.34504  | -2.85081 | -0.43729 |
| C | 1.93162  | -3.31689 | -0.05039 |
| C | -0.08892 | -0.57774 | -1.49080 |
| O | -4.82879 | 1.47482  | -2.05040 |
| O | -6.16421 | 0.34051  | -0.66243 |
| C | 0.71483  | 0.61064  | -0.99641 |
| C | 0.54767  | 1.60206  | -0.05003 |
| C | -0.60712 | 1.86791  | 0.86807  |
| C | -0.63599 | 1.02276  | 2.13673  |
| O | -0.00385 | 0.01110  | 2.35172  |
| O | -1.51517 | 1.54673  | 3.02076  |
| C | -1.68885 | 0.79979  | 4.23577  |
| N | 1.94508  | 0.78653  | -1.61625 |
| H | -3.06326 | -2.85725 | 1.34418  |
| H | -3.09315 | 1.39656  | -2.42919 |
| H | -5.85987 | -0.96110 | 0.43041  |
| H | -0.46089 | -2.85096 | 1.54388  |
| H | -0.68570 | -3.73041 | 0.03021  |
| H | 1.17207  | -1.38265 | 0.58477  |
| H | 4.51341  | 1.95968  | -2.09845 |
| H | 5.23596  | 3.95815  | -0.80625 |
| H | 3.75947  | 4.95938  | 0.91027  |
| H | 1.53613  | 3.99150  | 1.39636  |
| H | 6.24099  | -3.28902 | -0.66973 |
| H | 7.46470  | -2.13780 | -0.12449 |
| H | 6.55947  | -3.09253 | 1.05969  |
| H | 5.75001  | -0.69379 | 0.92122  |
| H | 5.36051  | -0.92140 | -0.77251 |

|   |          |          |          |
|---|----------|----------|----------|
| H | 3.38389  | -1.04580 | 0.76069  |
| H | 4.07414  | -2.44949 | 1.55908  |
| H | 3.96593  | -3.74325 | -0.58741 |
| H | 3.29730  | -2.34538 | -1.41132 |
| H | 1.95529  | -3.77183 | 0.95017  |
| H | 1.60420  | -4.10233 | -0.74528 |
| H | -0.23885 | -0.44156 | -2.56912 |
| H | -5.69577 | 1.89526  | -2.20385 |
| H | -0.60976 | 2.91944  | 1.17700  |
| H | -1.57037 | 1.71484  | 0.37085  |
| H | -2.41438 | 1.36250  | 4.82410  |
| H | -0.74105 | 0.71386  | 4.77370  |
| H | -2.06726 | -0.20264 | 4.01775  |
| H | 2.35125  | 0.09101  | -2.22448 |

Standard orientations of **1ai**

|   |          |          |          |
|---|----------|----------|----------|
| C | 3.41943  | -2.36704 | -0.94170 |
| C | 4.56112  | -1.70814 | -0.49176 |
| C | 4.44485  | -0.60965 | 0.41974  |
| C | 3.13697  | -0.21803 | 0.83408  |
| C | 1.99941  | -0.88677 | 0.36314  |
| C | 2.15127  | -1.97116 | -0.51539 |
| O | 2.90076  | 0.80015  | 1.69168  |
| O | 5.74757  | -2.14380 | -0.94386 |
| C | 5.67063  | 0.03342  | 0.86556  |
| C | 0.93134  | -2.74847 | -0.96405 |
| C | -0.38531 | -2.02164 | -0.66745 |
| O | -0.33536 | -1.50866 | 0.66851  |
| C | -0.93105 | 2.73333  | -0.43173 |
| C | 0.15119  | 2.52416  | -1.32885 |
| C | 0.44113  | 3.40850  | -2.37358 |
| C | -0.37659 | 4.52314  | -2.51526 |
| C | -1.46003 | 4.74914  | -1.64049 |
| C | -1.74541 | 3.86615  | -0.60770 |
| C | -6.70443 | -3.32780 | -0.71515 |
| C | -5.48094 | -2.48646 | -0.33757 |
| C | -4.15133 | -3.12709 | -0.75675 |
| C | -2.93135 | -2.25129 | -0.44575 |
| C | -1.60157 | -2.93767 | -0.78120 |
| C | 0.61638  | -0.45074 | 0.82837  |
| O | 5.50404  | 1.06986  | 1.74210  |
| O | 6.81200  | -0.27308 | 0.52427  |
| C | 0.14483  | 0.83299  | 0.17252  |
| C | -0.91598 | 1.64572  | 0.51200  |
| C | -1.84415 | 1.45640  | 1.67090  |
| C | -3.30729 | 1.25151  | 1.29304  |

|   |          |          |          |
|---|----------|----------|----------|
| O | -3.75867 | 1.11770  | 0.17801  |
| O | -4.07146 | 1.24030  | 2.41248  |
| C | -5.47754 | 1.04549  | 2.19629  |
| N | 0.77259  | 1.35526  | -0.94792 |
| H | 3.54553  | -3.20198 | -1.62340 |
| H | 3.74361  | 1.20196  | 1.97318  |
| H | 6.45388  | -1.58729 | -0.53613 |
| H | 1.00833  | -2.98183 | -2.03360 |
| H | 0.92908  | -3.71203 | -0.43434 |
| H | -0.50781 | -1.17919 | -1.36620 |
| H | 1.27356  | 3.23075  | -3.04985 |
| H | -0.17989 | 5.23090  | -3.31604 |
| H | -2.08386 | 5.62719  | -1.78443 |
| H | -2.59231 | 4.04489  | 0.04904  |
| H | -6.66366 | -4.32049 | -0.24939 |
| H | -7.63662 | -2.84811 | -0.39467 |
| H | -6.76336 | -3.47543 | -1.80065 |
| H | -5.55999 | -1.48933 | -0.79157 |
| H | -5.47099 | -2.32447 | 0.75040  |
| H | -4.17897 | -3.34345 | -1.83567 |
| H | -4.04604 | -4.10186 | -0.25602 |
| H | -2.93010 | -1.98280 | 0.61737  |
| H | -3.01117 | -1.30294 | -0.99295 |
| H | -1.62867 | -3.32694 | -1.80953 |
| H | -1.45432 | -3.80543 | -0.12251 |
| H | 0.64836  | -0.28394 | 1.90965  |
| H | 6.39631  | 1.40407  | 1.95267  |
| H | -1.55076 | 0.58665  | 2.27015  |
| H | -1.81025 | 2.31443  | 2.35679  |
| H | -5.88259 | 1.83596  | 1.55847  |
| H | -5.93387 | 1.08078  | 3.18633  |
| H | -5.66448 | 0.07833  | 1.72190  |
| H | 1.61816  | 0.97696  | -1.34659 |

Standard orientations of **1aj**

|   |          |          |          |
|---|----------|----------|----------|
| C | -3.23820 | -1.83391 | 0.86078  |
| C | -4.24945 | -0.93458 | 0.53438  |
| C | -4.02750 | 0.06393  | -0.46880 |
| C | -2.74805 | 0.10679  | -1.09807 |
| C | -1.73740 | -0.79367 | -0.74078 |
| C | -1.99663 | -1.77647 | 0.22631  |
| O | -2.42173 | 0.99888  | -2.06173 |
| O | -5.41757 | -1.04838 | 1.18738  |
| C | -5.12300 | 0.96612  | -0.78098 |
| C | -0.93773 | -2.80629 | 0.55751  |
| C | 0.44144  | -2.44244 | 0.00210  |

|   |          |          |          |
|---|----------|----------|----------|
| O | 0.29290  | -1.99175 | -1.35636 |
| C | 1.77996  | 2.10789  | -0.27145 |
| C | 2.36823  | 1.65645  | -1.48218 |
| C | 3.53225  | 2.22948  | -2.00653 |
| C | 4.10775  | 3.27675  | -1.29502 |
| C | 3.53868  | 3.74321  | -0.09231 |
| C | 2.38345  | 3.16979  | 0.42511  |
| C | 5.33832  | -1.48246 | -1.17208 |
| C | 5.10442  | -2.25393 | 0.13256  |
| C | 3.62470  | -2.43744 | 0.51048  |
| C | 2.82866  | -3.30947 | -0.47262 |
| C | 1.39666  | -3.63417 | -0.01769 |
| C | -0.40090 | -0.74334 | -1.45799 |
| O | -4.86316 | 1.89149  | -1.75533 |
| O | -6.23465 | 0.96451  | -0.25342 |
| C | 0.52089  | 0.40069  | -1.08126 |
| C | 0.60876  | 1.29779  | -0.03397 |
| C | -0.28889 | 1.46881  | 1.16359  |
| C | 0.34984  | 0.92846  | 2.43653  |
| O | 0.58124  | -0.24129 | 2.66261  |
| O | 0.63988  | 1.91970  | 3.30864  |
| C | 1.26554  | 1.49943  | 4.53348  |
| N | 1.57508  | 0.63668  | -1.95490 |
| H | -3.44482 | -2.58426 | 1.61702  |
| H | -3.18308 | 1.57834  | -2.24988 |
| H | -6.02784 | -0.35188 | 0.84571  |
| H | -0.87700 | -2.93409 | 1.64482  |
| H | -1.25635 | -3.77225 | 0.13865  |
| H | 0.85737  | -1.62915 | 0.60875  |
| H | 3.96868  | 1.87308  | -2.93594 |
| H | 5.01252  | 3.74397  | -1.67429 |
| H | 4.01590  | 4.56297  | 0.43788  |
| H | 1.95989  | 3.52576  | 1.36033  |
| H | 4.87642  | -0.48827 | -1.13022 |
| H | 6.40957  | -1.34388 | -1.35982 |
| H | 4.92044  | -2.01048 | -2.03717 |
| H | 5.58423  | -3.24129 | 0.06350  |
| H | 5.61176  | -1.72633 | 0.95150  |
| H | 3.15416  | -1.44944 | 0.60489  |
| H | 3.57185  | -2.89463 | 1.50937  |
| H | 3.36677  | -4.25729 | -0.61818 |
| H | 2.77972  | -2.82764 | -1.45596 |
| H | 1.41829  | -4.06906 | 0.99170  |
| H | 0.96708  | -4.39701 | -0.68158 |
| H | -0.60302 | -0.64153 | -2.53173 |
| H | -5.67507 | 2.42296  | -1.85685 |

|   |          |         |          |
|---|----------|---------|----------|
| H | -0.53037 | 2.52644 | 1.31103  |
| H | -1.22406 | 0.92273 | 1.02848  |
| H | 1.42631  | 2.41224 | 5.10769  |
| H | 2.21633  | 1.00192 | 4.32555  |
| H | 0.61516  | 0.81066 | 5.07892  |
| H | 1.79756  | 0.03098 | -2.73074 |

Standard orientations of **1ak**

|   |          |          |          |
|---|----------|----------|----------|
| C | 2.59362  | 2.70137  | 0.94638  |
| C | 3.72823  | 1.93333  | 0.69665  |
| C | 3.65894  | 0.83688  | -0.21233 |
| C | 2.40078  | 0.54794  | -0.81839 |
| C | 1.26037  | 1.30651  | -0.52682 |
| C | 1.37255  | 2.40144  | 0.33799  |
| O | 2.24493  | -0.47033 | -1.68408 |
| O | 4.85401  | 2.30198  | 1.34622  |
| C | 4.77864  | -0.03248 | -0.53837 |
| C | 0.17224  | 3.29236  | 0.57944  |
| C | -1.13807 | 2.66034  | 0.10018  |
| O | -0.93504 | 2.11168  | -1.21004 |
| C | -1.75235 | -2.06675 | 0.25968  |
| C | -2.61792 | -1.59433 | -0.76110 |
| C | -3.84613 | -2.20256 | -1.04335 |
| C | -4.20109 | -3.31252 | -0.28428 |
| C | -3.35094 | -3.80769 | 0.72596  |
| C | -2.13250 | -3.19910 | 1.00011  |
| C | -6.29030 | 0.61353  | 1.04120  |
| C | -5.66878 | 1.65044  | 0.10015  |
| C | -4.27121 | 2.10795  | 0.53975  |
| C | -3.63401 | 3.10907  | -0.43397 |
| C | -2.27619 | 3.67643  | 0.00958  |
| C | -0.05322 | 0.97642  | -1.20592 |
| O | 5.93979  | 0.23894  | 0.12685  |
| O | 4.76391  | -0.95778 | -1.34918 |
| C | -0.80391 | -0.23567 | -0.68396 |
| C | -0.60910 | -1.18508 | 0.30172  |
| C | 0.52538  | -1.32562 | 1.28095  |
| C | 1.64885  | -2.28170 | 0.89277  |
| O | 2.82674  | -2.07741 | 1.10546  |
| O | 1.18488  | -3.41427 | 0.33091  |
| C | 2.18854  | -4.36613 | -0.05558 |
| N | -2.00316 | -0.50414 | -1.33281 |
| H | 2.68622  | 3.54159  | 1.62709  |
| H | 3.12512  | -0.91240 | -1.78872 |
| H | 5.57436  | 1.68134  | 1.13204  |
| H | 0.10203  | 3.54867  | 1.64420  |

|   |          |          |          |
|---|----------|----------|----------|
| H | 0.32906  | 4.23770  | 0.03986  |
| H | -1.41469 | 1.84445  | 0.78507  |
| H | -4.49602 | -1.82593 | -1.82901 |
| H | -5.14735 | -3.81034 | -0.47814 |
| H | -3.65491 | -4.68275 | 1.29404  |
| H | -1.47780 | -3.60069 | 1.76861  |
| H | -7.29726 | 0.33030  | 0.71331  |
| H | -5.68264 | -0.29828 | 1.07907  |
| H | -6.37143 | 1.00424  | 2.06323  |
| H | -6.32929 | 2.52625  | 0.02520  |
| H | -5.60829 | 1.23007  | -0.91441 |
| H | -3.62764 | 1.22472  | 0.64832  |
| H | -4.33888 | 2.56306  | 1.53973  |
| H | -4.32416 | 3.95216  | -0.57790 |
| H | -3.51707 | 2.64101  | -1.41997 |
| H | -2.37934 | 4.15532  | 0.99386  |
| H | -1.96797 | 4.46351  | -0.69186 |
| H | 0.14833  | 0.79800  | -2.26950 |
| H | 6.59073  | -0.42428 | -0.17001 |
| H | 1.00105  | -0.37063 | 1.50421  |
| H | 0.12197  | -1.70224 | 2.23249  |
| H | 1.64674  | -5.18472 | -0.52998 |
| H | 2.89514  | -3.91260 | -0.75553 |
| H | 2.73769  | -4.72390 | 0.82000  |
| H | -2.42987 | 0.14658  | -1.97546 |

Standard orientations of **1al**

|   |          |          |          |
|---|----------|----------|----------|
| C | 3.62827  | -1.96670 | -1.03420 |
| C | 4.64930  | -1.09310 | -0.67380 |
| C | 4.38000  | -0.01506 | 0.22392  |
| C | 3.04603  | 0.12994  | 0.71893  |
| C | 2.02639  | -0.75337 | 0.33485  |
| C | 2.33311  | -1.81120 | -0.53195 |
| O | 2.70690  | 1.10793  | 1.57489  |
| O | 5.86224  | -1.33452 | -1.21693 |
| C | 5.37618  | 0.94260  | 0.67580  |
| C | 1.25929  | -2.81454 | -0.89692 |
| C | -0.14593 | -2.29590 | -0.58091 |
| O | -0.14641 | -1.77646 | 0.75318  |
| C | -1.55424 | 2.31469  | -0.09581 |
| C | -0.63051 | 2.22202  | -1.17216 |
| C | -0.66691 | 3.09096  | -2.26829 |
| C | -1.65599 | 4.06698  | -2.27858 |
| C | -2.59144 | 4.16960  | -1.22736 |
| C | -2.55384 | 3.30321  | -0.14309 |
| C | -5.18448 | -0.78140 | -2.62730 |

|   |          |          |          |
|---|----------|----------|----------|
| C | -4.64295 | -1.57793 | -1.43569 |
| C | -3.18955 | -2.03187 | -1.62783 |
| C | -2.65478 | -2.87529 | -0.46110 |
| C | -1.21582 | -3.38441 | -0.64819 |
| C | 0.62357  | -0.57632 | 0.90010  |
| O | 6.63216  | 0.76306  | 0.16767  |
| O | 5.18239  | 1.87485  | 1.45567  |
| C | -0.11100 | 0.62002  | 0.33776  |
| C | -1.19981 | 1.29136  | 0.85421  |
| C | -1.84562 | 1.03333  | 2.18726  |
| C | -3.23714 | 0.41961  | 2.10110  |
| O | -4.15125 | 0.84311  | 1.42577  |
| O | -3.34950 | -0.65279 | 2.91669  |
| C | -4.64958 | -1.26507 | 2.96016  |
| N | 0.21583  | 1.17021  | -0.89263 |
| H | 3.86849  | -2.78046 | -1.71088 |
| H | 3.51457  | 1.64731  | 1.76232  |
| H | 6.50498  | -0.67520 | -0.89774 |
| H | 1.34282  | -3.08469 | -1.95728 |
| H | 1.43400  | -3.73590 | -0.32256 |
| H | -0.39646 | -1.48711 | -1.28342 |
| H | 0.04968  | 3.00561  | -3.08137 |
| H | -1.71364 | 4.75881  | -3.11467 |
| H | -3.36037 | 4.93598  | -1.27512 |
| H | -3.29836 | 3.36425  | 0.64416  |
| H | -5.15564 | -1.37453 | -3.55041 |
| H | -6.22288 | -0.47253 | -2.46130 |
| H | -4.59213 | 0.12605  | -2.79475 |
| H | -4.71070 | -0.96025 | -0.53077 |
| H | -5.27833 | -2.45988 | -1.26502 |
| H | -2.56226 | -1.14088 | -1.76788 |
| H | -3.11061 | -2.61396 | -2.55946 |
| H | -3.31247 | -3.74517 | -0.32378 |
| H | -2.70250 | -2.29839 | 0.47078  |
| H | -1.12546 | -3.89827 | -1.61610 |
| H | -0.98277 | -4.12635 | 0.12735  |
| H | 0.69984  | -0.43980 | 1.98341  |
| H | 7.19086  | 1.46495  | 0.55167  |
| H | -1.22032 | 0.39119  | 2.81146  |
| H | -1.96962 | 1.98450  | 2.72570  |
| H | -5.41343 | -0.52732 | 3.21897  |
| H | -4.58218 | -2.03734 | 3.72715  |
| H | -4.89580 | -1.70948 | 1.99243  |
| H | 1.04228  | 0.92310  | -1.41558 |

Standard orientations of **1am**

|   |          |          |          |
|---|----------|----------|----------|
| C | 2.38712  | -2.86594 | -0.88288 |
| C | 3.57668  | -2.18893 | -0.62570 |
| C | 3.58220  | -1.07335 | 0.26241  |
| C | 2.34195  | -0.67172 | 0.84061  |
| C | 1.14789  | -1.33905 | 0.54107  |
| C | 1.18448  | -2.45516 | -0.30321 |
| O | 2.25606  | 0.37147  | 1.68633  |
| O | 4.67912  | -2.66056 | -1.24798 |
| C | 4.76253  | -0.28920 | 0.58977  |
| C | -0.08218 | -3.24544 | -0.55576 |
| C | -1.34123 | -2.48907 | -0.12286 |
| O | -1.12306 | -1.94314 | 1.18597  |
| C | -1.53713 | 2.28622  | -0.31258 |
| C | -2.44502 | 1.91442  | 0.71308  |
| C | -3.60311 | 2.64859  | 0.99138  |
| C | -3.84299 | 3.78240  | 0.22340  |
| C | -2.94933 | 4.17776  | -0.79321 |
| C | -1.80091 | 3.44421  | -1.06380 |
| C | -6.93785 | -1.94324 | -0.28425 |
| C | -5.72554 | -1.00991 | -0.38739 |
| C | -4.40528 | -1.70925 | -0.75450 |
| C | -3.88761 | -2.68482 | 0.31312  |
| C | -2.57153 | -3.39253 | -0.04947 |
| C | -0.14487 | -0.89014 | 1.19224  |
| O | 5.90856  | -0.66705 | -0.04866 |
| O | 4.80913  | 0.65264  | 1.38062  |
| C | -0.77552 | 0.38076  | 0.65271  |
| C | -0.48770 | 1.29445  | -0.34391 |
| C | 0.65559  | 1.30932  | -1.32233 |
| C | 1.87156  | 2.15025  | -0.94599 |
| O | 3.02009  | 1.83413  | -1.18200 |
| O | 1.53010  | 3.31668  | -0.36667 |
| C | 2.62918  | 4.16059  | 0.01120  |
| N | -1.94298 | 0.77361  | 1.29593  |
| H | 2.42165  | -3.72298 | -1.54785 |
| H | 3.16803  | 0.74036  | 1.80137  |
| H | 5.44389  | -2.09581 | -1.03322 |
| H | -0.14950 | -3.51903 | -1.61640 |
| H | -0.02220 | -4.18792 | 0.00778  |
| H | -1.52084 | -1.66100 | -0.82517 |
| H | -4.28725 | 2.34729  | 1.78052  |
| H | -4.73267 | 4.37669  | 0.41359  |
| H | -3.16288 | 5.07432  | -1.36896 |
| H | -1.11026 | 3.76899  | -1.83723 |
| H | -7.85318 | -1.37676 | -0.07760 |
| H | -7.09252 | -2.49278 | -1.22155 |

|   |          |          |          |
|---|----------|----------|----------|
| H | -6.82254 | -2.68177 | 0.51711  |
| H | -5.59542 | -0.47116 | 0.56237  |
| H | -5.93251 | -0.23971 | -1.14185 |
| H | -3.64981 | -0.93572 | -0.94260 |
| H | -4.53592 | -2.24924 | -1.70501 |
| H | -4.64361 | -3.45794 | 0.49988  |
| H | -3.75311 | -2.15245 | 1.26393  |
| H | -2.67953 | -3.89887 | -1.01938 |
| H | -2.36502 | -4.17580 | 0.69232  |
| H | 0.05230  | -0.72302 | 2.25862  |
| H | 6.60555  | -0.05066 | 0.24461  |
| H | 1.03259  | 0.30867  | -1.53445 |
| H | 0.29323  | 1.71318  | -2.27928 |
| H | 3.19177  | 4.47855  | -0.87124 |
| H | 2.17930  | 5.01958  | 0.50963  |
| H | 3.30312  | 3.62873  | 0.68786  |
| H | -2.42994 | 0.18022  | 1.95098  |

Standard orientations of **1an**

|   |          |          |          |
|---|----------|----------|----------|
| C | -3.33270 | -2.53127 | 0.77903  |
| C | -4.47063 | -1.81163 | 0.42373  |
| C | -4.35194 | -0.62964 | -0.37619 |
| C | -3.04639 | -0.21984 | -0.77817 |
| C | -1.91049 | -0.94988 | -0.40029 |
| C | -2.06625 | -2.11512 | 0.36554  |
| O | -2.80974 | 0.87142  | -1.53866 |
| O | -5.65560 | -2.27024 | 0.85683  |
| C | -5.57445 | 0.07599  | -0.72747 |
| C | -0.85221 | -2.95174 | 0.70693  |
| C | 0.46614  | -2.19661 | 0.50819  |
| O | 0.43332  | -1.53546 | -0.75980 |
| C | 0.83933  | 2.75041  | 0.50130  |
| C | 0.00254  | 2.28694  | 1.55289  |
| C | -0.18079 | 3.00775  | 2.73770  |
| C | 0.49076  | 4.21834  | 2.86145  |
| C | 1.32636  | 4.69809  | 1.83141  |
| C | 1.50863  | 3.97931  | 0.65684  |
| C | 6.74402  | -3.72775 | 0.35064  |
| C | 5.58054  | -2.73061 | 0.34978  |
| C | 4.20471  | -3.40496 | 0.41607  |
| C | 3.02980  | -2.41858 | 0.45482  |
| C | 1.67332  | -3.13139 | 0.50831  |
| C | -0.53126 | -0.47961 | -0.84634 |
| O | -5.40639 | 1.19205  | -1.49917 |
| O | -6.71387 | -0.24407 | -0.39232 |
| C | -0.08065 | 0.77468  | -0.12901 |

|   |          |          |          |
|---|----------|----------|----------|
| C | 0.77430  | 1.76907  | -0.55343 |
| C | 1.47150  | 1.84443  | -1.88681 |
| C | 2.96831  | 2.09442  | -1.76433 |
| O | 3.51910  | 3.14490  | -2.02061 |
| O | 3.62636  | 1.00360  | -1.31865 |
| C | 5.03895  | 1.18336  | -1.12335 |
| N | -0.52509 | 1.07898  | 1.15077  |
| H | -3.45965 | -3.42868 | 1.37591  |
| H | -3.64970 | 1.31816  | -1.75344 |
| H | -6.35930 | -1.66340 | 0.52297  |
| H | -0.92993 | -3.32414 | 1.73621  |
| H | -0.85057 | -3.83652 | 0.05392  |
| H | 0.58569  | -1.44585 | 1.30591  |
| H | -0.82511 | 2.63681  | 3.53087  |
| H | 0.36928  | 4.80497  | 3.76812  |
| H | 1.83655  | 5.64864  | 1.96197  |
| H | 2.15714  | 4.35515  | -0.12869 |
| H | 6.68119  | -4.41074 | -0.50550 |
| H | 7.71175  | -3.21583 | 0.29768  |
| H | 6.74031  | -4.33920 | 1.26142  |
| H | 5.68839  | -2.04119 | 1.19947  |
| H | 5.63267  | -2.11130 | -0.55704 |
| H | 4.16541  | -4.05383 | 1.30446  |
| H | 4.09061  | -4.07330 | -0.45058 |
| H | 3.05657  | -1.75871 | -0.42055 |
| H | 3.13152  | -1.76496 | 1.33374  |
| H | 1.61945  | -3.75913 | 1.40961  |
| H | 1.57489  | -3.80844 | -0.35190 |
| H | -0.57139 | -0.24683 | -1.91437 |
| H | -6.29586 | 1.56252  | -1.65345 |
| H | 1.32465  | 0.91006  | -2.43754 |
| H | 1.07604  | 2.66814  | -2.49163 |
| H | 5.52968  | 1.42869  | -2.06922 |
| H | 5.40376  | 0.23244  | -0.73584 |
| H | 5.22620  | 1.98842  | -0.40802 |
| H | -1.25862 | 0.57278  | 1.62347  |

Standard orientations of **1ba**

|   |          |          |          |
|---|----------|----------|----------|
| C | -3.14353 | -2.69762 | 0.78348  |
| C | -4.21296 | -1.97478 | 0.26291  |
| C | -3.96738 | -0.78332 | -0.49011 |
| C | -2.61522 | -0.35790 | -0.65616 |
| C | -1.55371 | -1.05308 | -0.05860 |
| C | -1.83253 | -2.25123 | 0.62070  |
| O | -2.27176 | 0.71397  | -1.40348 |
| O | -5.44904 | -2.45256 | 0.47627  |

|   |          |          |          |
|---|----------|----------|----------|
| C | -5.11830 | -0.08924 | -1.04668 |
| C | -0.68692 | -3.09922 | 1.12873  |
| C | 0.59223  | -2.77480 | 0.35824  |
| O | 0.82083  | -1.36906 | 0.47654  |
| C | 0.56745  | 3.00597  | 0.82359  |
| C | 0.33125  | 2.32232  | 2.04664  |
| C | 0.41462  | 2.96356  | 3.28671  |
| C | 0.73598  | 4.31664  | 3.28839  |
| C | 0.97112  | 5.01437  | 2.08572  |
| C | 0.89132  | 4.37356  | 0.85531  |
| C | 6.12035  | -2.27093 | -0.27649 |
| C | 5.61780  | -3.71744 | -0.19630 |
| C | 4.34329  | -3.90262 | 0.64411  |
| C | 3.09686  | -3.21749 | 0.06764  |
| C | 1.83261  | -3.48519 | 0.89399  |
| C | -0.11811 | -0.53493 | -0.21540 |
| O | -4.83509 | 1.03510  | -1.77181 |
| O | -6.29479 | -0.42488 | -0.91754 |
| C | 0.10352  | 0.84053  | 0.35672  |
| C | 0.41178  | 2.04209  | -0.23821 |
| C | 0.54283  | 2.33478  | -1.70938 |
| C | 1.99282  | 2.56318  | -2.10670 |
| O | 2.53037  | 3.64498  | -2.21014 |
| O | 2.63385  | 1.38916  | -2.30840 |
| C | 4.03345  | 1.49890  | -2.61082 |
| N | 0.02394  | 1.01582  | 1.72929  |
| H | -3.35702 | -3.62334 | 1.30792  |
| H | -3.07176 | 1.15494  | -1.74542 |
| H | -6.09105 | -1.84657 | 0.03402  |
| H | -0.94601 | -4.16103 | 1.03708  |
| H | -0.50824 | -2.90663 | 2.19654  |
| H | 0.45204  | -3.03362 | -0.70540 |
| H | 0.23402  | 2.42634  | 4.21432  |
| H | 0.80938  | 4.84494  | 4.23527  |
| H | 1.22615  | 6.06994  | 2.12570  |
| H | 1.10203  | 4.90819  | -0.06659 |
| H | 6.31371  | -1.86451 | 0.72419  |
| H | 7.05490  | -2.21018 | -0.84596 |
| H | 5.39328  | -1.61202 | -0.76452 |
| H | 6.41170  | -4.34658 | 0.22826  |
| H | 5.43866  | -4.09952 | -1.21173 |
| H | 4.52498  | -3.52740 | 1.66248  |
| H | 4.14290  | -4.97896 | 0.74835  |
| H | 2.93562  | -3.56849 | -0.96309 |
| H | 3.24774  | -2.13429 | 0.00674  |
| H | 1.99138  | -3.16302 | 1.93273  |

|   |          |          |          |
|---|----------|----------|----------|
| H | 1.62568  | -4.56428 | 0.92636  |
| H | 0.14056  | -0.50802 | -1.28418 |
| H | -5.69011 | 1.39726  | -2.07172 |
| H | 0.12757  | 1.51525  | -2.30030 |
| H | -0.00407 | 3.24850  | -1.96492 |
| H | 4.39137  | 0.47440  | -2.72034 |
| H | 4.18525  | 2.05947  | -3.53744 |
| H | 4.56258  | 2.00603  | -1.79964 |
| H | 0.01051  | 0.24219  | 2.37647  |

Standard orientations of **1bb**

|   |          |          |          |
|---|----------|----------|----------|
| C | -1.54285 | -3.15786 | 0.31728  |
| C | -2.77271 | -2.78891 | -0.22084 |
| C | -2.87000 | -1.62907 | -1.05151 |
| C | -1.69164 | -0.85944 | -1.27269 |
| C | -0.47771 | -1.19974 | -0.65944 |
| C | -0.40704 | -2.37716 | 0.10049  |
| O | -1.65316 | 0.21164  | -2.09314 |
| O | -3.83207 | -3.56768 | 0.05591  |
| C | -4.17707 | -1.29182 | -1.59150 |
| C | 0.92433  | -2.81558 | 0.67083  |
| C | 2.08176  | -2.14350 | -0.06757 |
| O | 1.85189  | -0.73161 | -0.05929 |
| C | 0.08667  | 3.16741  | 0.36745  |
| C | 0.49637  | 3.35991  | -0.98049 |
| C | 0.57981  | 4.62824  | -1.56384 |
| C | 0.24859  | 5.72218  | -0.77235 |
| C | -0.15312 | 5.55677  | 0.56942  |
| C | -0.23604 | 4.29453  | 1.14334  |
| C | 7.22419  | 0.04217  | -0.42953 |
| C | 7.18123  | -1.48536 | -0.30233 |
| C | 5.97078  | -2.02494 | 0.47780  |
| C | 4.61602  | -1.78490 | -0.20239 |
| C | 3.44275  | -2.39059 | 0.57799  |
| C | 0.74927  | -0.31145 | -0.86744 |
| O | -4.21960 | -0.17637 | -2.37916 |
| O | -5.21959 | -1.91783 | -1.39988 |
| C | 0.51751  | 1.14406  | -0.54450 |
| C | 0.10960  | 1.75083  | 0.62193  |
| C | -0.22767 | 1.07783  | 1.91523  |
| C | -1.71061 | 0.77821  | 2.10988  |
| O | -2.59116 | 0.90558  | 1.28849  |
| O | -1.92678 | 0.31319  | 3.36418  |
| C | -3.28301 | -0.05694 | 3.65670  |
| N | 0.77354  | 2.11366  | -1.49796 |
| H | -1.49218 | -4.06605 | 0.90921  |

|   |          |          |          |
|---|----------|----------|----------|
| H | -2.55766 | 0.45381  | -2.36662 |
| H | -4.61946 | -3.17823 | -0.39609 |
| H | 1.00758  | -3.90814 | 0.61512  |
| H | 0.98550  | -2.54762 | 1.73556  |
| H | 2.10162  | -2.49916 | -1.11310 |
| H | 0.89353  | 4.75558  | -2.59695 |
| H | 0.30206  | 6.72197  | -1.19473 |
| H | -0.40378 | 6.43357  | 1.16048  |
| H | -0.55343 | 4.18150  | 2.17715  |
| H | 7.21941  | 0.51987  | 0.55827  |
| H | 8.13110  | 0.36810  | -0.95172 |
| H | 6.36553  | 0.43100  | -0.98796 |
| H | 8.09884  | -1.82675 | 0.19556  |
| H | 7.19458  | -1.93692 | -1.30493 |
| H | 5.95765  | -1.57276 | 1.48088  |
| H | 6.10426  | -3.10542 | 0.63369  |
| H | 4.63910  | -2.21622 | -1.21499 |
| H | 4.43365  | -0.71180 | -0.32527 |
| H | 3.41954  | -1.97609 | 1.59543  |
| H | 3.58181  | -3.47607 | 0.68255  |
| H | 1.04849  | -0.37562 | -1.93010 |
| H | -5.15267 | -0.05239 | -2.63557 |
| H | 0.31032  | 0.12729  | 2.00519  |
| H | 0.10121  | 1.67988  | 2.77182  |
| H | -3.27762 | -0.39617 | 4.69330  |
| H | -3.95158 | 0.79996  | 3.53705  |
| H | -3.61372 | -0.86043 | 2.99267  |
| H | 0.95889  | 1.91303  | -2.46880 |

Standard orientations of **1bc**

|   |          |          |          |
|---|----------|----------|----------|
| C | -1.17023 | -3.24095 | 0.36624  |
| C | -2.41389 | -3.03648 | -0.22519 |
| C | -2.61974 | -1.91325 | -1.08587 |
| C | -1.53703 | -1.00797 | -1.28064 |
| C | -0.31605 | -1.18404 | -0.61446 |
| C | -0.13119 | -2.32985 | 0.17398  |
| O | -1.59788 | 0.04523  | -2.12263 |
| O | -3.38020 | -3.93433 | 0.03095  |
| C | -3.93577 | -1.75028 | -1.68201 |
| C | 1.22071  | -2.58982 | 0.80218  |
| C | 2.31422  | -1.79322 | 0.09054  |
| O | 1.91317  | -0.42051 | 0.06020  |
| C | -0.34678 | 3.22844  | 0.35739  |
| C | 0.09095  | 3.45657  | -0.97610 |
| C | 0.03822  | 4.71893  | -1.57584 |
| C | -0.46072 | 5.77065  | -0.81574 |

|   |          |          |          |
|---|----------|----------|----------|
| C | -0.89392 | 5.57027  | 0.51141  |
| C | -0.84104 | 4.31398  | 1.10161  |
| C | 7.70092  | -0.96462 | -1.26941 |
| C | 7.26953  | -0.40108 | 0.08997  |
| C | 6.13469  | -1.18212 | 0.77335  |
| C | 4.78854  | -1.12597 | 0.03815  |
| C | 3.66995  | -1.85935 | 0.78889  |
| C | 0.79799  | -0.15233 | -0.79401 |
| O | -4.08318 | -0.66397 | -2.49716 |
| O | -4.90043 | -2.49641 | -1.51431 |
| C | 0.37308  | 1.26613  | -0.50404 |
| C | -0.15599 | 1.82912  | 0.63544  |
| C | -0.45746 | 1.13279  | 1.92522  |
| C | -1.89371 | 0.63743  | 2.06145  |
| O | -2.75773 | 0.67352  | 1.21389  |
| O | -2.08632 | 0.11523  | 3.29690  |
| C | -3.39162 | -0.43384 | 3.53504  |
| N | 0.54377  | 2.24976  | -1.46217 |
| H | -1.03187 | -4.12507 | 0.98020  |
| H | -2.51333 | 0.16789  | -2.43646 |
| H | -4.19068 | -3.65392 | -0.45946 |
| H | 1.43961  | -3.66455 | 0.77453  |
| H | 1.20721  | -2.29683 | 1.86196  |
| H | 2.41676  | -2.16205 | -0.94556 |
| H | 0.37598  | 4.87374  | -2.59755 |
| H | -0.51609 | 6.76456  | -1.25156 |
| H | -1.27757 | 6.41463  | 1.07785  |
| H | -1.18480 | 4.17277  | 2.12344  |
| H | 6.89078  | -0.92253 | -2.00612 |
| H | 8.54591  | -0.39953 | -1.67929 |
| H | 8.01424  | -2.01267 | -1.18041 |
| H | 6.96310  | 0.64789  | -0.02932 |
| H | 8.13898  | -0.38881 | 0.76098  |
| H | 5.99712  | -0.78582 | 1.78950  |
| H | 6.44172  | -2.23214 | 0.89583  |
| H | 4.89007  | -1.56270 | -0.96526 |
| H | 4.49006  | -0.08017 | -0.10592 |
| H | 3.55764  | -1.43532 | 1.79641  |
| H | 3.93762  | -2.91753 | 0.91986  |
| H | 1.14238  | -0.19172 | -1.84408 |
| H | -5.01349 | -0.66073 | -2.79086 |
| H | 0.20055  | 0.26684  | 2.05847  |
| H | -0.25400 | 1.78643  | 2.78325  |
| H | -3.37599 | -0.79175 | 4.56524  |
| H | -4.16210 | 0.33121  | 3.40632  |
| H | -3.59215 | -1.25933 | 2.84632  |

|                                     |          |          |          |
|-------------------------------------|----------|----------|----------|
| H                                   | 0.79474  | 2.06392  | -2.42113 |
| Standard orientations of <b>1bd</b> |          |          |          |
| C                                   | 0.24560  | -3.20393 | 0.60904  |
| C                                   | -0.87000 | -3.54902 | -0.14898 |
| C                                   | -1.39402 | -2.62807 | -1.10922 |
| C                                   | -0.76751 | -1.35437 | -1.23093 |
| C                                   | 0.30532  | -0.99215 | -0.40428 |
| C                                   | 0.83037  | -1.94339 | 0.48347  |
| O                                   | -1.13519 | -0.43577 | -2.14911 |
| O                                   | -1.40399 | -4.76625 | 0.04777  |
| C                                   | -2.55701 | -3.04119 | -1.87773 |
| C                                   | 2.06035  | -1.60222 | 1.29616  |
| C                                   | 2.81761  | -0.43027 | 0.67132  |
| O                                   | 1.89455  | 0.64699  | 0.48853  |
| C                                   | -1.69080 | 3.01065  | 0.23082  |
| C                                   | -1.20426 | 3.37932  | -1.05343 |
| C                                   | -1.69228 | 4.49051  | -1.74845 |
| C                                   | -2.68542 | 5.24597  | -1.13545 |
| C                                   | -3.17839 | 4.90443  | 0.14106  |
| C                                   | -2.69143 | 3.79860  | 0.82620  |
| C                                   | 7.51519  | -0.26094 | -1.42331 |
| C                                   | 6.68801  | -0.06026 | -0.14897 |
| C                                   | 5.55185  | 0.95686  | -0.32739 |
| C                                   | 4.74805  | 1.26296  | 0.94867  |
| C                                   | 3.95695  | 0.08699  | 1.54784  |
| C                                   | 0.90551  | 0.40969  | -0.51693 |
| O                                   | -3.02039 | -2.12825 | -2.78232 |
| O                                   | -3.13929 | -4.12132 | -1.77970 |
| C                                   | -0.10622 | 1.52160  | -0.38781 |
| C                                   | -0.97657 | 1.82778  | 0.63401  |
| C                                   | -1.13876 | 1.09092  | 1.92633  |
| C                                   | -2.23628 | 0.03151  | 1.92364  |
| O                                   | -2.90649 | -0.31801 | 0.97767  |
| O                                   | -2.36252 | -0.50435 | 3.16186  |
| C                                   | -3.33434 | -1.55482 | 3.28034  |
| N                                   | -0.22646 | 2.46885  | -1.38921 |
| H                                   | 0.64609  | -3.93957 | 1.29911  |
| H                                   | -1.96212 | -0.71401 | -2.58541 |
| H                                   | -2.17673 | -4.85903 | -0.56071 |
| H                                   | 2.70571  | -2.48584 | 1.37704  |
| H                                   | 1.77125  | -1.32684 | 2.32078  |
| H                                   | 3.20798  | -0.74028 | -0.31288 |
| H                                   | -1.30903 | 4.75575  | -2.73065 |
| H                                   | -3.08728 | 6.11563  | -1.64833 |
| H                                   | -3.95428 | 5.51735  | 0.59196  |

|   |          |          |          |
|---|----------|----------|----------|
| H | -3.08568 | 3.54323  | 1.80681  |
| H | 7.97503  | 0.68022  | -1.74911 |
| H | 8.31968  | -0.98917 | -1.26931 |
| H | 6.89036  | -0.62510 | -2.24839 |
| H | 7.34586  | 0.27473  | 0.66600  |
| H | 6.28003  | -1.02912 | 0.16973  |
| H | 4.87779  | 0.61077  | -1.12439 |
| H | 5.98100  | 1.90005  | -0.69447 |
| H | 4.04355  | 2.07640  | 0.74143  |
| H | 5.43846  | 1.63753  | 1.71718  |
| H | 3.52276  | 0.40403  | 2.50537  |
| H | 4.62469  | -0.75505 | 1.77283  |
| H | 1.38363  | 0.50432  | -1.50952 |
| H | -3.81466 | -2.52029 | -3.19122 |
| H | -0.20390 | 0.59152  | 2.20437  |
| H | -1.35420 | 1.78303  | 2.75060  |
| H | -3.31381 | -1.85680 | 4.32822  |
| H | -4.32898 | -1.19411 | 3.00448  |
| H | -3.06999 | -2.39669 | 2.63432  |
| H | 0.20936  | 2.38826  | -2.29514 |

Standard orientations of **1be**

|   |          |          |          |
|---|----------|----------|----------|
| C | -1.64914 | -2.99479 | 0.42521  |
| C | -2.89905 | -2.69697 | -0.10701 |
| C | -3.04227 | -1.59213 | -0.99955 |
| C | -1.88592 | -0.80116 | -1.28272 |
| C | -0.65080 | -1.06674 | -0.67514 |
| C | -0.53573 | -2.19888 | 0.14184  |
| O | -1.93200 | 0.21947  | -2.15931 |
| O | -3.91280 | -3.51656 | 0.24809  |
| C | -4.28970 | -1.22215 | -1.64682 |
| C | 0.82617  | -2.58348 | 0.67109  |
| C | 1.92166  | -2.00102 | -0.22428 |
| O | 1.73110  | -0.58529 | -0.29747 |
| C | 0.03678  | 3.27246  | 0.47116  |
| C | -0.08140 | 3.47226  | -0.93059 |
| C | -0.34711 | 4.72705  | -1.48801 |
| C | -0.48709 | 5.80038  | -0.61566 |
| C | -0.36257 | 5.62807  | 0.77861  |
| C | -0.10282 | 4.37872  | 1.32697  |
| C | 7.05035  | 0.02003  | -1.21294 |
| C | 6.98588  | -1.49610 | -0.99253 |
| C | 5.84714  | -1.95661 | -0.06724 |
| C | 4.43733  | -1.71565 | -0.62404 |
| C | 3.33408  | -2.24274 | 0.30209  |
| C | 0.54473  | -0.15816 | -0.96875 |

|   |          |          |          |
|---|----------|----------|----------|
| O | -5.37099 | -1.98835 | -1.31563 |
| O | -4.44444 | -0.29979 | -2.44830 |
| C | 0.31822  | 1.28092  | -0.56296 |
| C | 0.29178  | 1.87122  | 0.68255  |
| C | 0.51691  | 1.19992  | 2.00457  |
| C | -0.73781 | 0.58558  | 2.61410  |
| O | -1.87550 | 0.96298  | 2.45463  |
| O | -0.40846 | -0.46200 | 3.41640  |
| C | -1.51599 | -1.09178 | 4.08046  |
| N | 0.13059  | 2.25070  | -1.53422 |
| H | -1.55791 | -3.87223 | 1.05735  |
| H | -2.86601 | 0.30368  | -2.47966 |
| H | -4.73832 | -3.22471 | -0.17954 |
| H | 0.90686  | -3.67608 | 0.72682  |
| H | 0.95658  | -2.19600 | 1.69085  |
| H | 1.83015  | -2.43239 | -1.23659 |
| H | -0.43889 | 4.85939  | -2.56310 |
| H | -0.69512 | 6.78927  | -1.01532 |
| H | -0.47821 | 6.48848  | 1.43232  |
| H | -0.02392 | 4.25752  | 2.40449  |
| H | 7.15329  | 0.55263  | -0.25912 |
| H | 7.90882  | 0.29031  | -1.83854 |
| H | 6.15018  | 0.40072  | -1.70791 |
| H | 7.94048  | -1.83483 | -0.56767 |
| H | 6.88919  | -2.00348 | -1.96334 |
| H | 5.94466  | -1.44929 | 0.90436  |
| H | 5.97053  | -3.03019 | 0.13732  |
| H | 4.34894  | -2.20350 | -1.60689 |
| H | 4.26895  | -0.64646 | -0.79177 |
| H | 3.42000  | -1.77010 | 1.29042  |
| H | 3.46048  | -3.32354 | 0.45816  |
| H | 0.72805  | -0.17514 | -2.05774 |
| H | -6.13002 | -1.62728 | -1.81124 |
| H | 1.28313  | 0.42656  | 1.92376  |
| H | 0.88921  | 1.92965  | 2.73760  |
| H | -1.07776 | -1.86367 | 4.71466  |
| H | -2.06781 | -0.36626 | 4.68398  |
| H | -2.19570 | -1.53701 | 3.34887  |
| H | -0.13105 | 2.02594  | -2.48261 |

Standard orientations of **1bf**

|   |          |          |          |
|---|----------|----------|----------|
| C | -2.33718 | -2.82810 | 1.03594  |
| C | -3.62825 | -2.41199 | 0.72950  |
| C | -3.82549 | -1.32699 | -0.17779 |
| C | -2.66859 | -0.68130 | -0.71610 |
| C | -1.37469 | -1.06585 | -0.33988 |

|   |          |          |          |
|---|----------|----------|----------|
| C | -1.22244 | -2.17521 | 0.50377  |
| O | -2.77450 | 0.31164  | -1.61968 |
| O | -4.63410 | -3.10054 | 1.31196  |
| C | -5.12871 | -0.84514 | -0.60334 |
| C | 0.16879  | -2.69613 | 0.78519  |
| C | 1.12290  | -2.27886 | -0.33636 |
| O | 1.06957  | -0.85484 | -0.45225 |
| C | 0.09821  | 3.20845  | 0.30577  |
| C | -0.24954 | 3.35602  | -1.06399 |
| C | -0.42431 | 4.60909  | -1.66020 |
| C | -0.23211 | 5.73123  | -0.86240 |
| C | 0.13393  | 5.60844  | 0.49425  |
| C | 0.30584  | 4.36181  | 1.08170  |
| C | 6.12711  | -0.90218 | -2.42617 |
| C | 5.96622  | -2.38575 | -2.07343 |
| C | 4.98820  | -2.66286 | -0.91952 |
| C | 3.52679  | -2.30516 | -1.22272 |
| C | 2.57768  | -2.65601 | -0.07010 |
| C | -0.16976 | -0.32528 | -0.92302 |
| O | -6.20002 | -1.47942 | -0.04094 |
| O | -5.33803 | 0.06408  | -1.40763 |
| C | -0.13874 | 1.14993  | -0.60088 |
| C | 0.14955  | 1.79602  | 0.58093  |
| C | 0.44877  | 1.15504  | 1.90441  |
| C | 1.93273  | 1.06105  | 2.23136  |
| O | 2.76383  | 1.91018  | 2.00638  |
| O | 2.21494  | -0.09939 | 2.88134  |
| C | 3.57905  | -0.23511 | 3.31158  |
| N | -0.34637 | 2.08801  | -1.59819 |
| H | -2.21843 | -3.68404 | 1.69234  |
| H | -3.73807 | 0.48481  | -1.77059 |
| H | -5.49215 | -2.74023 | 1.02344  |
| H | 0.13983  | -3.78745 | 0.89187  |
| H | 0.55156  | -2.28760 | 1.73066  |
| H | 0.79143  | -2.73517 | -1.28586 |
| H | -0.69506 | 4.70307  | -2.70885 |
| H | -0.35835 | 6.72047  | -1.29423 |
| H | 0.29116  | 6.50705  | 1.08482  |
| H | 0.61134  | 4.27794  | 2.12095  |
| H | 6.45873  | -0.32339 | -1.55506 |
| H | 6.87138  | -0.76523 | -3.21908 |
| H | 5.18804  | -0.46022 | -2.77665 |
| H | 6.94896  | -2.79689 | -1.80541 |
| H | 5.63839  | -2.94083 | -2.96436 |
| H | 5.31829  | -2.10959 | -0.02716 |
| H | 5.04693  | -3.72883 | -0.65470 |

|   |          |          |          |
|---|----------|----------|----------|
| H | 3.20608  | -2.83700 | -2.13168 |
| H | 3.43144  | -1.23542 | -1.43747 |
| H | 2.89603  | -2.14178 | 0.84640  |
| H | 2.62157  | -3.73468 | 0.13766  |
| H | -0.20866 | -0.42797 | -2.02230 |
| H | -6.99864 | -1.05906 | -0.41199 |
| H | 0.00049  | 1.75423  | 2.71087  |
| H | 0.00578  | 0.16069  | 1.97598  |
| H | 3.62796  | -1.18908 | 3.83828  |
| H | 4.25539  | -0.23522 | 2.45247  |
| H | 3.85617  | 0.58648  | 3.97766  |
| H | -0.79228 | 1.86414  | -2.47526 |

Standard orientations of **1bg**

|   |          |          |          |
|---|----------|----------|----------|
| C | -2.31777 | -2.85403 | 0.99322  |
| C | -3.60648 | -2.42790 | 0.68346  |
| C | -3.79910 | -1.32997 | -0.21440 |
| C | -2.64221 | -0.68569 | -0.74498 |
| C | -1.35270 | -1.08154 | -0.36849 |
| C | -1.20337 | -2.19855 | 0.47058  |
| O | -2.70925 | 0.32095  | -1.64871 |
| O | -4.63174 | -3.09470 | 1.23719  |
| C | -5.16604 | -0.94851 | -0.53079 |
| C | 0.18699  | -2.71611 | 0.76238  |
| C | 1.15168  | -2.29484 | -0.34762 |
| O | 1.09466  | -0.87076 | -0.46100 |
| C | 0.09534  | 3.19644  | 0.27292  |
| C | -0.12748 | 3.33611  | -1.12372 |
| C | -0.21802 | 4.58580  | -1.74568 |
| C | -0.07049 | 5.71238  | -0.94481 |
| C | 0.17111  | 5.59699  | 0.44021  |
| C | 0.26138  | 4.35405  | 1.05295  |
| C | 6.17511  | -0.90706 | -2.38627 |
| C | 6.01403  | -2.39034 | -2.03240 |
| C | 5.02452  | -2.66765 | -0.88836 |
| C | 3.56526  | -2.31559 | -1.20809 |
| C | 2.60486  | -2.66636 | -0.06486 |
| C | -0.14097 | -0.34429 | -0.94438 |
| O | -5.29874 | 0.09883  | -1.40159 |
| O | -6.18468 | -1.47709 | -0.08799 |
| C | -0.10846 | 1.13245  | -0.63153 |
| C | 0.09124  | 1.78618  | 0.56451  |
| C | 0.25921  | 1.15102  | 1.91551  |
| C | 1.70217  | 1.10159  | 2.39840  |
| O | 2.48553  | 2.02354  | 2.37094  |
| O | 2.00479  | -0.11222 | 2.92708  |

|   |          |          |          |
|---|----------|----------|----------|
| C | 3.33089  | -0.22210 | 3.47034  |
| N | -0.21019 | 2.06450  | -1.65014 |
| H | -2.20472 | -3.71550 | 1.64327  |
| H | -3.64156 | 0.55491  | -1.81566 |
| H | -5.47120 | -2.68943 | 0.91237  |
| H | 0.15989  | -3.80747 | 0.86820  |
| H | 0.55814  | -2.30552 | 1.71154  |
| H | 0.83318  | -2.75080 | -1.30185 |
| H | -0.39137 | 4.67372  | -2.81537 |
| H | -0.13338 | 6.69914  | -1.39579 |
| H | 0.29803  | 6.49866  | 1.03336  |
| H | 0.47843  | 4.27356  | 2.11402  |
| H | 6.49681  | -0.32604 | -1.51289 |
| H | 6.92698  | -0.76970 | -3.17191 |
| H | 5.23852  | -0.46795 | -2.74702 |
| H | 6.99492  | -2.79837 | -1.75323 |
| H | 5.69717  | -2.94785 | -2.92577 |
| H | 5.34316  | -2.11147 | 0.00623  |
| H | 5.08364  | -3.73281 | -0.62059 |
| H | 3.25608  | -2.85096 | -2.11899 |
| H | 3.46859  | -1.24671 | -1.42694 |
| H | 2.91173  | -2.14795 | 0.85336  |
| H | 2.65055  | -3.74421 | 0.14660  |
| H | -0.17002 | -0.45352 | -2.04368 |
| H | -6.25640 | 0.24994  | -1.51190 |
| H | -0.28912 | 1.73883  | 2.66617  |
| H | -0.16046 | 0.14468  | 1.93491  |
| H | 3.40073  | -1.23330 | 3.87312  |
| H | 4.07990  | -0.06601 | 2.68942  |
| H | 3.48538  | 0.51798  | 4.26011  |
| H | -0.54105 | 1.83931  | -2.57601 |

Standard orientations of **1bh**

|   |          |          |          |
|---|----------|----------|----------|
| C | -1.49543 | -3.18007 | 1.15153  |
| C | -2.86615 | -3.12189 | 0.91507  |
| C | -3.39400 | -2.15338 | 0.00236  |
| C | -2.48058 | -1.25154 | -0.62026 |
| C | -1.11355 | -1.28060 | -0.32085 |
| C | -0.62471 | -2.27947 | 0.53838  |
| O | -2.86306 | -0.33417 | -1.54165 |
| O | -3.64564 | -4.00997 | 1.55265  |
| C | -4.82802 | -2.15861 | -0.23347 |
| C | 0.86660  | -2.39652 | 0.75094  |
| C | 1.61820  | -1.80270 | -0.44206 |
| O | 1.18415  | -0.44771 | -0.60586 |
| C | -0.79596 | 3.23230  | 0.17008  |

|   |          |          |          |
|---|----------|----------|----------|
| C | -1.11942 | 3.27802  | -1.21362 |
| C | -1.55812 | 4.44828  | -1.84157 |
| C | -1.66274 | 5.59464  | -1.06206 |
| C | -1.33289 | 5.57674  | 0.30921  |
| C | -0.89813 | 4.41177  | 0.92813  |
| C | 7.67793  | -2.22044 | -0.91494 |
| C | 6.16363  | -2.41545 | -1.04560 |
| C | 5.40767  | -1.09697 | -1.26316 |
| C | 3.89220  | -1.24493 | -1.47390 |
| C | 3.13253  | -1.77272 | -0.24877 |
| C | -0.17636 | -0.27842 | -0.99785 |
| O | -5.28266 | -1.22172 | -1.12239 |
| O | -5.64457 | -2.91610 | 0.28902  |
| C | -0.50912 | 1.16476  | -0.70225 |
| C | -0.41977 | 1.87620  | 0.47499  |
| C | -0.01063 | 1.34443  | 1.82140  |
| C | 1.48842  | 1.33319  | 2.09028  |
| O | 2.11599  | 0.37990  | 2.50688  |
| O | 2.04353  | 2.53786  | 1.85297  |
| C | 3.45831  | 2.62599  | 2.07901  |
| N | -0.90289 | 2.01488  | -1.72054 |
| H | -1.12176 | -3.95110 | 1.81729  |
| H | -3.83154 | -0.36391 | -1.65518 |
| H | -4.57915 | -3.85388 | 1.27264  |
| H | 1.13609  | -3.44922 | 0.89992  |
| H | 1.17232  | -1.84643 | 1.65089  |
| H | 1.37181  | -2.37410 | -1.35477 |
| H | -1.80381 | 4.46319  | -2.90051 |
| H | -1.99936 | 6.52147  | -1.51871 |
| H | -1.41694 | 6.49320  | 0.88719  |
| H | -0.63208 | 4.41431  | 1.98191  |
| H | 8.09677  | -1.75438 | -1.81553 |
| H | 7.92142  | -1.57151 | -0.06452 |
| H | 8.19429  | -3.17525 | -0.76285 |
| H | 5.95292  | -3.09361 | -1.88551 |
| H | 5.78725  | -2.91888 | -0.14526 |
| H | 5.83564  | -0.58787 | -2.13876 |
| H | 5.59057  | -0.43047 | -0.40666 |
| H | 3.70954  | -1.91063 | -2.33146 |
| H | 3.47082  | -0.26991 | -1.74451 |
| H | 3.34773  | -1.14691 | 0.62695  |
| H | 3.45898  | -2.79181 | -0.00308 |
| H | -0.25640 | -0.42503 | -2.09033 |
| H | -6.25052 | -1.33423 | -1.17353 |
| H | -0.36094 | 0.32124  | 1.97082  |
| H | -0.47208 | 1.95948  | 2.60609  |

|   |          |         |          |
|---|----------|---------|----------|
| H | 3.69999  | 2.38074 | 3.11687  |
| H | 3.99473  | 1.94030 | 1.41748  |
| H | 3.72582  | 3.65911 | 1.85535  |
| H | -1.20324 | 1.69158 | -2.62761 |

Standard orientations of **1bi**

|   |          |          |          |
|---|----------|----------|----------|
| C | -0.23598 | 3.73676  | 1.10913  |
| C | 1.13369  | 3.95410  | 0.96967  |
| C | 1.93283  | 3.03210  | 0.22366  |
| C | 1.29056  | 1.89324  | -0.33709 |
| C | -0.06800 | 1.63749  | -0.10307 |
| C | -0.83353 | 2.59240  | 0.57963  |
| O | 1.88944  | 1.00804  | -1.15096 |
| O | 1.65085  | 5.05791  | 1.53377  |
| C | 3.35466  | 3.31302  | 0.08372  |
| C | -2.32927 | 2.39239  | 0.67922  |
| C | -2.80803 | 1.45754  | -0.43275 |
| O | -2.06989 | 0.23503  | -0.33249 |
| C | 0.97285  | -2.81120 | 0.66529  |
| C | 0.11785  | -2.38274 | 1.71643  |
| C | -0.02557 | -3.10250 | 2.90664  |
| C | 0.70935  | -4.27502 | 3.04103  |
| C | 1.56648  | -4.71854 | 2.01373  |
| C | 1.70605  | -4.00037 | 0.83210  |
| C | -8.20535 | -1.35887 | -0.33979 |
| C | -6.71693 | -0.99748 | -0.29300 |
| C | -6.28486 | -0.09697 | -1.45937 |
| C | -4.78299 | 0.22895  | -1.50301 |
| C | -4.28950 | 1.10001  | -0.33937 |
| C | -0.66805 | 0.32875  | -0.62477 |
| O | 4.06429  | 2.38427  | -0.60930 |
| O | 3.93734  | 4.29539  | 0.54631  |
| C | -0.06156 | -0.90046 | 0.01996  |
| C | 0.84458  | -1.85020 | -0.40644 |
| C | 1.54411  | -1.93337 | -1.74017 |
| C | 3.06776  | -1.91236 | -1.63476 |
| O | 3.76805  | -0.95097 | -1.38270 |
| O | 3.58807  | -3.13740 | -1.87232 |
| C | 5.01977  | -3.23330 | -1.77737 |
| N | -0.47053 | -1.20729 | 1.30701  |
| H | -0.82299 | 4.48156  | 1.63687  |
| H | 2.86443  | 1.00025  | -1.09430 |
| H | 2.61699  | 5.07742  | 1.32528  |
| H | -2.83779 | 3.36253  | 0.62089  |
| H | -2.60011 | 1.95077  | 1.64942  |
| H | -2.60453 | 1.92491  | -1.41108 |

|   |          |          |          |
|---|----------|----------|----------|
| H | -0.68700 | -2.75811 | 3.69746  |
| H | 0.62095  | -4.85856 | 3.95346  |
| H | 2.12597  | -5.64023 | 2.15024  |
| H | 2.36617  | -4.35442 | 0.04617  |
| H | -8.45484 | -1.89091 | -1.26615 |
| H | -8.48815 | -2.00292 | 0.50070  |
| H | -8.83327 | -0.46022 | -0.29655 |
| H | -6.11515 | -1.91742 | -0.30773 |
| H | -6.49688 | -0.50496 | 0.66356  |
| H | -6.86259 | 0.83947  | -1.42789 |
| H | -6.56172 | -0.58994 | -2.40211 |
| H | -4.56203 | 0.74820  | -2.44668 |
| H | -4.20199 | -0.70123 | -1.52076 |
| H | -4.45671 | 0.59162  | 0.61906  |
| H | -4.86534 | 2.03600  | -0.30546 |
| H | -0.51868 | 0.26756  | -1.71285 |
| H | 4.99460  | 2.67698  | -0.59860 |
| H | 1.26076  | -2.85527 | -2.26034 |
| H | 1.26015  | -1.08311 | -2.36380 |
| H | 5.25752  | -4.27331 | -2.00197 |
| H | 5.49656  | -2.56465 | -2.49873 |
| H | 5.35448  | -2.96988 | -0.77076 |
| H | -1.28582 | -0.77958 | 1.71952  |

Standard orientations of **1bj**

|   |          |          |          |
|---|----------|----------|----------|
| C | 1.96563  | -2.98254 | -1.16283 |
| C | 3.28885  | -2.74259 | -0.80255 |
| C | 3.59328  | -1.73692 | 0.16942  |
| C | 2.51221  | -0.98701 | 0.72075  |
| C | 1.19372  | -1.19261 | 0.29575  |
| C | 0.92831  | -2.22634 | -0.61799 |
| O | 2.68029  | -0.05599 | 1.68996  |
| O | 4.23719  | -3.49660 | -1.38095 |
| C | 4.98838  | -1.55167 | 0.53482  |
| C | -0.50761 | -2.54481 | -0.96858 |
| C | -1.44131 | -2.07594 | 0.14883  |
| O | -1.20973 | -0.68068 | 0.35706  |
| C | 0.31181  | 3.26651  | -0.08492 |
| C | 0.50409  | 3.28748  | 1.32303  |
| C | 0.72778  | 4.47356  | 2.03012  |
| C | 0.74708  | 5.65864  | 1.30379  |
| C | 0.53868  | 5.66332  | -0.09139 |
| C | 0.31568  | 4.48335  | -0.78886 |
| C | -6.29619 | -2.39228 | 2.95728  |
| C | -6.32348 | -1.53568 | 1.68565  |
| C | -5.34367 | -1.98889 | 0.59047  |

|   |          |          |          |
|---|----------|----------|----------|
| C | -3.86109 | -1.84411 | 0.96034  |
| C | -2.92144 | -2.24198 | -0.18482 |
| C | 0.06859  | -0.34647 | 0.89696  |
| O | 5.22772  | -0.58735 | 1.47584  |
| O | 5.94445  | -2.17492 | 0.07591  |
| C | 0.22909  | 1.13950  | 0.68290  |
| C | 0.15118  | 1.88834  | -0.47088 |
| C | -0.04708 | 1.36669  | -1.86609 |
| C | -1.46318 | 1.54632  | -2.39522 |
| O | -2.10398 | 2.57227  | -2.35410 |
| O | -1.92138 | 0.40997  | -2.98037 |
| C | -3.23075 | 0.51522  | -3.56384 |
| N | 0.41185  | 1.98450  | 1.76417  |
| H | 1.76316  | -3.77985 | -1.87047 |
| H | 3.62968  | 0.04734  | 1.88931  |
| H | 5.11186  | -3.22150 | -1.01525 |
| H | -0.61406 | -3.62198 | -1.14569 |
| H | -0.79936 | -2.03144 | -1.89516 |
| H | -1.20795 | -2.62804 | 1.07658  |
| H | 0.87540  | 4.47040  | 3.10725  |
| H | 0.91655  | 6.59882  | 1.82186  |
| H | 0.54353  | 6.60989  | -0.62517 |
| H | 0.12398  | 4.49846  | -1.85764 |
| H | -5.32325 | -2.34879 | 3.45955  |
| H | -7.05112 | -2.05337 | 3.67599  |
| H | -6.50471 | -3.44522 | 2.72831  |
| H | -6.11320 | -0.48846 | 1.94519  |
| H | -7.34078 | -1.54754 | 1.27168  |
| H | -5.53758 | -1.40262 | -0.31924 |
| H | -5.55533 | -3.03671 | 0.32736  |
| H | -3.63182 | -2.46091 | 1.84063  |
| H | -3.65172 | -0.80538 | 1.24423  |
| H | -3.13630 | -1.63375 | -1.07360 |
| H | -3.09572 | -3.29050 | -0.46557 |
| H | 0.05459  | -0.52838 | 1.98694  |
| H | 6.19357  | -0.56535 | 1.61293  |
| H | 0.60482  | 1.91932  | -2.55829 |
| H | 0.23304  | 0.31535  | -1.93815 |
| H | -3.43394 | -0.46005 | -4.00788 |
| H | -3.97424 | 0.75233  | -2.79822 |
| H | -3.24950 | 1.29708  | -4.32780 |
| H | 0.67944  | 1.66114  | 2.68135  |

Standard orientations of **1bk**

|   |          |         |         |
|---|----------|---------|---------|
| C | -0.78216 | 3.53269 | 1.19955 |
| C | 0.51546  | 3.99213 | 0.98084 |

|   |          |          |          |
|---|----------|----------|----------|
| C | 1.42346  | 3.22289  | 0.18770  |
| C | 0.96593  | 1.98212  | -0.33676 |
| C | -0.30819 | 1.48756  | -0.02395 |
| C | -1.19293 | 2.29472  | 0.70389  |
| O | 1.66635  | 1.21252  | -1.18635 |
| O | 0.85664  | 5.17592  | 1.51590  |
| C | 2.76084  | 3.75417  | -0.03440 |
| C | -2.61988 | 1.82934  | 0.89028  |
| C | -2.98486 | 0.81184  | -0.19184 |
| O | -2.03266 | -0.25555 | -0.13411 |
| C | 1.56405  | -2.69379 | 0.66976  |
| C | 0.71079  | -2.41707 | 1.77199  |
| C | 0.77158  | -3.14039 | 2.96711  |
| C | 1.71252  | -4.16024 | 3.05383  |
| C | 2.57195  | -4.45121 | 1.97522  |
| C | 2.50825  | -3.73001 | 0.78891  |
| C | -8.65709 | -1.32591 | -0.80949 |
| C | -7.33785 | -0.55853 | -0.94725 |
| C | -6.10806 | -1.47773 | -0.93342 |
| C | -4.76250 | -0.76523 | -1.14433 |
| C | -4.37038 | 0.19528  | -0.01284 |
| C | -0.69116 | 0.08723  | -0.51127 |
| O | 3.58515  | 2.96239  | -0.76926 |
| O | 3.18249  | 4.82941  | 0.39524  |
| C | 0.16520  | -1.00628 | 0.09294  |
| C | 1.20033  | -1.78094 | -0.38992 |
| C | 1.82235  | -1.74740 | -1.76363 |
| C | 3.32086  | -1.45197 | -1.74975 |
| O | 3.85046  | -0.37864 | -1.53604 |
| O | 4.03797  | -2.56500 | -2.02328 |
| C | 5.46662  | -2.40119 | -2.01481 |
| N | -0.10337 | -1.37031 | 1.40187  |
| H | -1.46243 | 4.16417  | 1.76195  |
| H | 2.62841  | 1.38065  | -1.18668 |
| H | 1.78961  | 5.36762  | 1.25120  |
| H | -3.29760 | 2.69136  | 0.86166  |
| H | -2.75066 | 1.35628  | 1.87455  |
| H | -2.92521 | 1.29798  | -1.18029 |
| H | 0.10782  | -2.91379 | 3.79753  |
| H | 1.78595  | -4.74214 | 3.96863  |
| H | 3.29553  | -5.25596 | 2.07525  |
| H | 3.17261  | -3.96640 | -0.03666 |
| H | -8.69180 | -1.88814 | 0.13191  |
| H | -9.51875 | -0.64875 | -0.82450 |
| H | -8.78388 | -2.04550 | -1.62773 |
| H | -7.26509 | 0.17870  | -0.13638 |

|   |          |          |          |
|---|----------|----------|----------|
| H | -7.34561 | 0.01798  | -1.88378 |
| H | -6.22825 | -2.23588 | -1.72027 |
| H | -6.08038 | -2.03190 | 0.01690  |
| H | -4.79077 | -0.21119 | -2.09475 |
| H | -3.96987 | -1.51496 | -1.24697 |
| H | -4.38885 | -0.33781 | 0.94867  |
| H | -5.09580 | 1.01525  | 0.06691  |
| H | -0.59900 | 0.04422  | -1.60656 |
| H | 4.44641  | 3.41805  | -0.81255 |
| H | 1.67875  | -2.70899 | -2.26902 |
| H | 1.35349  | -0.96647 | -2.36602 |
| H | 5.87375  | -3.38309 | -2.25710 |
| H | 5.77140  | -1.66287 | -2.76098 |
| H | 5.80796  | -2.07464 | -1.02914 |
| H | -0.95604 | -1.09270 | 1.86416  |

Standard orientations of **1bl**

|   |          |          |          |
|---|----------|----------|----------|
| C | 2.57770  | -2.33747 | -1.43001 |
| C | 3.78295  | -1.85316 | -0.93318 |
| C | 3.78041  | -0.91859 | 0.14706  |
| C | 2.51660  | -0.48899 | 0.66045  |
| C | 1.31187  | -0.93597 | 0.10329  |
| C | 1.35481  | -1.89705 | -0.91694 |
| O | 2.43124  | 0.35099  | 1.71009  |
| O | 4.90593  | -2.33307 | -1.51126 |
| C | 4.97964  | -0.38572 | 0.76966  |
| C | 0.05821  | -2.49142 | -1.41569 |
| C | -1.01821 | -2.38111 | -0.33282 |
| O | -1.14474 | -1.00022 | 0.02615  |
| C | -0.55133 | 3.21032  | -0.06190 |
| C | -0.41704 | 3.17192  | 1.35276  |
| C | -0.48814 | 4.32383  | 2.14271  |
| C | -0.70986 | 5.53385  | 1.49510  |
| C | -0.86262 | 5.59405  | 0.09424  |
| C | -0.78979 | 4.44719  | -0.68594 |
| C | -4.69710 | -2.45696 | 3.19966  |
| C | -4.52196 | -3.76136 | 2.41265  |
| C | -3.34219 | -3.75520 | 1.42567  |
| C | -3.50149 | -2.76940 | 0.25805  |
| C | -2.39335 | -2.85188 | -0.80475 |
| C | -0.01112 | -0.42760 | 0.67576  |
| O | 6.15998  | -0.81042 | 0.22765  |
| O | 5.01673  | 0.39691  | 1.72057  |
| C | -0.18399 | 1.06869  | 0.56657  |
| C | -0.38827 | 1.86240  | -0.54159 |
| C | -0.42407 | 1.41638  | -1.97735 |

|   |          |          |          |
|---|----------|----------|----------|
| C | -1.76856 | 0.90505  | -2.47702 |
| O | -1.93199 | -0.11975 | -3.10935 |
| O | -2.76762 | 1.75764  | -2.17810 |
| C | -4.07569 | 1.36050  | -2.61546 |
| N | -0.23177 | 1.85238  | 1.70634  |
| H | 2.61202  | -3.07811 | -2.22232 |
| H | 3.35259  | 0.59196  | 1.98203  |
| H | 5.69005  | -1.94241 | -1.08499 |
| H | 0.21855  | -3.53749 | -1.70419 |
| H | -0.29843 | -1.95501 | -2.30515 |
| H | -0.70075 | -2.95615 | 0.55324  |
| H | -0.37808 | 4.27531  | 3.22312  |
| H | -0.77131 | 6.44815  | 2.07915  |
| H | -1.04428 | 6.55536  | -0.37899 |
| H | -0.92255 | 4.50515  | -1.76322 |
| H | -3.78798 | -2.21243 | 3.76369  |
| H | -4.91521 | -1.60852 | 2.54188  |
| H | -5.52146 | -2.53779 | 3.91761  |
| H | -4.38276 | -4.58863 | 3.12190  |
| H | -5.44862 | -3.98443 | 1.86423  |
| H | -3.21808 | -4.76949 | 1.01835  |
| H | -2.41897 | -3.53480 | 1.98083  |
| H | -3.54598 | -1.74064 | 0.63275  |
| H | -4.46461 | -2.96487 | -0.23487 |
| H | -2.66948 | -2.24098 | -1.67232 |
| H | -2.29402 | -3.88768 | -1.16000 |
| H | -0.03949 | -0.69169 | 1.74827  |
| H | 6.87100  | -0.37851 | 0.73752  |
| H | 0.29988  | 0.62149  | -2.16831 |
| H | -0.14591 | 2.26155  | -2.62199 |
| H | -4.74241 | 2.16843  | -2.31265 |
| H | -4.09723 | 1.22853  | -3.70074 |
| H | -4.37019 | 0.42239  | -2.13722 |
| H | 0.09557  | 1.53428  | 2.60627  |

Standard orientations of **1bm**

|   |          |          |          |
|---|----------|----------|----------|
| C | -1.33414 | -3.14730 | 1.27028  |
| C | -2.69666 | -3.17072 | 0.99276  |
| C | -3.23981 | -2.26672 | 0.02940  |
| C | -2.35008 | -1.33899 | -0.59756 |
| C | -0.99273 | -1.28466 | -0.25665 |
| C | -0.48566 | -2.22608 | 0.65047  |
| O | -2.77609 | -0.48950 | -1.55225 |
| O | -3.42857 | -4.09051 | 1.65902  |
| C | -4.63677 | -2.23728 | -0.36719 |
| C | 1.00306  | -2.26662 | 0.90569  |

|   |          |          |          |
|---|----------|----------|----------|
| C | 1.75594  | -1.68014 | -0.29107 |
| O | 1.26735  | -0.35208 | -0.51154 |
| C | -0.90478 | 3.25006  | 0.10437  |
| C | -1.24594 | 3.22409  | -1.27536 |
| C | -1.76373 | 4.34086  | -1.93922 |
| C | -1.92939 | 5.50709  | -1.20086 |
| C | -1.58218 | 5.56107  | 0.16512  |
| C | -1.06954 | 4.44865  | 0.82013  |
| C | 6.39348  | -3.14201 | -1.79919 |
| C | 6.35440  | -2.07530 | -0.69843 |
| C | 5.52604  | -0.82763 | -1.05349 |
| C | 4.02472  | -1.05963 | -1.29618 |
| C | 3.26321  | -1.57872 | -0.06879 |
| C | -0.08959 | -0.25887 | -0.94105 |
| O | -5.44820 | -3.12803 | 0.27738  |
| O | -5.13472 | -1.49397 | -1.21433 |
| C | -0.50256 | 1.17292  | -0.69572 |
| C | -0.44488 | 1.93103  | 0.45394  |
| C | -0.00038 | 1.47334  | 1.81586  |
| C | 1.49864  | 1.53506  | 2.07627  |
| O | 2.15965  | 0.63558  | 2.55653  |
| O | 2.01009  | 2.73936  | 1.75523  |
| C | 3.42037  | 2.89388  | 1.97236  |
| N | -0.95559 | 1.95928  | -1.74061 |
| H | -0.94353 | -3.87378 | 1.97536  |
| H | -3.74913 | -0.63015 | -1.67195 |
| H | -4.36169 | -4.03210 | 1.38506  |
| H | 1.31639  | -3.30002 | 1.09825  |
| H | 1.26197  | -1.67274 | 1.79241  |
| H | 1.55421  | -2.29264 | -1.18793 |
| H | -2.02362 | 4.30054  | -2.99401 |
| H | -2.32867 | 6.39360  | -1.68617 |
| H | -1.71552 | 6.49174  | 0.71022  |
| H | -0.79266 | 4.50679  | 1.86960  |
| H | 5.40010  | -3.55888 | -2.00136 |
| H | 6.77337  | -2.72446 | -2.74028 |
| H | 7.04730  | -3.97550 | -1.51756 |
| H | 5.97657  | -2.52247 | 0.23091  |
| H | 7.38152  | -1.75448 | -0.47786 |
| H | 5.95783  | -0.36465 | -1.95260 |
| H | 5.64076  | -0.08911 | -0.24682 |
| H | 3.88425  | -1.75655 | -2.13494 |
| H | 3.56888  | -0.11293 | -1.60823 |
| H | 3.43422  | -0.91728 | 0.79009  |
| H | 3.62686  | -2.57493 | 0.21674  |
| H | -0.13570 | -0.44030 | -2.03000 |

|   |          |          |          |
|---|----------|----------|----------|
| H | -6.34528 | -2.99823 | -0.08383 |
| H | -0.30666 | 0.44376  | 2.01187  |
| H | -0.48207 | 2.10003  | 2.57906  |
| H | 3.67089  | 2.72375  | 3.02309  |
| H | 3.98215  | 2.18819  | 1.35421  |
| H | 3.64956  | 3.91994  | 1.68319  |
| H | -1.27549 | 1.57690  | -2.61790 |

Standard orientations of **1bn**

|   |          |          |          |
|---|----------|----------|----------|
| C | 2.58194  | -2.35276 | -1.41345 |
| C | 3.78425  | -1.85750 | -0.91614 |
| C | 3.77837  | -0.91315 | 0.15990  |
| C | 2.51634  | -0.48824 | 0.67177  |
| C | 1.31590  | -0.94582 | 0.11600  |
| C | 1.36094  | -1.91295 | -0.90270 |
| O | 2.39443  | 0.35717  | 1.72401  |
| O | 4.92044  | -2.31381 | -1.46723 |
| C | 5.06227  | -0.45462 | 0.66331  |
| C | 0.06596  | -2.50763 | -1.40509 |
| C | -1.01704 | -2.39616 | -0.32997 |
| O | -1.14254 | -1.01518 | 0.02889  |
| C | -0.56033 | 3.19622  | -0.03881 |
| C | -0.48951 | 3.14421  | 1.38021  |
| C | -0.61289 | 4.28618  | 2.17832  |
| C | -0.82117 | 5.50032  | 1.53396  |
| C | -0.90979 | 5.57409  | 0.12818  |
| C | -0.78611 | 4.43703  | -0.65987 |
| C | -4.71746 | -2.47596 | 3.17766  |
| C | -4.54803 | -3.77599 | 2.38222  |
| C | -3.36191 | -3.77245 | 1.40287  |
| C | -3.50643 | -2.77822 | 0.24049  |
| C | -2.39030 | -2.86028 | -0.81386 |
| C | -0.01264 | -0.44373 | 0.68521  |
| O | 5.00428  | 0.43850  | 1.69946  |
| O | 6.16749  | -0.79429 | 0.24305  |
| C | -0.19424 | 1.05204  | 0.58294  |
| C | -0.36025 | 1.85557  | -0.52467 |
| C | -0.33750 | 1.42210  | -1.96494 |
| C | -1.66706 | 0.92609  | -2.51805 |
| O | -1.82455 | -0.11040 | -3.13215 |
| O | -2.66017 | 1.80642  | -2.28543 |
| C | -3.95572 | 1.42492  | -2.77183 |
| N | -0.29971 | 1.82386  | 1.72656  |
| H | 2.62045  | -3.09747 | -2.20167 |
| H | 3.27782  | 0.64969  | 2.01690  |
| H | 5.67901  | -1.88645 | -1.00233 |

|   |          |          |          |
|---|----------|----------|----------|
| H | 0.22767  | -3.55380 | -1.69212 |
| H | -0.28442 | -1.97058 | -2.29662 |
| H | -0.70873 | -2.97315 | 0.55814  |
| H | -0.55308 | 4.22708  | 3.26222  |
| H | -0.92270 | 6.40708  | 2.12416  |
| H | -1.08264 | 6.53814  | -0.34274 |
| H | -0.87146 | 4.50472  | -1.74127 |
| H | -4.92356 | -1.62083 | 2.52465  |
| H | -5.54751 | -2.55486 | 3.88922  |
| H | -3.81020 | -2.24368 | 3.74990  |
| H | -5.47295 | -3.98725 | 1.82630  |
| H | -4.42035 | -4.60951 | 3.08627  |
| H | -3.24278 | -4.78501 | 0.98991  |
| H | -2.44056 | -3.56269 | 1.96527  |
| H | -3.54828 | -1.75152 | 0.62108  |
| H | -4.46669 | -2.96512 | -0.26119 |
| H | -2.65704 | -2.24394 | -1.68070 |
| H | -2.29232 | -3.89461 | -1.17361 |
| H | -0.04505 | -0.71357 | 1.75645  |
| H | 5.92678  | 0.66327  | 1.92415  |
| H | -0.02698 | 2.27006  | -2.59063 |
| H | 0.38634  | 0.62175  | -2.13090 |
| H | -4.61900 | 2.25119  | -2.51440 |
| H | -3.93248 | 1.27147  | -3.85424 |
| H | -4.28885 | 0.50227  | -2.28896 |
| H | -0.04305 | 1.49326  | 2.64435  |

Standard orientations of **2aa**

|   |          |          |          |
|---|----------|----------|----------|
| C | 1.35760  | 2.95650  | -0.37260 |
| C | 0.27510  | 3.55470  | -1.00760 |
| C | -1.02470 | 3.12420  | -0.73900 |
| C | -1.21460 | 2.07020  | 0.18170  |
| C | -0.12620 | 1.43080  | 0.82900  |
| C | 1.18200  | 1.90550  | 0.54980  |
| C | -2.21040 | 3.73290  | -1.38850 |
| O | -1.92170 | 4.73200  | -2.24630 |
| O | -3.36360 | 3.38850  | -1.19120 |
| O | -2.47950 | 1.62380  | 0.48670  |
| O | 0.59050  | 4.56370  | -1.87740 |
| C | 2.45090  | 1.34990  | 1.18080  |
| C | 3.13230  | 0.26640  | 0.32250  |
| O | 2.55020  | -1.00720 | 0.59260  |
| C | 4.62770  | 0.17650  | 0.66300  |
| C | 5.35990  | -0.85400 | -0.20450 |
| C | 6.85370  | -0.89410 | 0.12400  |
| C | 7.58570  | -1.92020 | -0.74060 |

|   |          |          |          |
|---|----------|----------|----------|
| C | 9.07070  | -1.96290 | -0.41750 |
| O | -4.72200 | -1.17960 | 1.86300  |
| C | -2.80920 | -5.41040 | -1.20710 |
| C | -2.89860 | -4.41210 | -3.49990 |
| C | -3.58970 | -1.36310 | 1.42930  |
| C | -2.30140 | -1.08910 | 2.21130  |
| N | -1.21790 | -0.77600 | 1.28900  |
| C | -0.96220 | -1.54500 | 0.17220  |
| C | -2.08620 | -2.57410 | -0.13260 |
| N | -3.38860 | -2.00450 | 0.22390  |
| C | -2.37540 | 0.11150  | 3.14300  |
| C | -0.94970 | 0.66630  | 3.14910  |
| C | -0.34310 | 0.26740  | 1.79310  |
| O | 0.10000  | -1.48960 | -0.44470 |
| C | -2.03260 | -3.00960 | -1.60360 |
| C | -3.02530 | -4.12180 | -2.00140 |
| H | 2.35830  | 3.32090  | -0.60290 |
| H | -2.80450 | 5.01360  | -2.57840 |
| H | -3.15280 | 2.11380  | -0.03330 |
| H | -0.24520 | 4.90350  | -2.26090 |
| H | 3.13770  | 2.19700  | 1.31710  |
| H | 2.25260  | 0.98830  | 2.19550  |
| H | 3.02120  | 0.47670  | -0.74810 |
| H | 1.71640  | -1.06980 | 0.07340  |
| H | 5.09570  | 1.15900  | 0.52670  |
| H | 4.74730  | -0.10460 | 1.71710  |
| H | 4.92750  | -1.84960 | -0.04940 |
| H | 5.22400  | -0.60320 | -1.26350 |
| H | 7.29180  | 0.09880  | -0.03440 |
| H | 6.99030  | -1.14220 | 1.18370  |
| H | 7.15460  | -2.91570 | -0.58280 |
| H | 7.45540  | -1.67450 | -1.80100 |
| H | 9.57440  | -2.70300 | -1.04710 |
| H | 9.53920  | -0.98980 | -0.59600 |
| H | 9.23670  | -2.23780 | 0.62900  |
| H | -3.46940 | -6.20560 | -1.56990 |
| H | -1.77610 | -5.76300 | -1.29550 |
| H | -3.03230 | -5.26620 | -0.14580 |
| H | -3.62470 | -5.17030 | -3.81220 |
| H | -3.08790 | -3.50830 | -4.08870 |
| H | -1.89730 | -4.77810 | -3.75140 |
| H | -2.02310 | -1.99900 | 2.75680  |
| H | -1.90850 | -3.42540 | 0.53460  |
| H | -4.23990 | -2.26210 | -0.27830 |
| H | -2.70780 | -0.17120 | 4.14720  |
| H | -3.07800 | 0.86850  | 2.77910  |

|   |          |          |          |
|---|----------|----------|----------|
| H | -0.38660 | 0.17360  | 3.95220  |
| H | -0.92360 | 1.74230  | 3.34880  |
| H | 0.60340  | -0.23890 | 1.98790  |
| H | -1.01520 | -3.34830 | -1.84130 |
| H | -2.21440 | -2.13080 | -2.23760 |
| H | -4.04990 | -3.77650 | -1.82160 |

Standard orientations of **2ab**

|   |          |          |          |
|---|----------|----------|----------|
| C | 1.35510  | 2.95900  | -0.38900 |
| C | 0.27040  | 3.55130  | -1.02480 |
| C | -1.03050 | 3.11960  | -0.75440 |
| C | -1.21800 | 2.07010  | 0.16900  |
| C | -0.12670 | 1.43610  | 0.81850  |
| C | 1.18120  | 1.91210  | 0.53760  |
| C | -2.14450 | 3.79680  | -1.46160 |
| O | -3.36680 | 3.31940  | -1.15620 |
| O | -2.00800 | 4.70990  | -2.25890 |
| O | -2.47820 | 1.62060  | 0.47770  |
| O | 0.57990  | 4.56000  | -1.90050 |
| C | 2.45110  | 1.36260  | 1.17200  |
| C | 3.13510  | 0.27540  | 0.32030  |
| O | 2.55770  | -0.99820 | 0.60070  |
| C | 4.63130  | 0.19310  | 0.65900  |
| C | 5.36560  | -0.84110 | -0.20220 |
| C | 6.86010  | -0.87380 | 0.12420  |
| C | 7.59420  | -1.90360 | -0.73420 |
| C | 9.07980  | -1.93890 | -0.41320 |
| O | -4.72200 | -1.13960 | 1.83470  |
| C | -2.80350 | -5.42480 | -1.16690 |
| C | -2.87360 | -4.45280 | -3.47170 |
| C | -3.58720 | -1.34220 | 1.41640  |
| C | -2.30340 | -1.07380 | 2.20830  |
| N | -1.21330 | -0.77080 | 1.29020  |
| C | -0.95350 | -1.54900 | 0.18050  |
| C | -2.07800 | -2.57880 | -0.12040 |
| N | -3.38070 | -1.99940 | 0.22010  |
| C | -2.37540 | 0.12990  | 3.13620  |
| C | -0.94820 | 0.68110  | 3.14270  |
| C | -0.34030 | 0.27680  | 1.78890  |
| O | 0.11070  | -1.49940 | -0.43290 |
| C | -2.01560 | -3.03160 | -1.58570 |
| C | -3.00950 | -4.14470 | -1.97750 |
| H | 2.35440  | 3.32530  | -0.62170 |
| H | -3.97520 | 3.86840  | -1.70170 |
| H | -3.13480 | 2.11790  | -0.05350 |
| H | -0.24690 | 4.91230  | -2.29570 |

|   |          |          |          |
|---|----------|----------|----------|
| H | 3.13610  | 2.21180  | 1.30360  |
| H | 2.25330  | 1.00660  | 2.18880  |
| H | 3.02150  | 0.47770  | -0.75160 |
| H | 1.72550  | -1.06890 | 0.08020  |
| H | 5.09570  | 1.17620  | 0.51480  |
| H | 4.75350  | -0.07990 | 1.71500  |
| H | 4.93690  | -1.83700 | -0.03920 |
| H | 5.22720  | -0.59840 | -1.26270 |
| H | 7.29450  | 0.11950  | -0.04210 |
| H | 6.99920  | -1.11370 | 1.18540  |
| H | 7.16680  | -2.89930 | -0.56850 |
| H | 7.46130  | -1.66600 | -1.79610 |
| H | 9.58510  | -2.68180 | -1.03820 |
| H | 9.54470  | -0.96550 | -0.59940 |
| H | 9.24850  | -2.20560 | 0.63500  |
| H | -3.46410 | -6.22190 | -1.52500 |
| H | -1.77110 | -5.78210 | -1.24410 |
| H | -3.03340 | -5.26760 | -0.10890 |
| H | -3.60020 | -5.21210 | -3.78020 |
| H | -3.05560 | -3.55520 | -4.07220 |
| H | -1.87190 | -4.82520 | -3.71200 |
| H | -2.03430 | -1.98390 | 2.75810  |
| H | -1.90820 | -3.42270 | 0.55800  |
| H | -4.22900 | -2.25880 | -0.28610 |
| H | -2.70930 | -0.14940 | 4.14090  |
| H | -3.07590 | 0.88770  | 2.77030  |
| H | -0.38780 | 0.18900  | 3.94810  |
| H | -0.91940 | 1.75760  | 3.33950  |
| H | 0.60740  | -0.22630 | 1.98610  |
| H | -0.99780 | -3.37650 | -1.81220 |
| H | -2.18970 | -2.15960 | -2.23120 |
| H | -4.03410 | -3.79380 | -1.80880 |

Standard orientations of **2ac**

|   |          |         |          |
|---|----------|---------|----------|
| C | -0.98290 | 2.84210 | -0.10530 |
| C | 0.17250  | 3.39310 | 0.43740  |
| C | 1.40940  | 2.78300 | 0.22680  |
| C | 1.46020  | 1.59800 | -0.53960 |
| C | 0.29340  | 1.00200 | -1.08280 |
| C | -0.94630 | 1.65950 | -0.87090 |
| C | 2.66860  | 3.33160 | 0.78480  |
| O | 2.51280  | 4.46710 | 1.49420  |
| O | 3.77000  | 2.82870 | 0.63800  |
| O | 2.66040  | 0.97250 | -0.78710 |
| O | -0.00930 | 4.54150 | 1.15990  |
| C | -2.28140 | 1.17390 | -1.41710 |

|   |          |          |          |
|---|----------|----------|----------|
| C | -3.07380 | 0.31450  | -0.41280 |
| O | -2.66020 | -1.04720 | -0.50500 |
| C | -4.57580 | 0.36740  | -0.73140 |
| C | -5.41120 | -0.43300 | 0.27450  |
| C | -6.90520 | -0.32970 | -0.03910 |
| C | -7.74000 | -1.12620 | 0.96350  |
| C | -9.22540 | -1.02580 | 0.65560  |
| O | 4.51620  | -2.33890 | -1.74400 |
| C | 2.36630  | -2.64140 | 4.37770  |
| C | 1.96550  | -0.77440 | 2.76710  |
| C | 3.38700  | -2.28580 | -1.26820 |
| C | 2.12310  | -1.94860 | -2.06570 |
| N | 1.11120  | -1.35940 | -1.19930 |
| C | 0.77510  | -1.91710 | 0.01660  |
| C | 1.79060  | -2.98690 | 0.49800  |
| N | 3.14520  | -2.70330 | 0.02380  |
| C | 2.33330  | -0.92050 | -3.16740 |
| C | 0.99040  | -0.19310 | -3.25930 |
| C | 0.35820  | -0.30890 | -1.86180 |
| O | -0.27750 | -1.66310 | 0.59860  |
| C | 1.74140  | -3.22630 | 2.01540  |
| C | 2.47840  | -2.20550 | 2.91260  |
| H | -1.93090 | 3.34850  | 0.07400  |
| H | 3.42780  | 4.68610  | 1.78400  |
| H | 3.39430  | 1.44610  | -0.33890 |
| H | 0.86700  | 4.83270  | 1.48900  |
| H | -2.86440 | 2.06870  | -1.67620 |
| H | -2.14280 | 0.64890  | -2.36830 |
| H | -2.91450 | 0.65490  | 0.61750  |
| H | -1.83210 | -1.14240 | 0.01840  |
| H | -4.91520 | 1.41030  | -0.73180 |
| H | -4.75200 | -0.03920 | -1.73550 |
| H | -5.10920 | -1.48690 | 0.25830  |
| H | -5.22240 | -0.05740 | 1.28750  |
| H | -7.21320 | 0.72280  | -0.01910 |
| H | -7.09440 | -0.70260 | -1.05310 |
| H | -7.43930 | -2.18020 | 0.94460  |
| H | -7.55730 | -0.75470 | 1.97860  |
| H | -9.80340 | -1.60250 | 1.38460  |
| H | -9.56560 | 0.01380  | 0.69830  |
| H | -9.44690 | -1.41950 | -0.34150 |
| H | 2.92780  | -1.96390 | 5.02990  |
| H | 1.32320  | -2.64650 | 4.71210  |
| H | 2.77300  | -3.64870 | 4.51700  |
| H | 2.46200  | -0.10940 | 3.48230  |
| H | 2.17410  | -0.37900 | 1.77010  |

|   |          |          |          |
|---|----------|----------|----------|
| H | 0.88750  | -0.71530 | 2.94910  |
| H | 1.71030  | -2.88140 | -2.46940 |
| H | 1.48350  | -3.91610 | -0.00140 |
| H | 3.96540  | -3.02540 | 0.54130  |
| H | 2.60910  | -1.39030 | -4.11720 |
| H | 3.13340  | -0.21530 | -2.91940 |
| H | 0.35620  | -0.71980 | -3.98400 |
| H | 1.09980  | 0.83680  | -3.61390 |
| H | -0.64390 | -0.72310 | -1.98310 |
| H | 2.19300  | -4.21050 | 2.20380  |
| H | 0.69620  | -3.30860 | 2.34040  |
| H | 3.54460  | -2.21000 | 2.65520  |

Standard orientations of **2ad**

|   |          |          |          |
|---|----------|----------|----------|
| C | -0.97310 | 2.82440  | -0.18860 |
| C | 0.18810  | 3.37490  | 0.34090  |
| C | 1.41990  | 2.74290  | 0.15420  |
| C | 1.45870  | 1.53740  | -0.57630 |
| C | 0.28460  | 0.94230  | -1.10790 |
| C | -0.94830 | 1.61980  | -0.91880 |
| C | 2.62160  | 3.38180  | 0.74340  |
| O | 3.76680  | 2.70110  | 0.54160  |
| O | 2.61560  | 4.43010  | 1.36720  |
| O | 2.64810  | 0.88950  | -0.80330 |
| O | 0.02260  | 4.54890  | 1.02960  |
| C | -2.28780 | 1.13200  | -1.45210 |
| C | -3.08910 | 0.31020  | -0.42340 |
| O | -2.69060 | -1.05820 | -0.47650 |
| C | -4.59050 | 0.37040  | -0.74330 |
| C | -5.43430 | -0.39170 | 0.28520  |
| C | -6.92720 | -0.28100 | -0.03110 |
| C | -7.77030 | -1.03920 | 0.99390  |
| C | -9.25470 | -0.93130 | 0.68330  |
| O | 4.49800  | -2.38840 | -1.67150 |
| C | 3.23070  | -1.03400 | 2.70370  |
| C | 1.79360  | -2.08620 | 4.45520  |
| C | 3.36870  | -2.32800 | -1.19650 |
| C | 2.10070  | -2.03570 | -2.00430 |
| N | 1.08560  | -1.42350 | -1.15840 |
| C | 0.75270  | -1.93640 | 0.07650  |
| C | 1.78700  | -2.95800 | 0.61420  |
| N | 3.13560  | -2.68930 | 0.11300  |
| C | 2.30190  | -1.04630 | -3.14320 |
| C | 0.95790  | -0.32370 | -3.25290 |
| C | 0.33360  | -0.39190 | -1.84950 |
| O | -0.30900 | -1.67950 | 0.64060  |

|   |          |          |          |
|---|----------|----------|----------|
| C | 1.75570  | -3.07400 | 2.14650  |
| C | 1.91530  | -1.76760 | 2.96050  |
| H | -1.91470 | 3.34820  | -0.02670 |
| H | 4.44800  | 3.25180  | 0.99080  |
| H | 3.36990  | 1.37960  | -0.35660 |
| H | 0.89400  | 4.85780  | 1.35980  |
| H | -2.86160 | 2.02460  | -1.73780 |
| H | -2.15350 | 0.57770  | -2.38720 |
| H | -2.92570 | 0.67820  | 0.59670  |
| H | -1.86420 | -1.14890 | 0.05020  |
| H | -4.91850 | 1.41660  | -0.77350 |
| H | -4.77160 | -0.06280 | -1.73530 |
| H | -5.14390 | -1.44880 | 0.29910  |
| H | -5.24100 | 0.01060  | 1.28700  |
| H | -7.22360 | 0.77500  | -0.04130 |
| H | -7.12080 | -0.68060 | -1.03410 |
| H | -7.48130 | -2.09650 | 1.00500  |
| H | -7.58320 | -0.64090 | 1.99790  |
| H | -9.83870 | -1.48050 | 1.42850  |
| H | -9.58340 | 0.11280  | 0.69620  |
| H | -9.48080 | -1.35090 | -0.30220 |
| H | 3.34660  | -0.19050 | 3.39330  |
| H | 4.09080  | -1.69800 | 2.83860  |
| H | 3.26420  | -0.61920 | 1.69260  |
| H | 1.84670  | -1.17100 | 5.05460  |
| H | 0.83570  | -2.57000 | 4.67390  |
| H | 2.59580  | -2.75480 | 4.78560  |
| H | 1.69670  | -2.98700 | -2.37150 |
| H | 1.50370  | -3.92980 | 0.18860  |
| H | 3.96010  | -2.98100 | 0.64140  |
| H | 2.57280  | -1.54900 | -4.07740 |
| H | 3.10210  | -0.33100 | -2.92570 |
| H | 0.32070  | -0.87610 | -3.95560 |
| H | 1.06380  | 0.69350  | -3.64340 |
| H | -0.67200 | -0.80280 | -1.95080 |
| H | 2.52800  | -3.78840 | 2.46230  |
| H | 0.79280  | -3.52370 | 2.42550  |
| H | 1.09640  | -1.08340 | 2.71060  |

Standard orientations of **2ae**

|   |          |         |          |
|---|----------|---------|----------|
| C | -0.97370 | 2.81910 | -0.22120 |
| C | 0.18670  | 3.37770 | 0.30280  |
| C | 1.41680  | 2.74450 | 0.12220  |
| C | 1.45590  | 1.52940 | -0.59600 |
| C | 0.28340  | 0.92680 | -1.12050 |
| C | -0.94910 | 1.60590 | -0.93800 |

|   |          |          |          |
|---|----------|----------|----------|
| C | 2.68060  | 3.29940  | 0.66340  |
| O | 2.53670  | 4.46590  | 1.32340  |
| O | 3.77580  | 2.77610  | 0.54390  |
| O | 2.64960  | 0.88120  | -0.81460 |
| O | 0.01660  | 4.55650  | 0.97760  |
| C | -2.28880 | 1.11070  | -1.46370 |
| C | -3.08840 | 0.30150  | -0.42380 |
| O | -2.68650 | -1.06640 | -0.45680 |
| C | -4.58980 | 0.35350  | -0.74500 |
| C | -5.43220 | -0.39580 | 0.29400  |
| C | -6.92530 | -0.29330 | -0.02450 |
| C | -7.76690 | -1.03860 | 1.01100  |
| C | -9.25150 | -0.93890 | 0.69840  |
| O | 4.48740  | -2.44940 | -1.66810 |
| C | 3.26160  | -1.00160 | 2.69630  |
| C | 1.82560  | -2.01160 | 4.47330  |
| C | 3.36370  | -2.36380 | -1.18360 |
| C | 2.09350  | -2.06780 | -1.98590 |
| N | 1.08640  | -1.43880 | -1.14290 |
| C | 0.75780  | -1.93280 | 0.10080  |
| C | 1.79060  | -2.95050 | 0.64850  |
| N | 3.13710  | -2.69990 | 0.13350  |
| C | 2.29800  | -1.09060 | -3.13470 |
| C | 0.95680  | -0.36380 | -3.25040 |
| C | 0.33370  | -0.41580 | -1.84570 |
| O | -0.30060 | -1.66420 | 0.66590  |
| C | 1.76900  | -3.03990 | 2.18280  |
| C | 1.94210  | -1.72060 | 2.97260  |
| H | -1.91620 | 3.34310  | -0.06520 |
| H | 3.45310  | 4.68520  | 1.60810  |
| H | 3.38760  | 1.36340  | -0.38270 |
| H | 0.89540  | 4.85100  | 1.29690  |
| H | -2.86360 | 1.99920  | -1.76010 |
| H | -2.15530 | 0.54460  | -2.39180 |
| H | -2.92640 | 0.68460  | 0.59100  |
| H | -1.85790 | -1.14690 | 0.06820  |
| H | -4.92030 | 1.39820  | -0.79050 |
| H | -4.76940 | -0.09450 | -1.73070 |
| H | -5.13930 | -1.45190 | 0.32330  |
| H | -5.24030 | 0.02140  | 1.29000  |
| H | -7.22420 | 0.76170  | -0.05000 |
| H | -7.11750 | -0.70780 | -1.02160 |
| H | -7.47530 | -2.09500 | 1.03760  |
| H | -7.58120 | -0.62540 | 2.00930  |
| H | -9.83440 | -1.47870 | 1.45120  |
| H | -9.58270 | 0.10440  | 0.69610  |

|   |          |          |          |
|---|----------|----------|----------|
| H | -9.47620 | -1.37320 | -0.28100 |
| H | 3.38720  | -0.14670 | 3.37010  |
| H | 4.11740  | -1.66960 | 2.83890  |
| H | 3.29320  | -0.60530 | 1.67780  |
| H | 1.88870  | -1.08630 | 5.05600  |
| H | 0.86520  | -2.48410 | 4.70540  |
| H | 2.62450  | -2.68030 | 4.81160  |
| H | 1.67970  | -3.01890 | -2.34250 |
| H | 1.49840  | -3.92780 | 0.24190  |
| H | 3.96380  | -2.98770 | 0.66090  |
| H | 2.56660  | -1.60320 | -4.06410 |
| H | 3.10090  | -0.37630 | -2.92370 |
| H | 0.31660  | -0.92010 | -3.94720 |
| H | 1.06680  | 0.64920  | -3.65070 |
| H | -0.67150 | -0.82890 | -1.94170 |
| H | 2.53900  | -3.75350 | 2.50590  |
| H | 0.80530  | -3.47870 | 2.47600  |
| H | 1.12700  | -1.03480 | 2.71450  |

Standard orientations of **2af**

|   |          |          |          |
|---|----------|----------|----------|
| C | 1.50400  | 2.79870  | -0.79950 |
| C | 0.37250  | 3.58740  | -0.97110 |
| C | -0.83480 | 3.23480  | -0.36280 |
| C | -0.88200 | 2.06310  | 0.42100  |
| C | 0.25400  | 1.23070  | 0.59800  |
| C | 1.47070  | 1.62770  | -0.01700 |
| C | -2.00340 | 4.12170  | -0.58080 |
| O | -3.13240 | 3.71110  | 0.02920  |
| O | -1.98570 | 5.14250  | -1.24840 |
| O | -2.04190 | 1.68290  | 1.04990  |
| O | 0.54340  | 4.69990  | -1.75410 |
| C | 2.78190  | 0.86290  | 0.10010  |
| C | 3.01650  | -0.12170 | -1.06140 |
| O | 2.38650  | -1.37260 | -0.79220 |
| C | 4.51070  | -0.39460 | -1.29990 |
| C | 5.23610  | -1.01210 | -0.09770 |
| C | 6.70330  | -1.29930 | -0.42610 |
| C | 7.43120  | -1.91150 | 0.77040  |
| C | 8.88910  | -2.19840 | 0.44820  |
| O | -4.13740 | -1.04620 | 2.66980  |
| C | -3.83130 | -4.91680 | -1.32780 |
| C | -4.45030 | -3.56410 | -3.33990 |
| C | -3.22060 | -1.27900 | 1.88940  |
| C | -1.73400 | -1.26920 | 2.26020  |
| N | -0.93820 | -0.91640 | 1.09180  |
| C | -1.13460 | -1.51600 | -0.13540 |

|   |          |          |          |
|---|----------|----------|----------|
| C | -2.43130 | -2.37060 | -0.19740 |
| N | -3.47680 | -1.73930 | 0.61340  |
| C | -1.35360 | -0.24010 | 3.31440  |
| C | 0.07280  | 0.16700  | 2.93930  |
| C | 0.18200  | -0.05350 | 1.42100  |
| O | -0.30610 | -1.46270 | -1.04210 |
| C | -2.87510 | -2.57080 | -1.65300 |
| C | -4.08750 | -3.50380 | -1.85300 |
| H | 2.42870  | 3.10760  | -1.28570 |
| H | -3.79330 | 4.39870  | -0.21500 |
| H | -2.75120 | 2.32160  | 0.82740  |
| H | -0.30610 | 5.18830  | -1.81460 |
| H | 3.58850  | 1.60910  | 0.11440  |
| H | 2.84550  | 0.36200  | 1.07180  |
| H | 2.59700  | 0.26900  | -1.99670 |
| H | 1.43250  | -1.27960 | -1.01580 |
| H | 4.60380  | -1.08610 | -2.14750 |
| H | 5.00840  | 0.53880  | -1.58990 |
| H | 5.18730  | -0.33140 | 0.75970  |
| H | 4.74150  | -1.94440 | 0.19940  |
| H | 6.76150  | -1.98410 | -1.28090 |
| H | 7.20220  | -0.36860 | -0.72280 |
| H | 7.37980  | -1.22910 | 1.62680  |
| H | 6.93860  | -2.84430 | 1.06870  |
| H | 9.39040  | -2.63560 | 1.31740  |
| H | 8.97540  | -2.90390 | -0.38430 |
| H | 9.41900  | -1.27970 | 0.17690  |
| H | -4.67450 | -5.57640 | -1.56010 |
| H | -2.93070 | -5.34990 | -1.77590 |
| H | -3.70920 | -4.92150 | -0.24060 |
| H | -5.33550 | -4.18880 | -3.49960 |
| H | -4.67490 | -2.56430 | -3.72640 |
| H | -3.62960 | -3.98140 | -3.93340 |
| H | -1.44380 | -2.28070 | 2.56940  |
| H | -2.18710 | -3.32980 | 0.27330  |
| H | -4.46540 | -1.82920 | 0.37340  |
| H | -1.40660 | -0.65460 | 4.32640  |
| H | -2.01710 | 0.63060  | 3.29490  |
| H | 0.77350  | -0.50600 | 3.45010  |
| H | 0.31170  | 1.18630  | 3.25900  |
| H | 1.06470  | -0.66730 | 1.23550  |
| H | -2.03130 | -2.96500 | -2.23500 |
| H | -3.10960 | -1.58920 | -2.08770 |
| H | -4.95430 | -3.09320 | -1.32230 |

Standard orientations of **2ag**

|   |          |          |          |
|---|----------|----------|----------|
| C | 1.50150  | 2.80260  | -0.78010 |
| C | 0.37040  | 3.59340  | -0.94780 |
| C | -0.83440 | 3.23690  | -0.34100 |
| C | -0.88080 | 2.05940  | 0.43750  |
| C | 0.25380  | 1.22550  | 0.60940  |
| C | 1.46940  | 1.62640  | -0.00450 |
| C | -2.06580 | 4.04950  | -0.48810 |
| O | -1.91490 | 5.15370  | -1.24660 |
| O | -3.14200 | 3.77710  | 0.01690  |
| O | -2.04400 | 1.67810  | 1.06520  |
| O | 0.54430  | 4.70720  | -1.72460 |
| C | 2.78020  | 0.86020  | 0.10570  |
| C | 3.01280  | -0.11600 | -1.06340 |
| O | 2.37970  | -1.36730 | -0.80460 |
| C | 4.50640  | -0.39050 | -1.30380 |
| C | 5.23000  | -1.01910 | -0.10630 |
| C | 6.69650  | -1.30740 | -0.43680 |
| C | 7.42280  | -1.93060 | 0.75510  |
| C | 8.88000  | -2.21870 | 0.43090  |
| O | -4.12790 | -1.10730 | 2.69240  |
| C | -3.83220 | -4.90170 | -1.36980 |
| C | -4.46840 | -3.52060 | -3.35710 |
| C | -3.21560 | -1.31370 | 1.89940  |
| C | -1.72670 | -1.29340 | 2.25890  |
| N | -0.93920 | -0.92400 | 1.09000  |
| C | -1.13970 | -1.51070 | -0.14260 |
| C | -2.43430 | -2.36790 | -0.20900 |
| N | -3.47720 | -1.75430 | 0.61790  |
| C | -1.34950 | -0.26910 | 3.31890  |
| C | 0.07410  | 0.14720  | 2.94380  |
| C | 0.18130  | -0.06350 | 1.42400  |
| O | -0.31440 | -1.44620 | -1.05170 |
| C | -2.88670 | -2.54740 | -1.66480 |
| C | -4.09680 | -3.48180 | -1.87170 |
| H | 2.42640  | 3.11320  | -1.26500 |
| H | -2.80960 | 5.56410  | -1.23780 |
| H | -2.76890 | 2.30740  | 0.85970  |
| H | -0.31350 | 5.17950  | -1.77090 |
| H | 3.58730  | 1.60580  | 0.12450  |
| H | 2.84460  | 0.35200  | 1.07350  |
| H | 2.59450  | 0.28320  | -1.99570 |
| H | 1.42520  | -1.26930 | -1.02410 |
| H | 4.59800  | -1.07540 | -2.15670 |
| H | 5.00640  | 0.54410  | -1.58630 |
| H | 5.18290  | -0.34480 | 0.75640  |
| H | 4.73310  | -1.95230 | 0.18360  |

|   |          |          |          |
|---|----------|----------|----------|
| H | 6.75320  | -1.98570 | -1.29680 |
| H | 7.19780  | -0.37570 | -0.72620 |
| H | 7.37300  | -1.25470 | 1.61670  |
| H | 6.92780  | -2.86440 | 1.04610  |
| H | 9.38010  | -2.66380 | 1.29670  |
| H | 8.96460  | -2.91800 | -0.40700 |
| H | 9.41220  | -1.29930 | 0.16670  |
| H | -4.67440 | -5.56080 | -1.60710 |
| H | -2.93280 | -5.32450 | -1.83000 |
| H | -3.70350 | -4.92260 | -0.28360 |
| H | -5.35240 | -4.14620 | -3.52110 |
| H | -4.69910 | -2.51590 | -3.72690 |
| H | -3.64990 | -3.92570 | -3.96190 |
| H | -1.42550 | -2.30460 | 2.55830  |
| H | -2.18360 | -3.33350 | 0.24510  |
| H | -4.46720 | -1.84530 | 0.38380  |
| H | -1.39930 | -0.68960 | 4.32860  |
| H | -2.01730 | 0.59860  | 3.30460  |
| H | 0.77920  | -0.52530 | 3.44930  |
| H | 0.30840  | 1.16570  | 3.26940  |
| H | 1.06350  | -0.67670 | 1.23390  |
| H | -2.04510 | -2.92940 | -2.25820 |
| H | -3.12740 | -1.56010 | -2.08280 |
| H | -4.96180 | -3.08260 | -1.32960 |

Standard orientations of **2ah**

|   |          |          |          |
|---|----------|----------|----------|
| C | 1.84530  | -2.75430 | 0.16610  |
| C | 0.95540  | -3.37560 | 1.03410  |
| C | -0.41180 | -3.09690 | 0.96480  |
| C | -0.86670 | -2.17080 | 0.00320  |
| C | 0.02280  | -1.50910 | -0.88320 |
| C | 1.40350  | -1.82970 | -0.80090 |
| C | -1.30910 | -3.79750 | 1.91550  |
| O | -2.61030 | -3.46980 | 1.79390  |
| O | -0.94040 | -4.60630 | 2.75100  |
| O | -2.20250 | -1.87430 | -0.11220 |
| O | 1.51720  | -4.25490 | 1.92370  |
| C | 2.48010  | -1.23220 | -1.69590 |
| C | 3.17100  | -0.00040 | -1.07690 |
| O | 2.42040  | 1.17660  | -1.36620 |
| C | 4.57400  | 0.18000  | -1.67750 |
| C | 5.32600  | 1.42350  | -1.18460 |
| C | 5.61780  | 1.40210  | 0.31730  |
| C | 6.47890  | 2.59640  | 0.73080  |
| C | 6.76780  | 2.58440  | 2.22350  |
| O | -4.93140 | 0.51070  | -1.27500 |

|   |          |          |          |
|---|----------|----------|----------|
| C | -3.01080 | 5.24480  | 0.95080  |
| C | -2.58060 | 4.51610  | 3.30570  |
| C | -3.77110 | 0.86010  | -1.08680 |
| C | -2.61920 | 0.63050  | -2.07060 |
| N | -1.36230 | 0.52700  | -1.34090 |
| C | -1.00420 | 1.43790  | -0.36800 |
| C | -2.16700 | 2.38470  | 0.04050  |
| N | -3.43720 | 1.65470  | -0.00850 |
| C | -2.71600 | -0.66460 | -2.86330 |
| C | -1.25910 | -1.07950 | -3.07840 |
| C | -0.47780 | -0.48190 | -1.89590 |
| O | 0.14800  | 1.55190  | 0.04540  |
| C | -1.90590 | 2.99160  | 1.42600  |
| C | -2.93440 | 4.04270  | 1.89270  |
| H | 2.90370  | -2.99970 | 0.24710  |
| H | -3.05370 | -4.01340 | 2.48460  |
| H | -2.70130 | -2.37270 | 0.56860  |
| H | 0.81290  | -4.63950 | 2.48920  |
| H | 3.22490  | -2.02110 | -1.87130 |
| H | 2.07650  | -1.00630 | -2.68870 |
| H | 3.24840  | -0.10370 | 0.01090  |
| H | 1.68560  | 1.22810  | -0.71350 |
| H | 5.18030  | -0.71100 | -1.47360 |
| H | 4.48520  | 0.26530  | -2.76850 |
| H | 6.27470  | 1.48410  | -1.73270 |
| H | 4.76220  | 2.32880  | -1.43940 |
| H | 4.67950  | 1.42650  | 0.88260  |
| H | 6.13250  | 0.46990  | 0.57930  |
| H | 7.42740  | 2.58030  | 0.18150  |
| H | 5.96860  | 3.53100  | 0.47060  |
| H | 7.38490  | 3.44590  | 2.49700  |
| H | 5.84040  | 2.63310  | 2.80310  |
| H | 7.30600  | 1.67570  | 2.51160  |
| H | -3.68400 | 6.01030  | 1.35190  |
| H | -2.02580 | 5.70230  | 0.80980  |
| H | -3.39890 | 4.95760  | -0.03090 |
| H | -3.32260 | 5.23290  | 3.67330  |
| H | -2.55820 | 3.67310  | 4.00440  |
| H | -1.59940 | 5.00270  | 3.32870  |
| H | -2.54890 | 1.49940  | -2.73620 |
| H | -2.20870 | 3.16530  | -0.72770 |
| H | -4.21010 | 1.88580  | 0.61780  |
| H | -3.24410 | -0.52330 | -3.81190 |
| H | -3.25730 | -1.44160 | -2.31370 |
| H | -0.90080 | -0.62430 | -4.01080 |
| H | -1.14680 | -2.16330 | -3.18340 |

|   |          |         |          |
|---|----------|---------|----------|
| H | 0.36210  | 0.08290 | -2.30310 |
| H | -0.90830 | 3.45110 | 1.43480  |
| H | -1.87100 | 2.17930 | 2.16510  |
| H | -3.92810 | 3.58270 | 1.94220  |

Standard orientations of **2ba**

|   |          |          |          |
|---|----------|----------|----------|
| C | 2.15890  | -2.62200 | -0.28690 |
| C | 1.56820  | -3.18610 | 0.83820  |
| C | 0.21010  | -2.99410 | 1.09070  |
| C | -0.54610 | -2.22160 | 0.18240  |
| C | 0.03580  | -1.62300 | -0.96550 |
| C | 1.42070  | -1.83670 | -1.19620 |
| C | -0.46460 | -3.57440 | 2.27660  |
| O | 0.34370  | -4.29900 | 3.07590  |
| O | -1.64640 | -3.43200 | 2.54210  |
| O | -1.89310 | -2.02460 | 0.38160  |
| O | 2.40670  | -3.91750 | 1.63580  |
| C | 2.19150  | -1.28110 | -2.38590 |
| C | 2.81750  | 0.12270  | -2.22610 |
| O | 1.83880  | 1.13770  | -2.43260 |
| C | 3.56520  | 0.35260  | -0.90620 |
| C | 4.28570  | 1.70590  | -0.87970 |
| C | 5.04920  | 1.90080  | 0.43180  |
| C | 5.76760  | 3.24950  | 0.46170  |
| C | 6.52710  | 3.44720  | 1.76380  |
| O | -5.06570 | 0.01110  | -0.37650 |
| C | -3.12620 | 5.10310  | 0.75420  |
| C | -2.09160 | 4.73030  | 3.00190  |
| C | -3.92720 | 0.44610  | -0.51140 |
| C | -3.01610 | 0.14920  | -1.70670 |
| N | -1.61900 | 0.22930  | -1.30020 |
| C | -1.13350 | 1.28760  | -0.55930 |
| C | -2.25340 | 2.20460  | 0.00650  |
| N | -3.42610 | 1.39760  | 0.35330  |
| C | -3.17390 | -1.25090 | -2.28060 |
| C | -1.77750 | -1.60200 | -2.79640 |
| C | -0.79750 | -0.78750 | -1.93360 |
| O | 0.06670  | 1.53540  | -0.45750 |
| C | -1.73460 | 3.00970  | 1.20620  |
| C | -2.71960 | 4.04760  | 1.78310  |
| H | 3.22130  | -2.79810 | -0.45250 |
| H | -0.25480 | -4.60100 | 3.79670  |
| H | -2.18530 | -2.45530 | 1.21400  |
| H | 1.88320  | -4.25770 | 2.39160  |
| H | 3.00570  | -1.98450 | -2.61100 |
| H | 1.55400  | -1.31100 | -3.27750 |

|   |          |          |          |
|---|----------|----------|----------|
| H | 3.53100  | 0.24100  | -3.05090 |
| H | 1.33910  | 1.25350  | -1.59260 |
| H | 2.86010  | 0.32890  | -0.06670 |
| H | 4.29710  | -0.44930 | -0.75460 |
| H | 4.98400  | 1.76610  | -1.72320 |
| H | 3.55950  | 2.51840  | -1.00100 |
| H | 4.35160  | 1.83740  | 1.27590  |
| H | 5.78010  | 1.09230  | 0.55530  |
| H | 6.46940  | 3.31640  | -0.37780 |
| H | 5.04070  | 4.06140  | 0.34260  |
| H | 7.03310  | 4.41770  | 1.76380  |
| H | 5.84840  | 3.41800  | 2.62220  |
| H | 7.28500  | 2.66890  | 1.89800  |
| H | -3.75590 | 5.87210  | 1.21470  |
| H | -2.24870 | 5.59820  | 0.32490  |
| H | -3.70410 | 4.66100  | -0.06290 |
| H | -2.79120 | 5.44220  | 3.45280  |
| H | -1.82770 | 3.99330  | 3.76780  |
| H | -1.18240 | 5.27630  | 2.72800  |
| H | -3.18490 | 0.91470  | -2.47380 |
| H | -2.54580 | 2.86960  | -0.81420 |
| H | -4.05090 | 1.66310  | 1.11640  |
| H | -3.92350 | -1.28270 | -3.07800 |
| H | -3.49190 | -1.97130 | -1.51970 |
| H | -1.69720 | -1.27000 | -3.83970 |
| H | -1.58960 | -2.68040 | -2.78540 |
| H | -0.14500 | -0.23890 | -2.61280 |
| H | -0.81010 | 3.52810  | 0.91840  |
| H | -1.45220 | 2.30920  | 2.00430  |
| H | -3.62660 | 3.53690  | 2.12670  |

Standard orientations of **2bb**

|   |          |          |          |
|---|----------|----------|----------|
| C | -1.21300 | 2.87630  | -0.59000 |
| C | -0.49530 | 3.30720  | 0.52010  |
| C | 0.74230  | 2.73940  | 0.82080  |
| C | 1.24690  | 1.72690  | -0.02400 |
| C | 0.52540  | 1.25560  | -1.15170 |
| C | -0.73060 | 1.85440  | -1.43380 |
| C | 1.54290  | 3.16080  | 1.99520  |
| O | 0.97750  | 4.13920  | 2.73010  |
| O | 2.62370  | 2.68790  | 2.30450  |
| O | 2.47410  | 1.15560  | 0.22270  |
| O | -1.08960 | 4.29830  | 1.25380  |
| C | -1.61860 | 1.48110  | -2.61300 |
| C | -2.63690 | 0.33900  | -2.39630 |
| O | -2.00770 | -0.93020 | -2.55220 |

|   |          |          |          |
|---|----------|----------|----------|
| C | -3.41120 | 0.40110  | -1.07300 |
| C | -4.49760 | -0.67750 | -0.98810 |
| C | -5.27190 | -0.58000 | 0.32800  |
| C | -6.35430 | -1.65530 | 0.41700  |
| C | -7.12520 | -1.56250 | 1.72410  |
| O | 4.88980  | -1.84770 | -0.33030 |
| C | 0.16490  | -3.48990 | 3.81460  |
| C | 0.34310  | -1.31980 | 2.59070  |
| C | 3.67110  | -1.90460 | -0.45630 |
| C | 2.89990  | -1.40720 | -1.68340 |
| N | 1.54230  | -1.02550 | -1.31710 |
| C | 0.73970  | -1.83950 | -0.54520 |
| C | 1.52160  | -2.98270 | 0.15350  |
| N | 2.89920  | -2.59460 | 0.45470  |
| C | 3.49130  | -0.16380 | -2.33070 |
| C | 2.27960  | 0.56720  | -2.91130 |
| C | 1.08180  | 0.14690  | -2.04120 |
| O | -0.48390 | -1.72840 | -0.50600 |
| C | 0.79230  | -3.54850 | 1.38250  |
| C | 0.89620  | -2.73960 | 2.69590  |
| H | -2.17370 | 3.34770  | -0.79520 |
| H | 1.62860  | 4.29130  | 3.45260  |
| H | 2.86900  | 1.52670  | 1.04130  |
| H | -0.49720 | 4.51440  | 2.00440  |
| H | -2.18400 | 2.37990  | -2.89800 |
| H | -0.99140 | 1.26790  | -3.48670 |
| H | -3.35790 | 0.40340  | -3.22060 |
| H | -1.57520 | -1.16010 | -1.69850 |
| H | -2.72510 | 0.25590  | -0.22980 |
| H | -3.87380 | 1.38900  | -0.96460 |
| H | -5.19040 | -0.56730 | -1.83100 |
| H | -4.04380 | -1.67240 | -1.06880 |
| H | -4.57820 | -0.68650 | 1.17090  |
| H | -5.73180 | 0.41220  | 0.41130  |
| H | -7.05320 | -1.55070 | -0.42100 |
| H | -5.89920 | -2.64950 | 0.33800  |
| H | -7.89400 | -2.34040 | 1.76690  |
| H | -6.45920 | -1.69550 | 2.58270  |
| H | -7.61970 | -0.59050 | 1.81980  |
| H | 0.27020  | -2.96460 | 4.76980  |
| H | -0.90430 | -3.58500 | 3.59620  |
| H | 0.57650  | -4.49670 | 3.94270  |
| H | 0.36290  | -0.82230 | 3.56660  |
| H | 0.94500  | -0.71010 | 1.91270  |
| H | -0.69290 | -1.31920 | 2.23670  |
| H | 2.82860  | -2.23150 | -2.40380 |

|   |          |          |          |
|---|----------|----------|----------|
| H | 1.58960  | -3.78190 | -0.59750 |
| H | 3.41040  | -3.01750 | 1.23190  |
| H | 4.22470  | -0.41580 | -3.10370 |
| H | 4.00680  | 0.47010  | -1.60170 |
| H | 2.11770  | 0.21380  | -3.93790 |
| H | 2.43350  | 1.64980  | -2.96320 |
| H | 0.30560  | -0.22100 | -2.71230 |
| H | 1.21280  | -4.54470 | 1.57950  |
| H | -0.26530 | -3.71200 | 1.13860  |
| H | 1.95080  | -2.67060 | 2.98920  |

Standard orientations of **2bc**

|   |          |          |          |
|---|----------|----------|----------|
| C | 2.12960  | -2.65330 | -0.27260 |
| C | 1.52510  | -3.20710 | 0.84960  |
| C | 0.16720  | -2.99640 | 1.09770  |
| C | -0.57370 | -2.21530 | 0.18700  |
| C | 0.02260  | -1.62670 | -0.95970 |
| C | 1.40560  | -1.85970 | -1.18540 |
| C | -0.41820 | -3.61600 | 2.31140  |
| O | -1.72920 | -3.35990 | 2.48740  |
| O | 0.19990  | -4.30350 | 3.10730  |
| O | -1.91620 | -1.99750 | 0.37740  |
| O | 2.34810  | -3.95160 | 1.65490  |
| C | 2.18820  | -1.31740 | -2.37360 |
| C | 2.83260  | 0.07820  | -2.21550 |
| O | 1.86890  | 1.10550  | -2.43190 |
| C | 3.57580  | 0.30300  | -0.89220 |
| C | 4.31430  | 1.64650  | -0.86650 |
| C | 5.07280  | 1.83610  | 0.44870  |
| C | 5.80910  | 3.17510  | 0.47770  |
| C | 6.56370  | 3.36750  | 1.78350  |
| O | -5.04290 | 0.04650  | -0.35770 |
| C | -3.07010 | 5.14360  | 0.72200  |
| C | -2.03070 | 4.78000  | 2.96900  |
| C | -3.90590 | 0.48120  | -0.50630 |
| C | -3.00460 | 0.17810  | -1.70780 |
| N | -1.60560 | 0.24710  | -1.30550 |
| C | -1.10880 | 1.30380  | -0.56960 |
| C | -2.21980 | 2.23380  | -0.00720 |
| N | -3.39630 | 1.43640  | 0.34990  |
| C | -3.17610 | -1.21970 | -2.28380 |
| C | -1.78270 | -1.58460 | -2.79850 |
| C | -0.79500 | -0.78160 | -1.93370 |
| O | 0.09360  | 1.53970  | -0.46850 |
| C | -1.69130 | 3.04410  | 1.18470  |
| C | -2.66730 | 4.09280  | 1.75720  |

|   |          |          |          |
|---|----------|----------|----------|
| H | 3.19010  | -2.84490 | -0.43280 |
| H | -1.95040 | -3.83510 | 3.32070  |
| H | -2.19570 | -2.42840 | 1.21210  |
| H | 1.83280  | -4.29600 | 2.41640  |
| H | 2.99380  | -2.03240 | -2.59380 |
| H | 1.55380  | -1.34140 | -3.26760 |
| H | 3.55250  | 0.18350  | -3.03660 |
| H | 1.36840  | 1.23390  | -1.59430 |
| H | 2.86560  | 0.29190  | -0.05660 |
| H | 4.29590  | -0.50820 | -0.73330 |
| H | 5.01820  | 1.69400  | -1.70620 |
| H | 3.59990  | 2.46830  | -0.99510 |
| H | 4.36950  | 1.78530  | 1.28890  |
| H | 5.79200  | 1.01830  | 0.57950  |
| H | 6.51660  | 3.22930  | -0.35790 |
| H | 5.09400  | 3.99630  | 0.35140  |
| H | 7.08280  | 4.33110  | 1.78280  |
| H | 5.87970  | 3.35070  | 2.63800  |
| H | 7.31030  | 2.57950  | 1.92500  |
| H | -3.69310 | 5.92020  | 1.17900  |
| H | -2.19070 | 5.62960  | 0.28630  |
| H | -3.65370 | 4.69960  | -0.08990 |
| H | -2.72390 | 5.50000  | 3.41690  |
| H | -1.76930 | 4.04680  | 3.73940  |
| H | -1.11860 | 5.31780  | 2.68820  |
| H | -3.17080 | 0.94630  | -2.47280 |
| H | -2.51060 | 2.89470  | -0.83190 |
| H | -4.01560 | 1.71100  | 1.11410  |
| H | -3.92470 | -1.24210 | -3.08250 |
| H | -3.50320 | -1.93810 | -1.52510 |
| H | -1.69810 | -1.25160 | -3.84120 |
| H | -1.60600 | -2.66490 | -2.78910 |
| H | -0.13220 | -0.24360 | -2.61120 |
| H | -0.76430 | 3.55400  | 0.88980  |
| H | -1.41080 | 2.34770  | 1.98700  |
| H | -3.57660 | 3.59090  | 2.10740  |

Standard orientations of **2bd**

|   |          |         |          |
|---|----------|---------|----------|
| C | -1.19180 | 2.85790 | -0.65350 |
| C | -0.45620 | 3.29840 | 0.44050  |
| C | 0.77550  | 2.71560 | 0.74500  |
| C | 1.25580  | 1.67900 | -0.08130 |
| C | 0.51600  | 1.19850 | -1.19470 |
| C | -0.73340 | 1.81090 | -1.47880 |
| C | 1.51000  | 3.22790 | 1.92710  |
| O | 2.67710  | 2.59980 | 2.16970  |

|   |          |          |          |
|---|----------|----------|----------|
| O | 1.12330  | 4.13440  | 2.64590  |
| O | 2.47350  | 1.09280  | 0.16310  |
| O | -1.02460 | 4.31690  | 1.16110  |
| C | -1.63830 | 1.42480  | -2.64090 |
| C | -2.67130 | 0.30320  | -2.38850 |
| O | -2.06300 | -0.97890 | -2.52110 |
| C | -3.43210 | 0.40700  | -1.06010 |
| C | -4.53430 | -0.65220 | -0.94120 |
| C | -5.29480 | -0.51320 | 0.37920  |
| C | -6.39280 | -1.56920 | 0.50220  |
| C | -7.14990 | -1.43520 | 1.81380  |
| O | 4.85670  | -1.89000 | -0.33070 |
| C | 1.57190  | -1.54990 | 3.09330  |
| C | -0.37980 | -2.97970 | 3.71600  |
| C | 3.63660  | -1.94670 | -0.44370 |
| C | 2.85630  | -1.49500 | -1.68200 |
| N | 1.50430  | -1.09420 | -1.31710 |
| C | 0.70330  | -1.87300 | -0.51020 |
| C | 1.48410  | -2.97780 | 0.24610  |
| N | 2.87130  | -2.59070 | 0.50450  |
| C | 3.44740  | -0.27770 | -2.37850 |
| C | 2.23370  | 0.44490  | -2.96520 |
| C | 1.04520  | 0.06190  | -2.06670 |
| O | -0.52060 | -1.76190 | -0.47700 |
| C | 0.76500  | -3.43150 | 1.52670  |
| C | 0.38000  | -2.33650 | 2.55010  |
| H | -2.14620 | 3.34130  | -0.85960 |
| H | 3.02350  | 3.05250  | 2.97240  |
| H | 2.86060  | 1.48410  | 0.97410  |
| H | -0.43330 | 4.55660  | 1.90730  |
| H | -2.19300 | 2.32530  | -2.94080 |
| H | -1.02280 | 1.18220  | -3.51530 |
| H | -3.39910 | 0.35970  | -3.20740 |
| H | -1.62530 | -1.19690 | -1.66710 |
| H | -2.74040 | 0.26980  | -0.22020 |
| H | -3.87830 | 1.40430  | -0.96970 |
| H | -5.23320 | -0.54990 | -1.78010 |
| H | -4.09690 | -1.65570 | -1.00370 |
| H | -4.59500 | -0.61170 | 1.21810  |
| H | -5.73850 | 0.48770  | 0.44440  |
| H | -7.09780 | -1.47230 | -0.33160 |
| H | -5.95390 | -2.57190 | 0.44130  |
| H | -7.93010 | -2.19980 | 1.88080  |
| H | -6.47800 | -1.55950 | 2.66900  |
| H | -7.62840 | -0.45380 | 1.89210  |
| H | 1.25940  | -0.87890 | 3.90110  |

|   |          |          |          |
|---|----------|----------|----------|
| H | 2.34270  | -2.21790 | 3.49140  |
| H | 2.01990  | -0.92120 | 2.31900  |
| H | -0.71410 | -2.21960 | 4.43020  |
| H | -1.26830 | -3.51000 | 3.35690  |
| H | 0.25030  | -3.69640 | 4.25370  |
| H | 2.77550  | -2.34560 | -2.36990 |
| H | 1.54070  | -3.83370 | -0.43960 |
| H | 3.38830  | -2.98370 | 1.29330  |
| H | 4.16740  | -0.56100 | -3.15330 |
| H | 3.97840  | 0.37590  | -1.67850 |
| H | 2.05510  | 0.06100  | -3.97800 |
| H | 2.39510  | 1.52410  | -3.05280 |
| H | 0.25420  | -0.31450 | -2.71500 |
| H | 1.38210  | -4.18890 | 2.02870  |
| H | -0.15900 | -3.94340 | 1.22460  |
| H | -0.30400 | -1.62290 | 2.07660  |

Standard orientations of **2be**

|   |          |          |          |
|---|----------|----------|----------|
| C | -1.21320 | 2.83530  | -0.69030 |
| C | -0.48530 | 3.29620  | 0.40110  |
| C | 0.74930  | 2.72830  | 0.71370  |
| C | 1.24130  | 1.68530  | -0.10080 |
| C | 0.50980  | 1.18450  | -1.20960 |
| C | -0.74400 | 1.78240  | -1.50270 |
| C | 1.55960  | 3.18040  | 1.86990  |
| O | 1.00750  | 4.18850  | 2.57420  |
| O | 2.63710  | 2.70710  | 2.19010  |
| O | 2.46640  | 1.11420  | 0.15640  |
| O | -1.06750 | 4.31550  | 1.10550  |
| C | -1.64360 | 1.37380  | -2.66120 |
| C | -2.66730 | 0.24670  | -2.39580 |
| O | -2.04720 | -1.03170 | -2.50640 |
| C | -3.43410 | 0.36390  | -1.07190 |
| C | -4.52770 | -0.70290 | -0.94140 |
| C | -5.29470 | -0.55070 | 0.37380  |
| C | -6.38410 | -1.61410 | 0.50830  |
| C | -7.14770 | -1.46690 | 1.81470  |
| O | 4.88050  | -1.89250 | -0.33180 |
| C | 1.61450  | -1.49790 | 3.11340  |
| C | -0.33510 | -2.91790 | 3.76470  |
| C | 3.65900  | -1.94320 | -0.43150 |
| C | 2.87020  | -1.50100 | -1.66750 |
| N | 1.51850  | -1.10080 | -1.30130 |
| C | 0.72380  | -1.87280 | -0.48180 |
| C | 1.51140  | -2.96470 | 0.28600  |
| N | 2.89960  | -2.57320 | 0.53040  |

|   |          |          |          |
|---|----------|----------|----------|
| C | 3.45520  | -0.28620 | -2.37340 |
| C | 2.23790  | 0.42470  | -2.96680 |
| C | 1.05120  | 0.04210  | -2.06570 |
| O | -0.50070 | -1.76690 | -0.44640 |
| C | 0.80030  | -3.40090 | 1.57710  |
| C | 0.41980  | -2.29140 | 2.58650  |
| H | -2.17170 | 3.30690  | -0.90490 |
| H | 1.66360  | 4.35840  | 3.28810  |
| H | 2.86860  | 1.50790  | 0.96070  |
| H | -0.46850 | 4.55190  | 1.84470  |
| H | -2.20530 | 2.26570  | -2.97370 |
| H | -1.02450 | 1.12500  | -3.53130 |
| H | -3.39240 | 0.28440  | -3.21810 |
| H | -1.60760 | -1.23100 | -1.64870 |
| H | -2.74460 | 0.24520  | -0.22740 |
| H | -3.88920 | 1.35850  | -0.99810 |
| H | -5.22400 | -0.61930 | -1.78450 |
| H | -4.08140 | -1.70340 | -0.98700 |
| H | -4.59750 | -0.63040 | 1.21690  |
| H | -5.74720 | 0.44730  | 0.42210  |
| H | -7.08650 | -1.53590 | -0.32960 |
| H | -5.93640 | -2.61380 | 0.46430  |
| H | -7.92160 | -2.23710 | 1.89020  |
| H | -6.47830 | -1.57250 | 2.67440  |
| H | -7.63490 | -0.48860 | 1.87630  |
| H | 1.30570  | -0.81540 | 3.91300  |
| H | 2.38660  | -2.16060 | 3.51770  |
| H | 2.05950  | -0.88050 | 2.32840  |
| H | -0.66580 | -2.14770 | 4.46970  |
| H | -1.22530 | -3.45270 | 3.41700  |
| H | 0.29710  | -3.62730 | 4.30960  |
| H | 2.78870  | -2.35580 | -2.35010 |
| H | 1.56500  | -3.83040 | -0.38750 |
| H | 3.42220  | -2.95430 | 1.32150  |
| H | 4.17790  | -0.57140 | -3.14500 |
| H | 3.98110  | 0.37590  | -1.67750 |
| H | 2.06200  | 0.03190  | -3.97660 |
| H | 2.39340  | 1.50410  | -3.06270 |
| H | 0.26500  | -0.34940 | -2.71110 |
| H | 1.42100  | -4.15030 | 2.08650  |
| H | -0.12490 | -3.91800 | 1.28760  |
| H | -0.26600 | -1.58430 | 2.10600  |

Standard orientations of **2bf**

|   |         |          |          |
|---|---------|----------|----------|
| C | 3.08590 | -1.44510 | -0.38620 |
| C | 2.81240 | -2.13710 | 0.78760  |

|   |          |          |          |
|---|----------|----------|----------|
| C | 1.50160  | -2.49700 | 1.10690  |
| C | 0.46730  | -2.14680 | 0.21450  |
| C | 0.71780  | -1.42830 | -0.98470 |
| C | 2.06150  | -1.07650 | -1.28200 |
| C | 1.27630  | -3.23510 | 2.37340  |
| O | -0.01370 | -3.53840 | 2.61650  |
| O | 2.15550  | -3.55750 | 3.15520  |
| O | -0.83480 | -2.49640 | 0.47570  |
| O | 3.90160  | -2.42520 | 1.56890  |
| C | 2.49940  | -0.32040 | -2.52920 |
| C | 2.49950  | 1.22330  | -2.45310 |
| O | 1.18810  | 1.73720  | -2.67190 |
| C | 3.10210  | 1.80950  | -1.16860 |
| C | 3.19050  | 3.33990  | -1.22050 |
| C | 3.89810  | 3.94640  | -0.00480 |
| C | 3.13370  | 3.74660  | 1.30480  |
| C | 3.81230  | 4.46930  | 2.45840  |
| O | -4.55150 | -1.97680 | -0.13440 |
| C | -4.84550 | 3.53170  | 0.64770  |
| C | -3.65290 | 3.76130  | 2.83560  |
| C | -3.70740 | -1.11840 | -0.36800 |
| C | -2.81290 | -1.08820 | -1.61180 |
| N | -1.55540 | -0.42130 | -1.29920 |
| C | -1.51630 | 0.78760  | -0.63450 |
| C | -2.88930 | 1.20190  | -0.03560 |
| N | -3.60830 | 0.00950  | 0.42120  |
| C | -2.40890 | -2.46130 | -2.12770 |
| C | -1.01220 | -2.24440 | -2.71220 |
| C | -0.41540 | -1.05600 | -1.93780 |
| O | -0.52070 | 1.50870  | -0.61910 |
| C | -2.69680 | 2.22470  | 1.09290  |
| C | -3.99600 | 2.80400  | 1.69020  |
| H | 4.12210  | -1.18560 | -0.60060 |
| H | 0.01640  | -4.01530 | 3.47720  |
| H | -0.87590 | -2.95760 | 1.33950  |
| H | 3.60750  | -2.91000 | 2.37040  |
| H | 3.52360  | -0.64080 | -2.76790 |
| H | 1.90390  | -0.65710 | -3.38600 |
| H | 3.09180  | 1.57780  | -3.30570 |
| H | 0.70250  | 1.69950  | -1.81670 |
| H | 2.47850  | 1.52840  | -0.31320 |
| H | 4.10380  | 1.39390  | -1.00990 |
| H | 3.74330  | 3.63540  | -2.12070 |
| H | 2.18690  | 3.77270  | -1.30890 |
| H | 4.90510  | 3.52120  | 0.08510  |
| H | 4.02470  | 5.02120  | -0.18510 |

|   |          |          |          |
|---|----------|----------|----------|
| H | 2.10870  | 4.12050  | 1.19960  |
| H | 3.06930  | 2.68120  | 1.55020  |
| H | 3.25320  | 4.31080  | 3.38600  |
| H | 4.83130  | 4.09850  | 2.60810  |
| H | 3.86190  | 5.54680  | 2.27210  |
| H | -5.71560 | 4.00400  | 1.11670  |
| H | -4.26940 | 4.31350  | 0.14130  |
| H | -5.22460 | 2.84000  | -0.11040 |
| H | -4.56340 | 4.15250  | 3.30190  |
| H | -3.07590 | 3.24800  | 3.61210  |
| H | -3.06210 | 4.61230  | 2.47980  |
| H | -3.31670 | -0.50340 | -2.39110 |
| H | -3.46470 | 1.63420  | -0.86220 |
| H | -4.25340 | 0.04530  | 1.21220  |
| H | -3.11130 | -2.83700 | -2.87890 |
| H | -2.37630 | -3.20690 | -1.32650 |
| H | -1.11600 | -1.96690 | -3.76920 |
| H | -0.40070 | -3.15170 | -2.67510 |
| H | -0.06440 | -0.33220 | -2.67320 |
| H | -2.08140 | 3.05610  | 0.72330  |
| H | -2.11660 | 1.75450  | 1.89880  |
| H | -4.59620 | 1.99050  | 2.11380  |

Standard orientations of **2bg**

|   |          |          |          |
|---|----------|----------|----------|
| C | -0.44900 | -3.25000 | 0.58210  |
| C | 0.31300  | -3.57220 | -0.53480 |
| C | 1.39600  | -2.77290 | -0.90600 |
| C | 1.69970  | -1.63920 | -0.12440 |
| C | 0.92970  | -1.28050 | 1.01380  |
| C | -0.16610 | -2.11310 | 1.36620  |
| C | 2.16950  | -3.17110 | -2.10720 |
| O | 3.19130  | -2.34580 | -2.40750 |
| O | 1.93270  | -4.15250 | -2.79200 |
| O | 2.76680  | -0.83410 | -0.43830 |
| O | -0.07700 | -4.70100 | -1.20820 |
| C | -1.07890 | -1.87770 | 2.56210  |
| C | -2.31420 | -0.97610 | 2.33940  |
| O | -1.95040 | 0.40030  | 2.40660  |
| C | -3.10550 | -1.26450 | 1.05680  |
| C | -4.38890 | -0.42990 | 0.97020  |
| C | -5.17300 | -0.75100 | -0.30370 |
| C | -6.45050 | 0.08300  | -0.39510 |
| C | -7.23190 | -0.23190 | -1.66060 |
| O | 4.53330  | 2.51100  | -0.15410 |
| C | -2.05870 | 4.16180  | -2.61050 |
| C | -1.08370 | 5.43420  | -0.69160 |

|   |          |          |          |
|---|----------|----------|----------|
| C | 3.33420  | 2.37020  | 0.06000  |
| C | 2.73650  | 1.81670  | 1.35790  |
| N | 1.46280  | 1.16840  | 1.07370  |
| C | 0.49280  | 1.76980  | 0.29680  |
| C | 0.99210  | 3.05450  | -0.42170 |
| N | 2.39410  | 2.86740  | -0.82040 |
| C | 3.58020  | 0.74370  | 2.03000  |
| C | 2.55450  | -0.18170 | 2.68660  |
| C | 1.27230  | -0.04720 | 1.84630  |
| O | -0.67190 | 1.37820  | 0.27090  |
| C | 0.13560  | 3.40530  | -1.64640 |
| C | -1.23010 | 4.05010  | -1.32710 |
| H | -1.28350 | -3.90110 | 0.84030  |
| H | 3.58760  | -2.74830 | -3.21380 |
| H | 3.19250  | -1.16960 | -1.25490 |
| H | 0.51720  | -4.84230 | -1.97690 |
| H | -1.44090 | -2.85890 | 2.90070  |
| H | -0.48460 | -1.50340 | 3.40410  |
| H | -2.97810 | -1.13870 | 3.19750  |
| H | -1.59850 | 0.66190  | 1.52540  |
| H | -2.49230 | -1.03210 | 0.17770  |
| H | -3.36280 | -2.32940 | 1.01580  |
| H | -5.01590 | -0.62940 | 1.84760  |
| H | -4.14180 | 0.63830  | 0.98400  |
| H | -4.54400 | -0.55640 | -1.18100 |
| H | -5.42830 | -1.81760 | -0.31930 |
| H | -7.08530 | -0.11110 | 0.47730  |
| H | -6.20020 | 1.15030  | -0.38340 |
| H | -8.14130 | 0.37540  | -1.70560 |
| H | -6.63570 | -0.01760 | -2.55330 |
| H | -7.52570 | -1.28610 | -1.68820 |
| H | -3.04420 | 4.59150  | -2.40170 |
| H | -1.56160 | 4.79740  | -3.35120 |
| H | -2.21530 | 3.17520  | -3.05930 |
| H | -2.06480 | 5.90000  | -0.54740 |
| H | -0.60800 | 5.37620  | 0.29150  |
| H | -0.48480 | 6.09990  | -1.32220 |
| H | 2.54130  | 2.65380  | 2.03920  |
| H | 0.99230  | 3.86440  | 0.31480  |
| H | 2.77070  | 3.31940  | -1.65600 |
| H | 4.27240  | 1.17020  | 2.76340  |
| H | 4.18890  | 0.18890  | 1.30850  |
| H | 2.35630  | 0.18310  | 3.70280  |
| H | 2.92060  | -1.20930 | 2.77810  |
| H | 0.45680  | 0.17990  | 2.53270  |
| H | -0.02460 | 2.49350  | -2.23780 |

|   |          |         |          |
|---|----------|---------|----------|
| H | 0.69470  | 4.09140 | -2.29740 |
| H | -1.78760 | 3.41420 | -0.63120 |

Standard orientations of **2bh**

|   |          |          |          |
|---|----------|----------|----------|
| C | 3.08730  | -1.42610 | -0.40110 |
| C | 2.82620  | -2.11750 | 0.77650  |
| C | 1.52080  | -2.48470 | 1.10180  |
| C | 0.47850  | -2.14320 | 0.21250  |
| C | 0.71640  | -1.42570 | -0.98880 |
| C | 2.05600  | -1.06550 | -1.29280 |
| C | 1.19210  | -3.22130 | 2.34580  |
| O | 2.25780  | -3.50400 | 3.12150  |
| O | 0.06800  | -3.56050 | 2.67560  |
| O | -0.82100 | -2.50380 | 0.48440  |
| O | 3.92210  | -2.39360 | 1.54910  |
| C | 2.48240  | -0.30740 | -2.54270 |
| C | 2.47300  | 1.23630  | -2.46720 |
| O | 1.15660  | 1.74180  | -2.67530 |
| C | 3.08210  | 1.82670  | -1.18770 |
| C | 3.16040  | 3.35760  | -1.24080 |
| C | 3.87410  | 3.96900  | -0.03120 |
| C | 3.12180  | 3.76480  | 1.28470  |
| C | 3.80530  | 4.49210  | 2.43260  |
| O | -4.57390 | -1.98820 | -0.14680 |
| C | -4.85690 | 3.50830  | 0.67760  |
| C | -3.66350 | 3.72390  | 2.86650  |
| C | -3.72220 | -1.13430 | -0.36850 |
| C | -2.82090 | -1.10250 | -1.60690 |
| N | -1.56500 | -0.43390 | -1.29160 |
| C | -1.52860 | 0.77310  | -0.62360 |
| C | -2.90140 | 1.18250  | -0.02120 |
| N | -3.62140 | -0.01180 | 0.42780  |
| C | -2.41250 | -2.47580 | -2.11870 |
| C | -1.01730 | -2.25560 | -2.70550 |
| C | -0.42450 | -1.06230 | -1.93540 |
| O | -0.53500 | 1.49750  | -0.60900 |
| C | -2.70840 | 2.19800  | 1.11380  |
| C | -4.00720 | 2.77390  | 1.71520  |
| H | 4.12040  | -1.15940 | -0.62220 |
| H | 1.86570  | -3.98280 | 3.88700  |
| H | -0.87700 | -2.96810 | 1.34750  |
| H | 3.61540  | -2.87470 | 2.34630  |
| H | 3.50720  | -0.62160 | -2.78690 |
| H | 1.88420  | -0.64820 | -3.39610 |
| H | 3.05610  | 1.59430  | -3.32460 |
| H | 0.67700  | 1.69780  | -1.81700 |

|   |          |          |          |
|---|----------|----------|----------|
| H | 2.46700  | 1.54210  | -0.32730 |
| H | 4.08760  | 1.41740  | -1.03680 |
| H | 3.70400  | 3.65630  | -2.14570 |
| H | 2.15340  | 3.78410  | -1.32110 |
| H | 4.88460  | 3.55030  | 0.05060  |
| H | 3.99250  | 5.04450  | -0.21280 |
| H | 2.09370  | 4.13220  | 1.18790  |
| H | 3.06620  | 2.69910  | 1.53090  |
| H | 3.25490  | 4.33050  | 3.36470  |
| H | 4.82790  | 4.12790  | 2.57390  |
| H | 3.84660  | 5.56990  | 2.24550  |
| H | -5.72670 | 3.97790  | 1.14980  |
| H | -4.28080 | 4.29310  | 0.17590  |
| H | -5.23650 | 2.82150  | -0.08470 |
| H | -4.57380 | 4.11240  | 3.33560  |
| H | -3.08640 | 3.20560  | 3.63960  |
| H | -3.07260 | 4.57700  | 2.51580  |
| H | -3.32200 | -0.51960 | -2.38920 |
| H | -3.47680 | 1.62040  | -0.84490 |
| H | -4.26760 | 0.01920  | 1.21820  |
| H | -3.11450 | -2.85710 | -2.86750 |
| H | -2.37550 | -3.21780 | -1.31430 |
| H | -1.12310 | -1.98200 | -3.76340 |
| H | -0.40250 | -3.16040 | -2.66590 |
| H | -0.08250 | -0.33710 | -2.67370 |
| H | -2.09290 | 3.03160  | 0.74960  |
| H | -2.12820 | 1.72240  | 1.91660  |
| H | -4.60750 | 1.95790  | 2.13400  |

Standard orientations of **2bi**

|   |          |          |          |
|---|----------|----------|----------|
| C | -0.47910 | -3.23840 | 0.59460  |
| C | 0.27390  | -3.57340 | -0.52510 |
| C | 1.36310  | -2.78780 | -0.90100 |
| C | 1.68310  | -1.65450 | -0.12190 |
| C | 0.92270  | -1.28320 | 1.01750  |
| C | -0.18090 | -2.10240 | 1.37520  |
| C | 2.19510  | -3.10320 | -2.08700 |
| O | 1.81020  | -4.20770 | -2.75720 |
| O | 3.15310  | -2.44590 | -2.45800 |
| O | 2.76130  | -0.86340 | -0.44510 |
| O | -0.13450 | -4.69770 | -1.19090 |
| C | -1.08760 | -1.85290 | 2.57290  |
| C | -2.31350 | -0.93850 | 2.35020  |
| O | -1.93410 | 0.43400  | 2.40800  |
| C | -3.11310 | -1.22500 | 1.07230  |
| C | -4.38750 | -0.37670 | 0.98630  |

|   |          |          |          |
|---|----------|----------|----------|
| C | -5.18030 | -0.69590 | -0.28270 |
| C | -6.44880 | 0.15180  | -0.37350 |
| C | -7.23880 | -0.16140 | -1.63410 |
| O | 4.56510  | 2.50380  | -0.14150 |
| C | -2.00870 | 4.15660  | -2.64170 |
| C | -1.03600 | 5.43420  | -0.72510 |
| C | 3.36470  | 2.35760  | 0.06180  |
| C | 2.75970  | 1.80100  | 1.35460  |
| N | 1.48310  | 1.15970  | 1.06720  |
| C | 0.51860  | 1.76590  | 0.28740  |
| C | 1.02700  | 3.04540  | -0.43380 |
| N | 2.43020  | 2.85330  | -0.82470 |
| C | 3.59680  | 0.72040  | 2.02260  |
| C | 2.56560  | -0.19760 | 2.68090  |
| C | 1.28230  | -0.05140 | 1.84420  |
| O | -0.64900 | 1.38270  | 0.26220  |
| C | 0.17760  | 3.39450  | -1.66410 |
| C | -1.18630 | 4.04750  | -1.35410 |
| H | -1.32040 | -3.87850 | 0.85840  |
| H | 2.45650  | -4.26550 | -3.49740 |
| H | 3.19710  | -1.19080 | -1.26150 |
| H | 0.46360  | -4.82860 | -1.95650 |
| H | -1.45930 | -2.82890 | 2.91610  |
| H | -0.48690 | -1.48200 | 3.41180  |
| H | -2.97570 | -1.08890 | 3.21170  |
| H | -1.57970 | 0.68580  | 1.52500  |
| H | -2.50100 | -1.00420 | 0.18960  |
| H | -3.38240 | -2.28720 | 1.03820  |
| H | -5.01310 | -0.56440 | 1.86730  |
| H | -4.12850 | 0.68870  | 0.99330  |
| H | -4.55270 | -0.51310 | -1.16350 |
| H | -5.44750 | -1.75970 | -0.29150 |
| H | -7.08210 | -0.03050 | 0.50250  |
| H | -6.18670 | 1.21620  | -0.36870 |
| H | -8.14160 | 0.45580  | -1.67880 |
| H | -6.64390 | 0.04150  | -2.53040 |
| H | -7.54440 | -1.21230 | -1.65480 |
| H | -2.99300 | 4.59210  | -2.43950 |
| H | -1.50530 | 4.78590  | -3.38350 |
| H | -2.16810 | 3.16840  | -3.08610 |
| H | -2.01540 | 5.90540  | -0.58760 |
| H | -0.56490 | 5.37900  | 0.26030  |
| H | -0.43120 | 6.09370  | -1.35660 |
| H | 2.56760  | 2.63570  | 2.03950  |
| H | 1.02620  | 3.85810  | 0.29970  |
| H | 2.81290  | 3.30220  | -1.65930 |

|   |          |          |          |
|---|----------|----------|----------|
| H | 4.29510  | 1.14000  | 2.75420  |
| H | 4.19790  | 0.16160  | 1.29780  |
| H | 2.37320  | 0.16700  | 3.69830  |
| H | 2.92380  | -1.22830 | 2.76960  |
| H | 0.47190  | 0.18720  | 2.53280  |
| H | 0.01570  | 2.48070  | -2.25180 |
| H | 0.74290  | 4.07480  | -2.31590 |
| H | -1.75000 | 3.41790  | -0.65740 |
